# Supplementary material
Source: MDPI journal article supplement (https://www.mdpi.com/2311-7524/8/5/453)

**Figure S3 – Circular genome maps of all studied specimens**

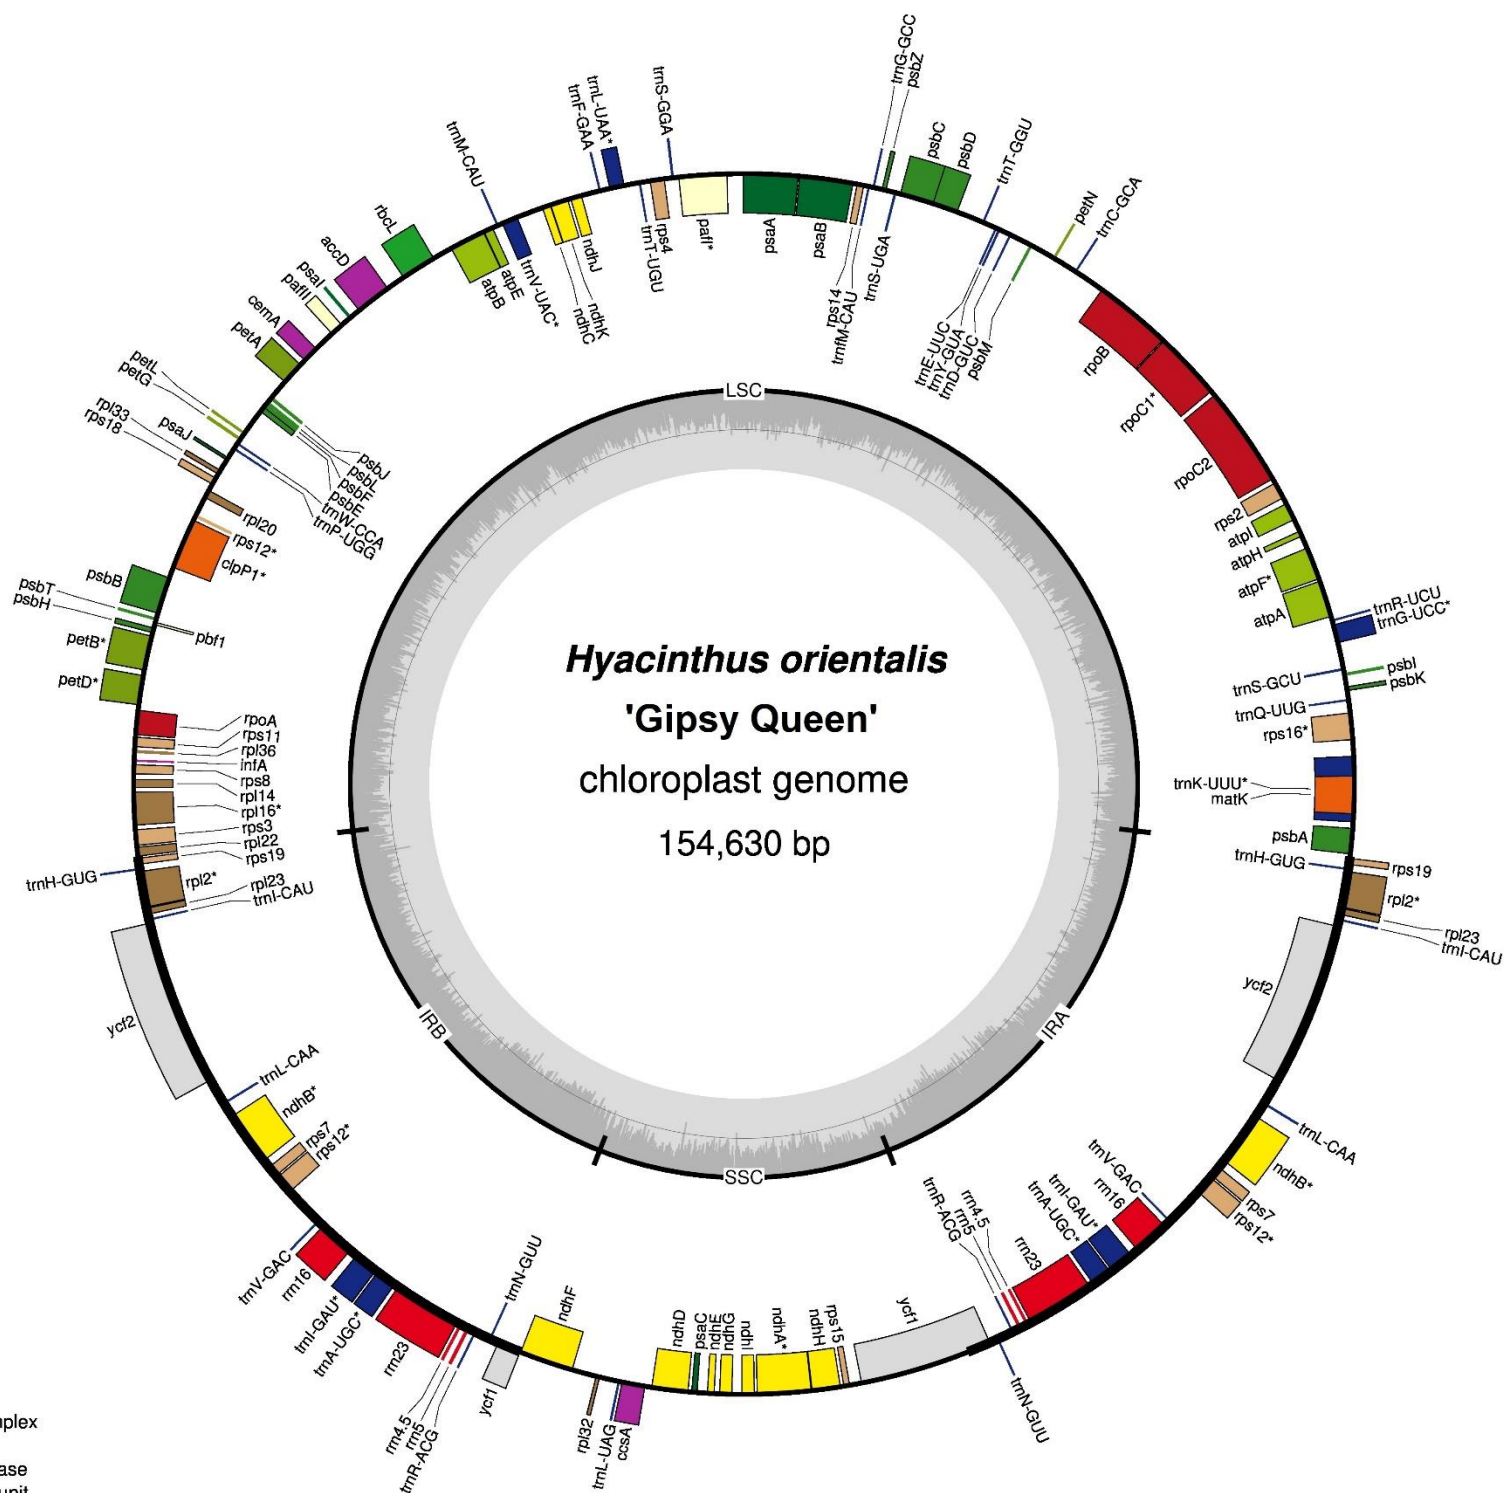

***Hyacinthus orientalis***

## 'Gipsy Queen'

chloroplast genome

154,630 bp

- photosystem I
- photosystem II
- cytochrome b/f complex
- ATP synthase
- NADH dehydrogenase
- RubisCO large subunit
- photosystem assembly/stability factors
- RNA polymerase
- ribosomal proteins (SSU)
- ribosomal proteins (LSU)
- transfer RNAs
- ribosomal RNAs
- clpP, matK
- other genes
- hypothetical chloroplast reading frames (ycf)

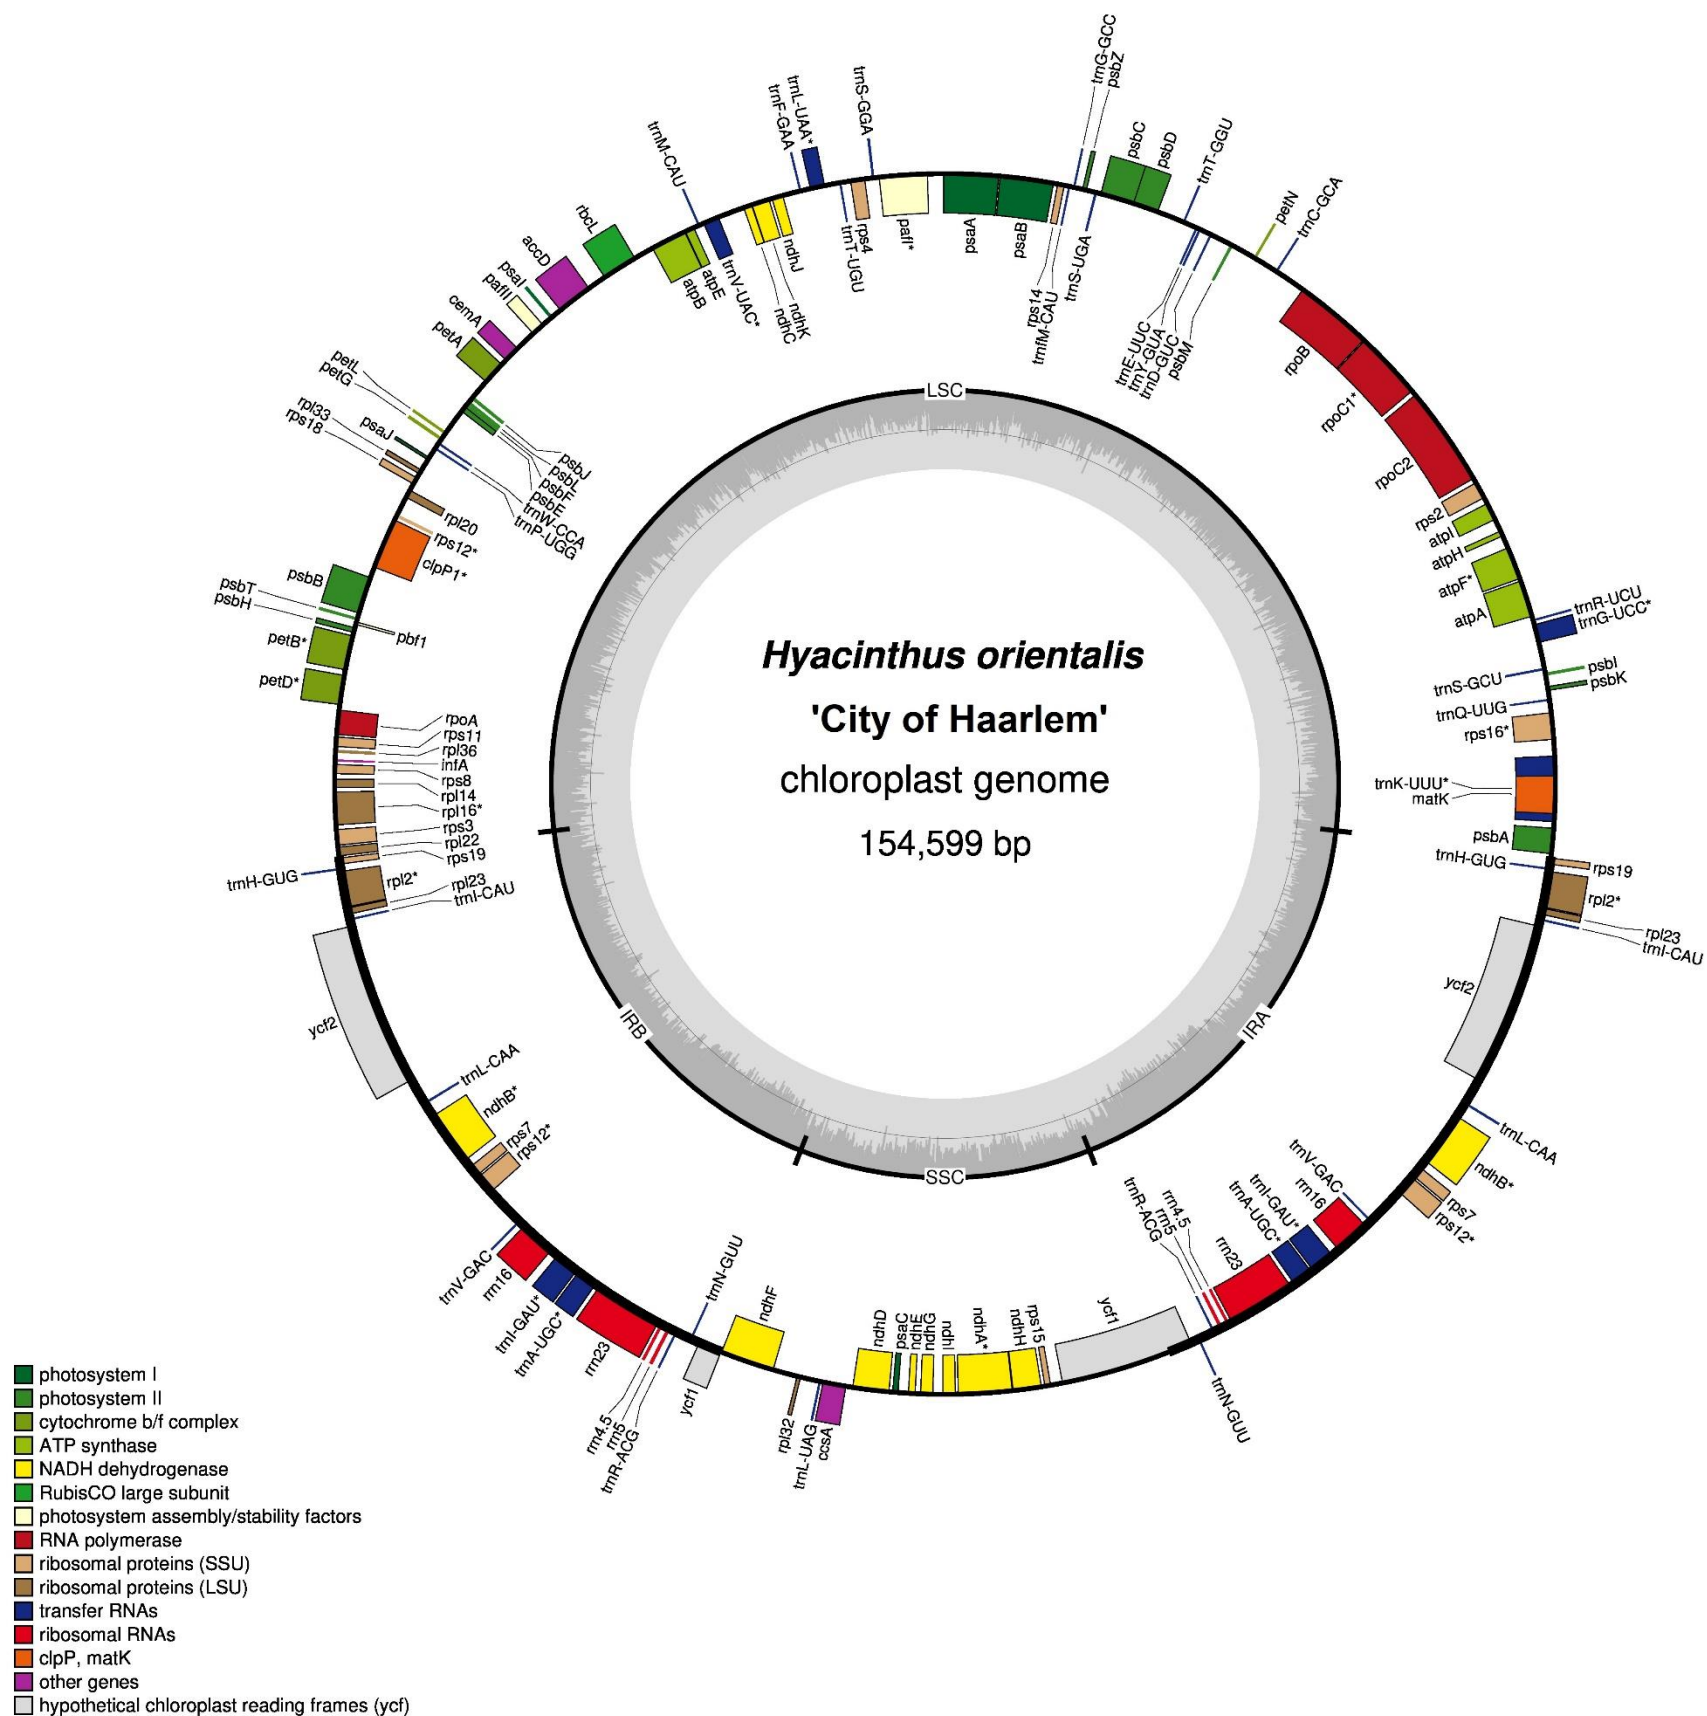

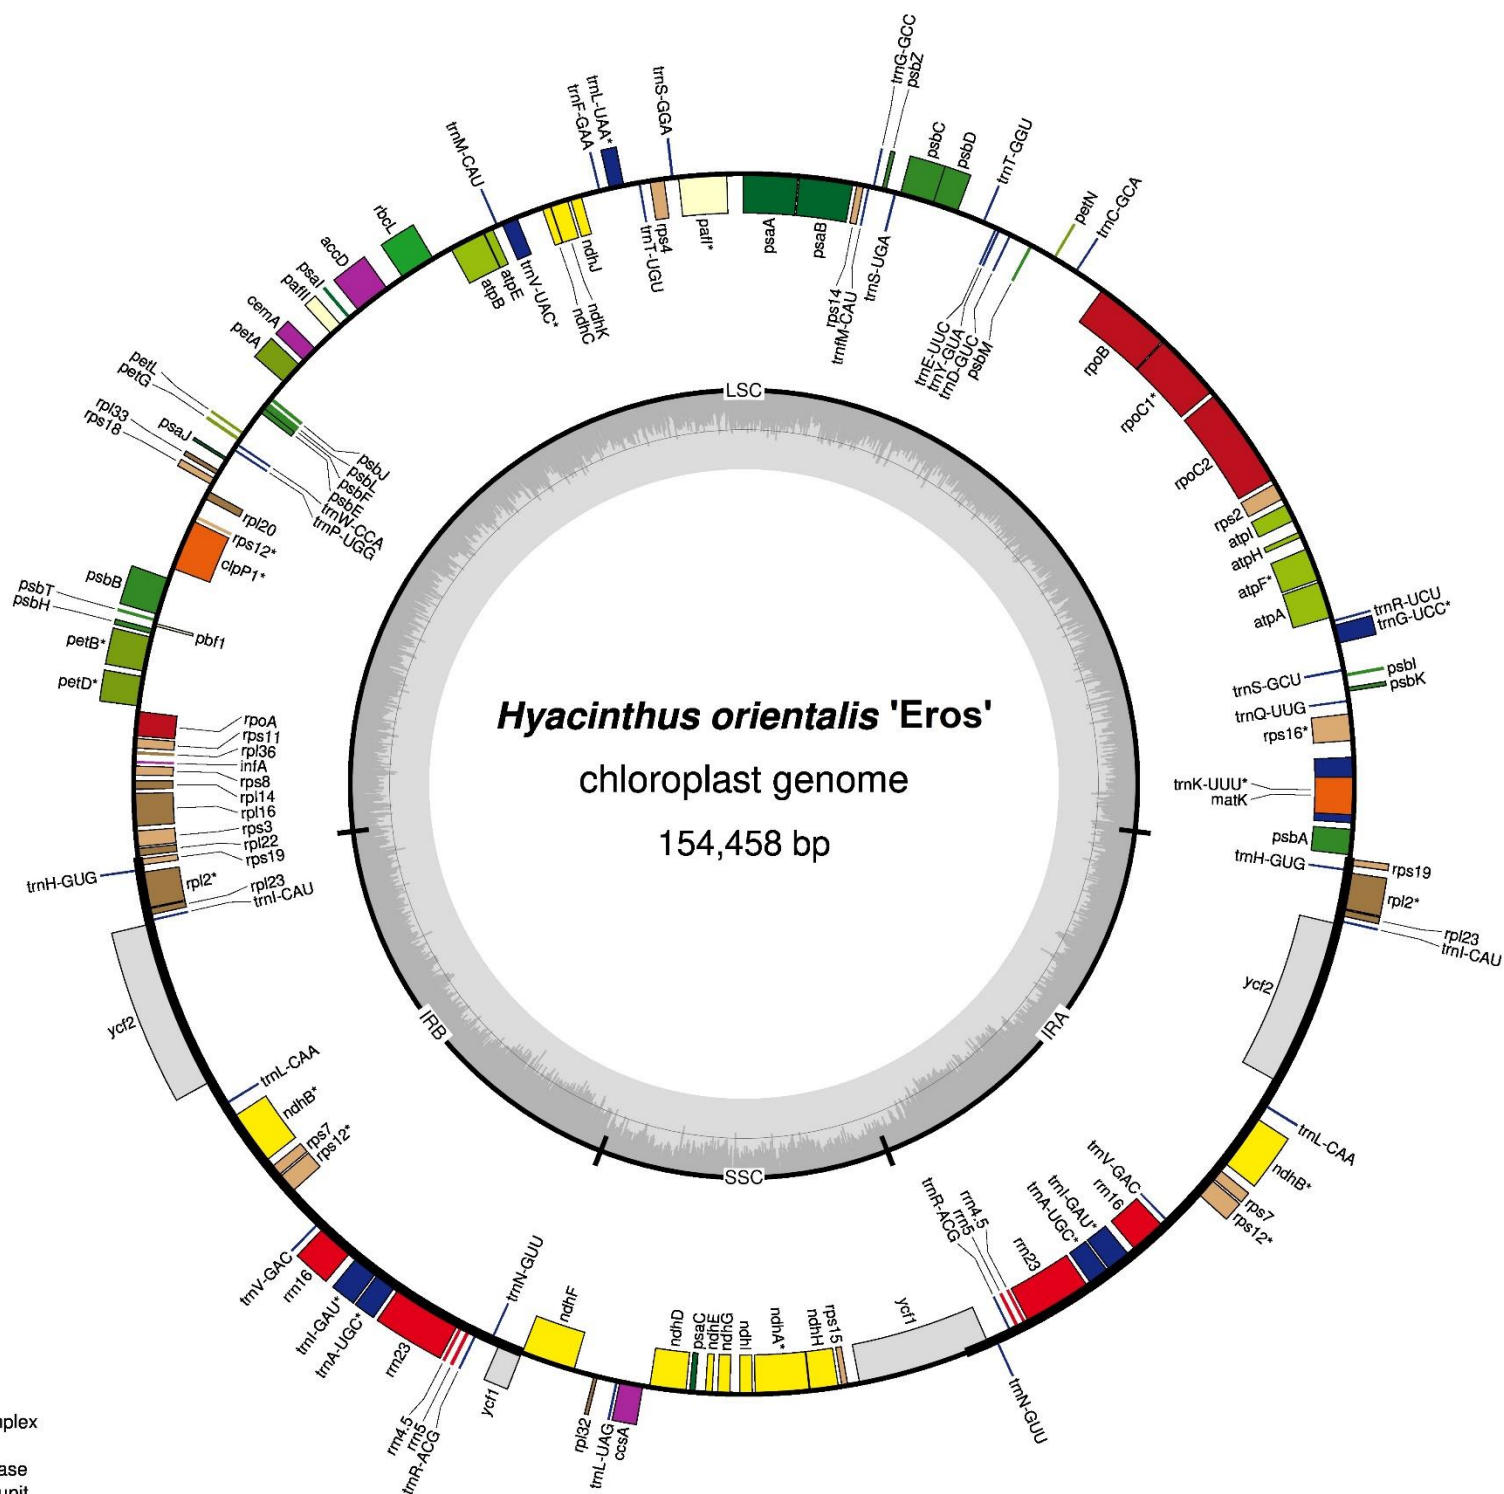

***Hyacinthus orientalis* 'Eros'**

chloroplast genome

154,458 bp

- photosystem I
- photosystem II
- cytochrome b/f complex
- ATP synthase
- NADH dehydrogenase
- RubisCO large subunit
- photosystem assembly/stability factors
- RNA polymerase
- ribosomal proteins (SSU)
- ribosomal proteins (LSU)
- transfer RNAs
- ribosomal RNAs
- clpP, matK
- other genes
- hypothetical chloroplast reading frames (ycf)



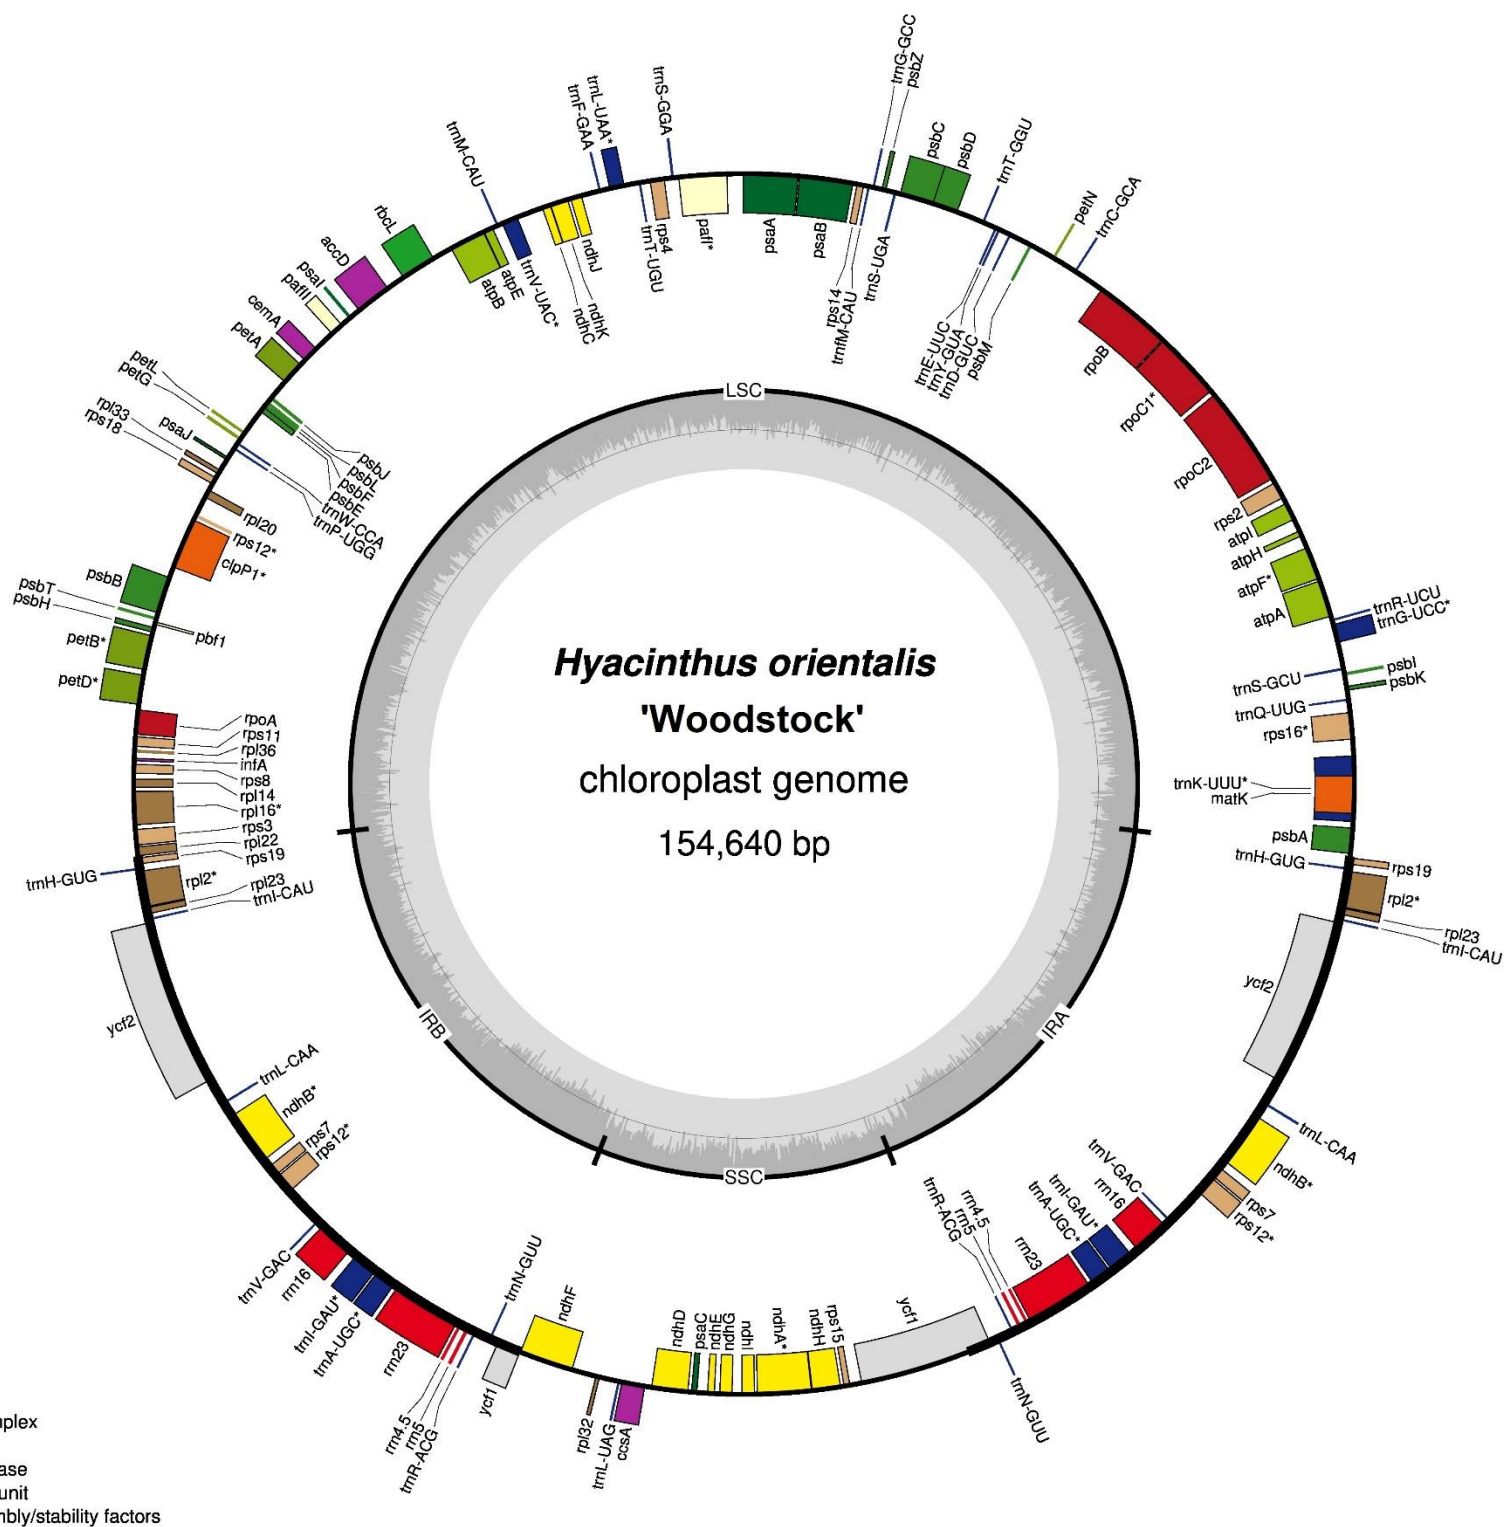

***Hyacinthus orientalis***  
**'Woodstock'**  
chloroplast genome  
154,640 bp

- photosystem I
- photosystem II
- cytochrome b/f complex
- ATP synthase
- NADH dehydrogenase
- RubisCO large subunit
- photosystem assembly/stability factors
- RNA polymerase
- ribosomal proteins (SSU)
- ribosomal proteins (LSU)
- transfer RNAs
- ribosomal RNAs
- clpP, matK
- other genes
- hypothetical chloroplast reading frames (ycf)

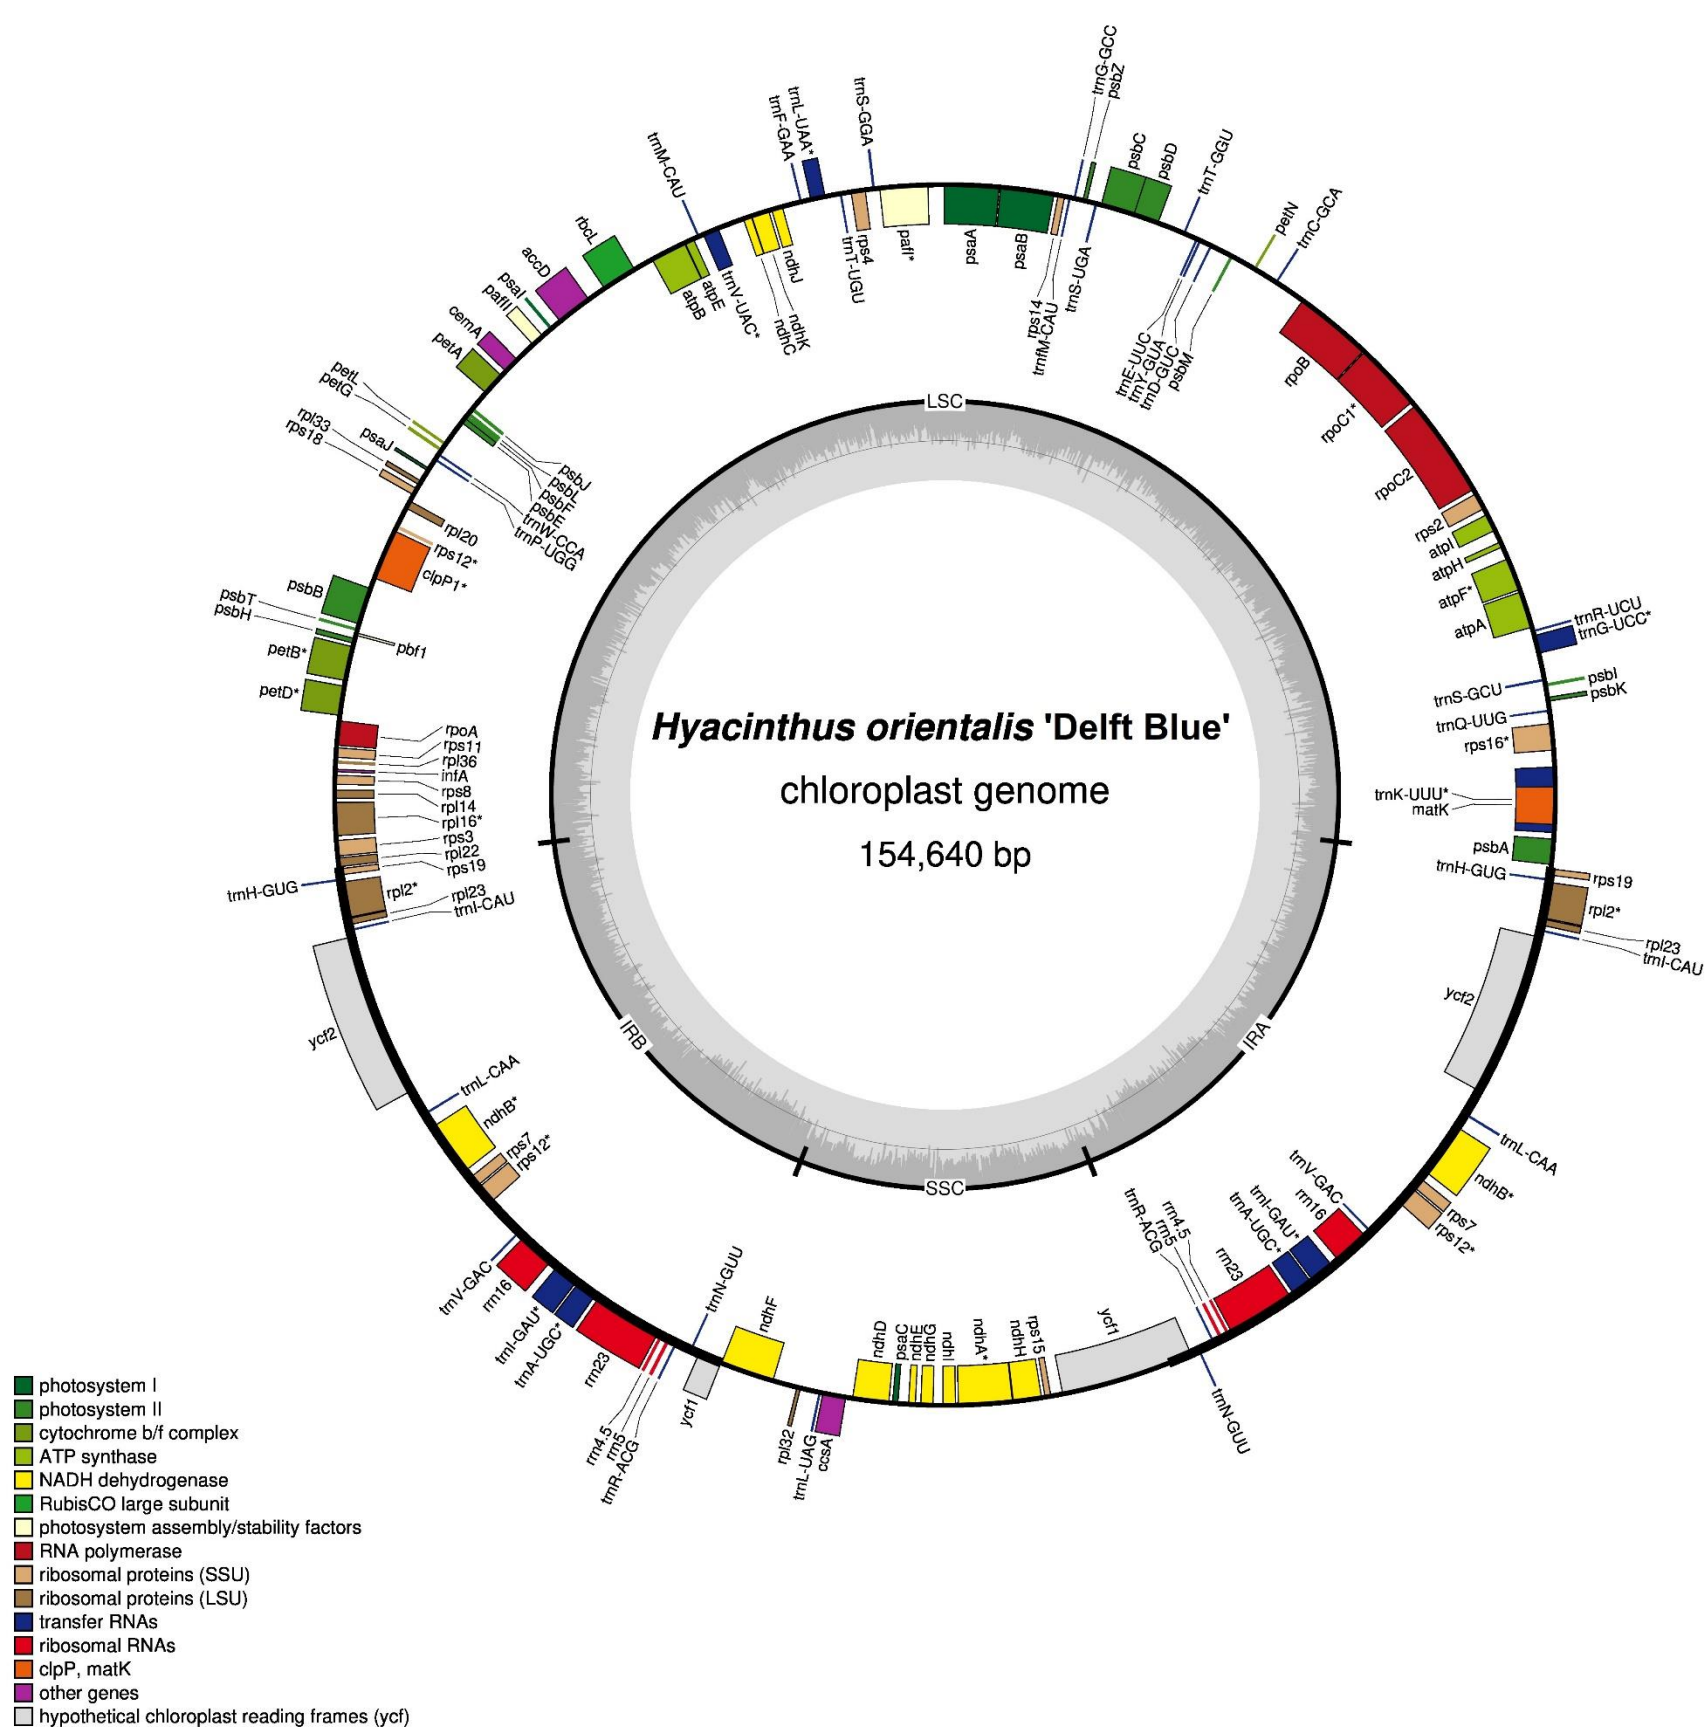

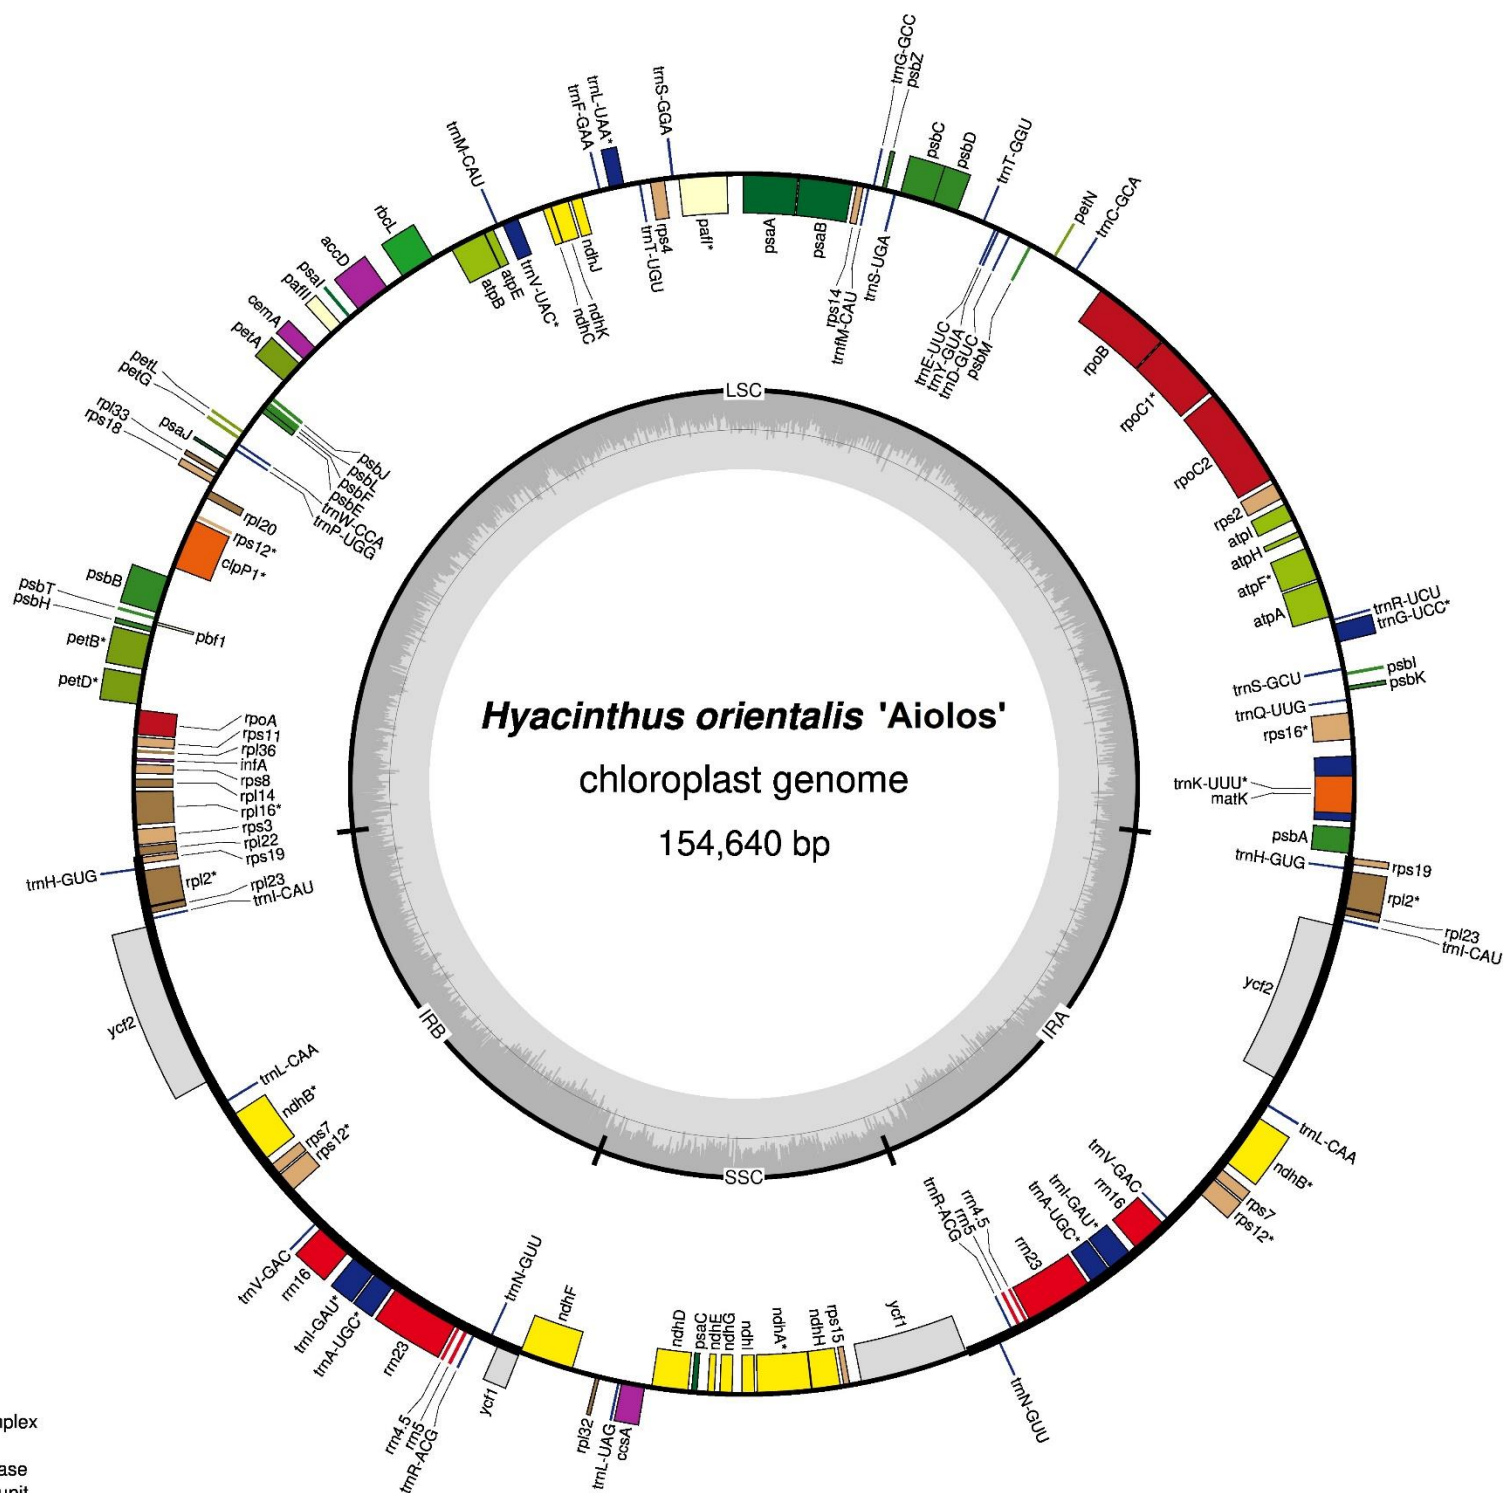

***Hyacinthus orientalis* 'Aiolos'**

chloroplast genome

154,640 bp

- photosystem I
- photosystem II
- cytochrome b/f complex
- ATP synthase
- NADH dehydrogenase
- RubisCO large subunit
- photosystem assembly/stability factors
- RNA polymerase
- ribosomal proteins (SSU)
- ribosomal proteins (LSU)
- transfer RNAs
- ribosomal RNAs
- clpP, matK
- other genes
- hypothetical chloroplast reading frames (ycf)

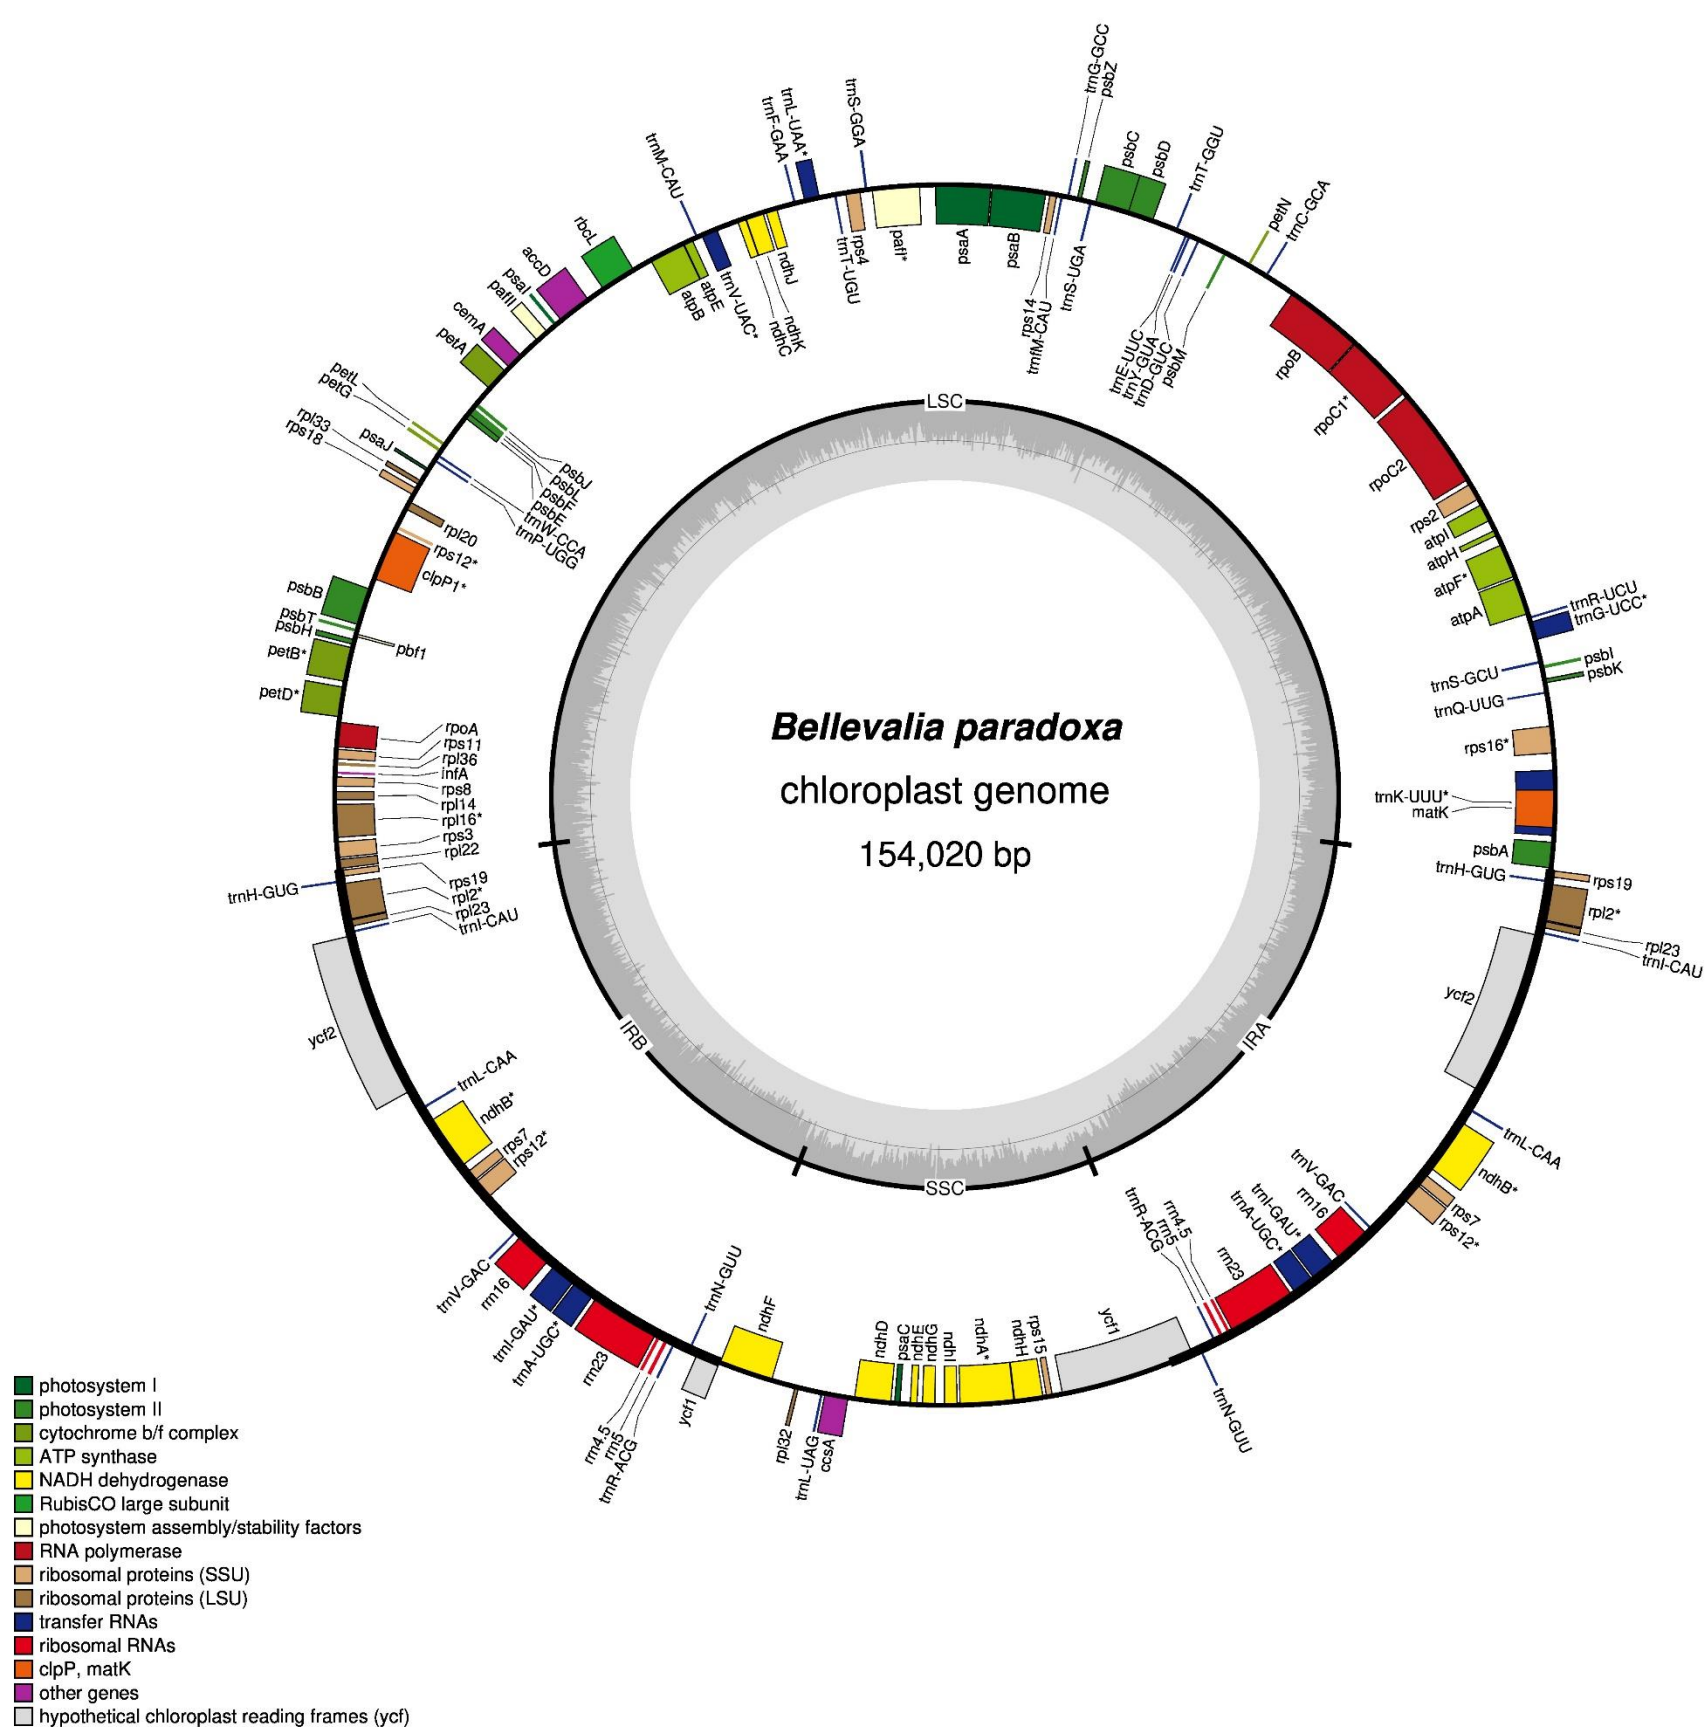

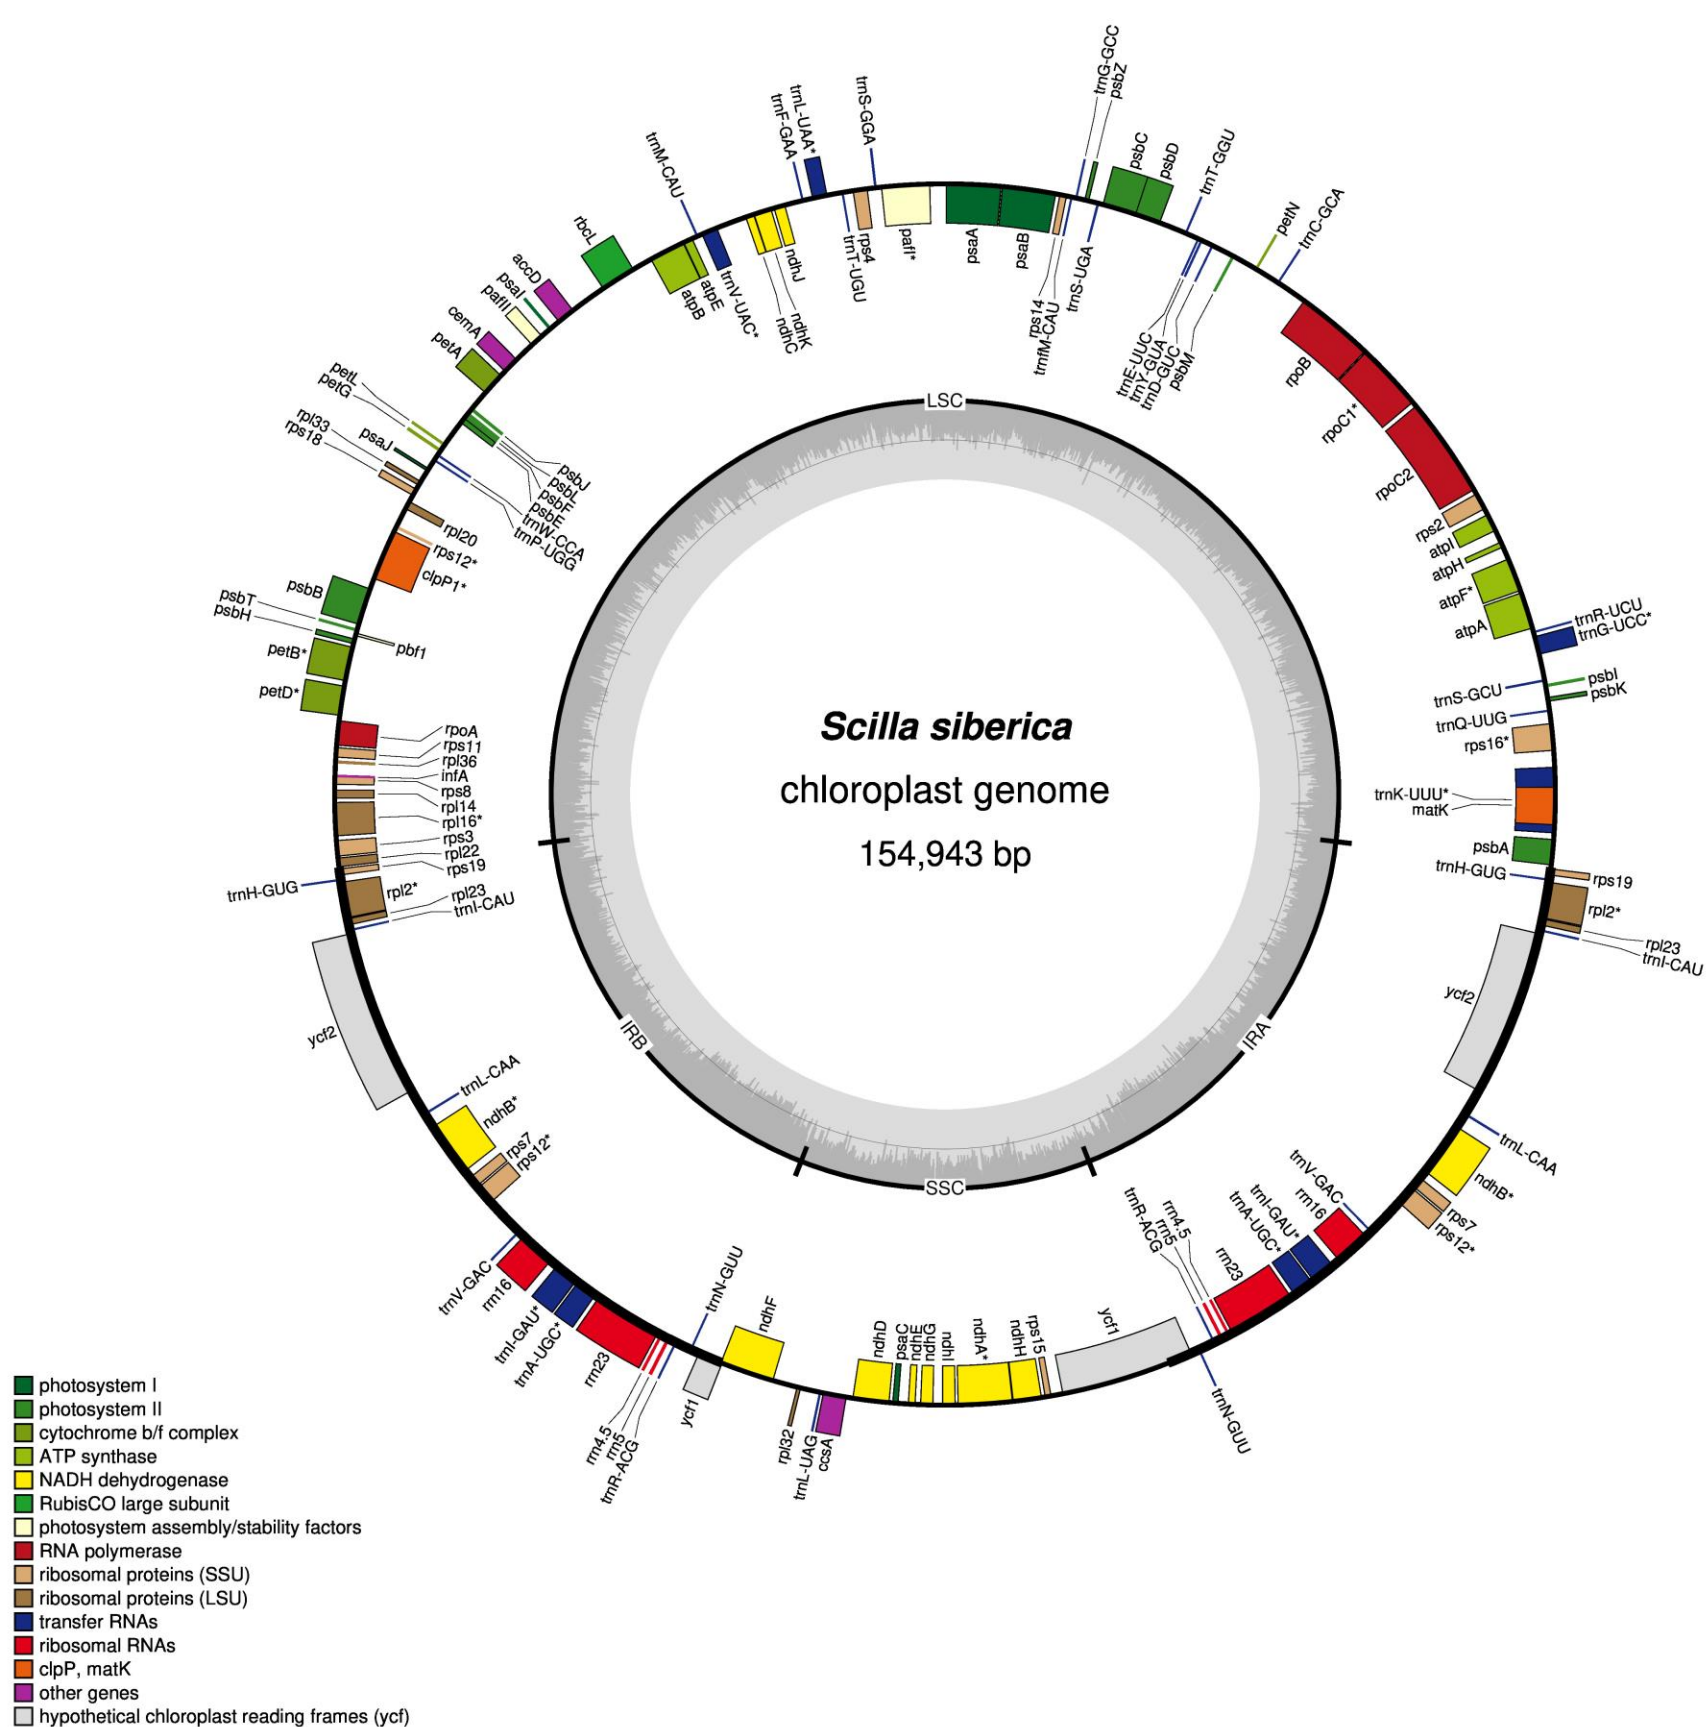

Supplement: s1 [file s1 › Figure_S3.pdf]
