# Supplementary material
Source: MDPI journal article supplement (https://www.mdpi.com/2311-7524/8/5/453)

**Figure S5 - Alignment visualisation of fifteen Scilloideae chloroplast genomes using *Hyacinthus orientalis* L. ‘Gipsy Queen’ as reference**

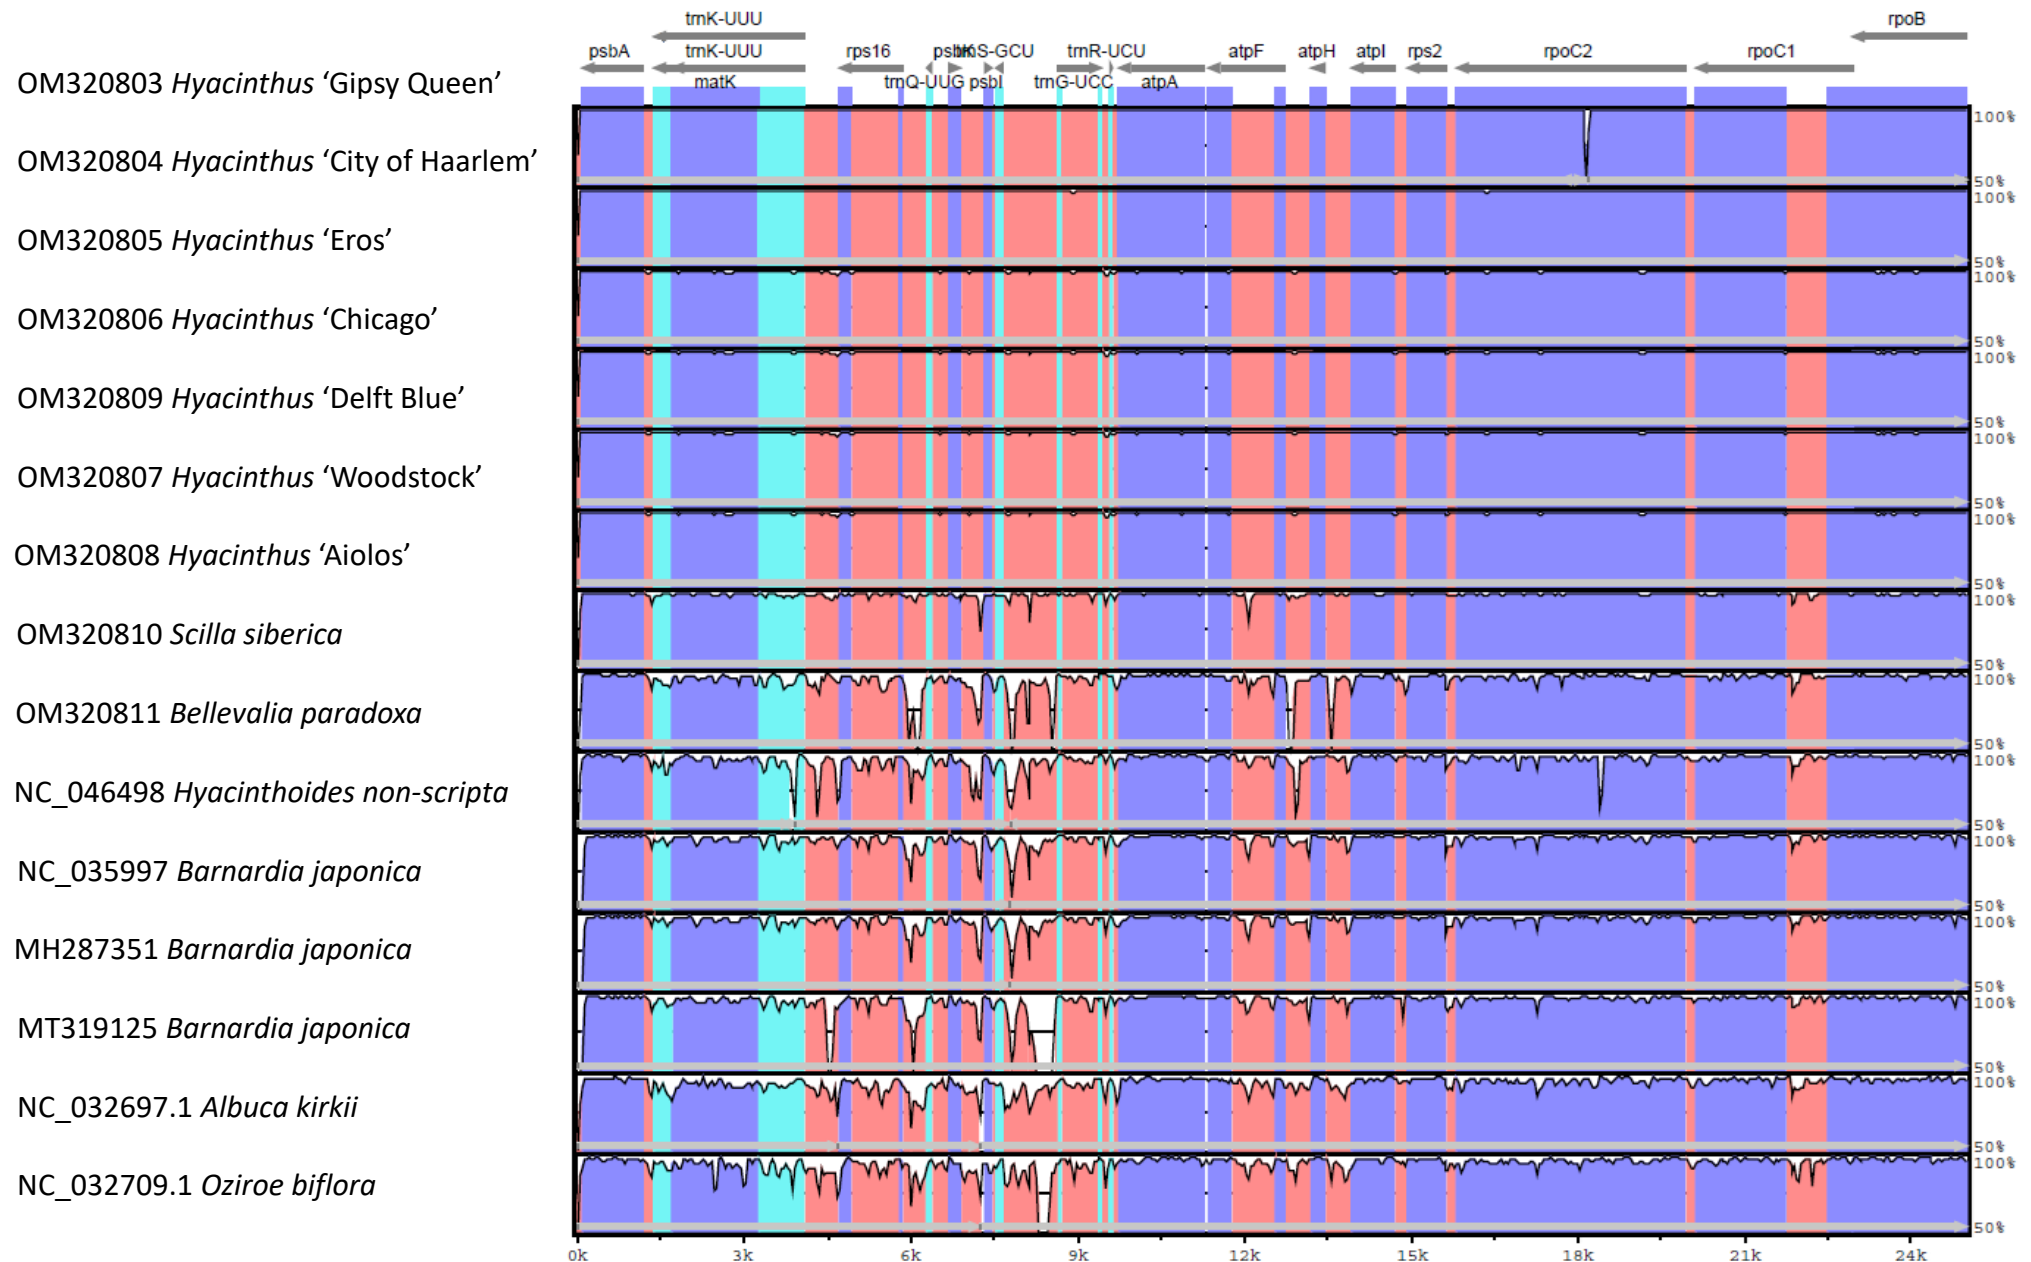

**Figure S5 - Alignment visualisation of fifteen Scilloideae chloroplast genomes using *Hyacinthus orientalis* L. ‘Gipsy Queen’ as reference**

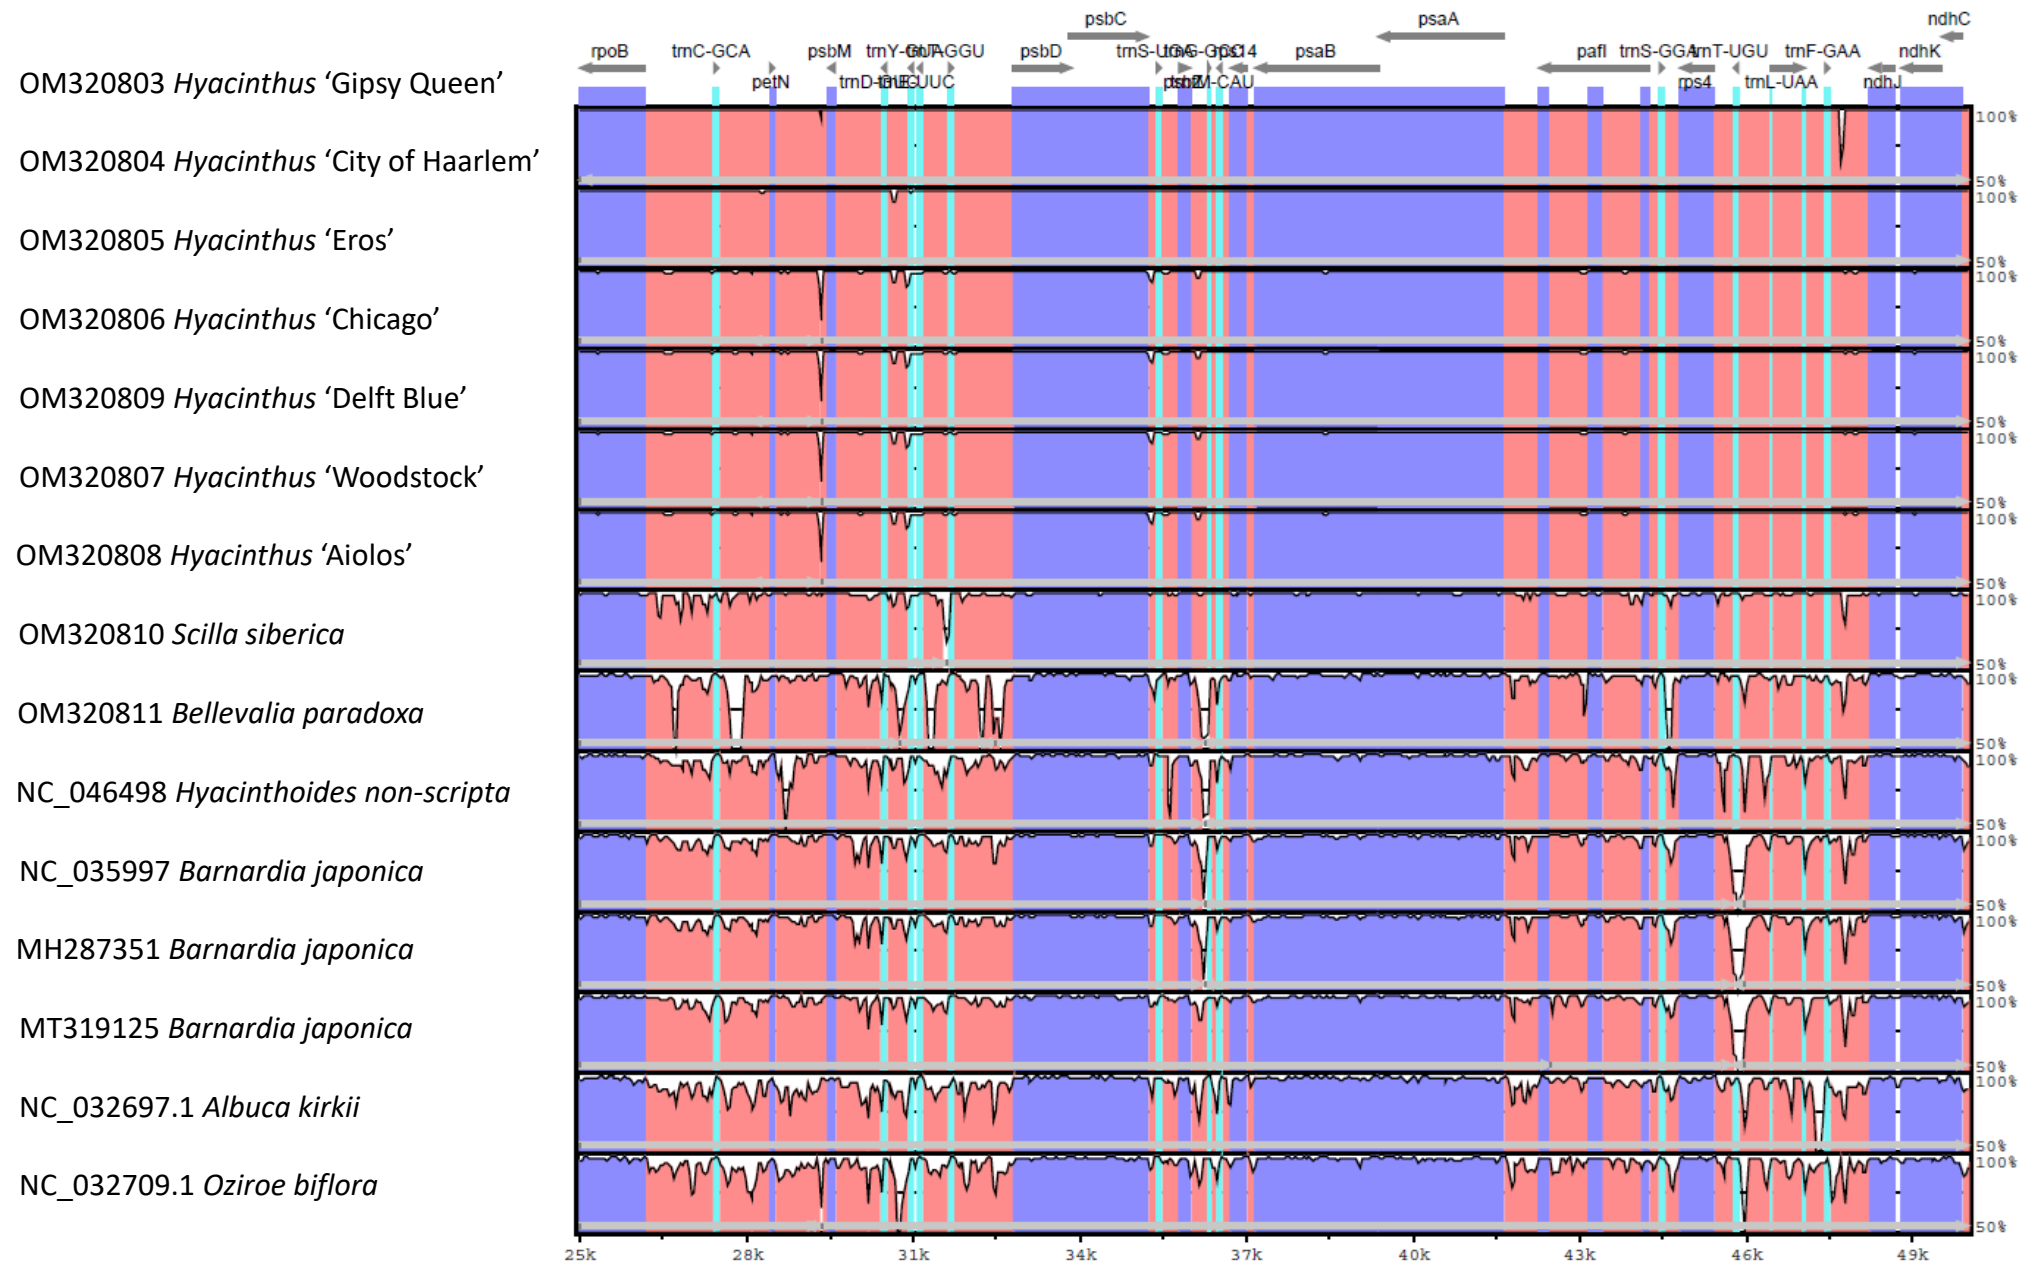



**Figure S5 - Alignment visualisation of fifteen Scilloideae chloroplast genomes using *Hyacinthus orientalis* L. ‘Gipsy Queen’ as reference**

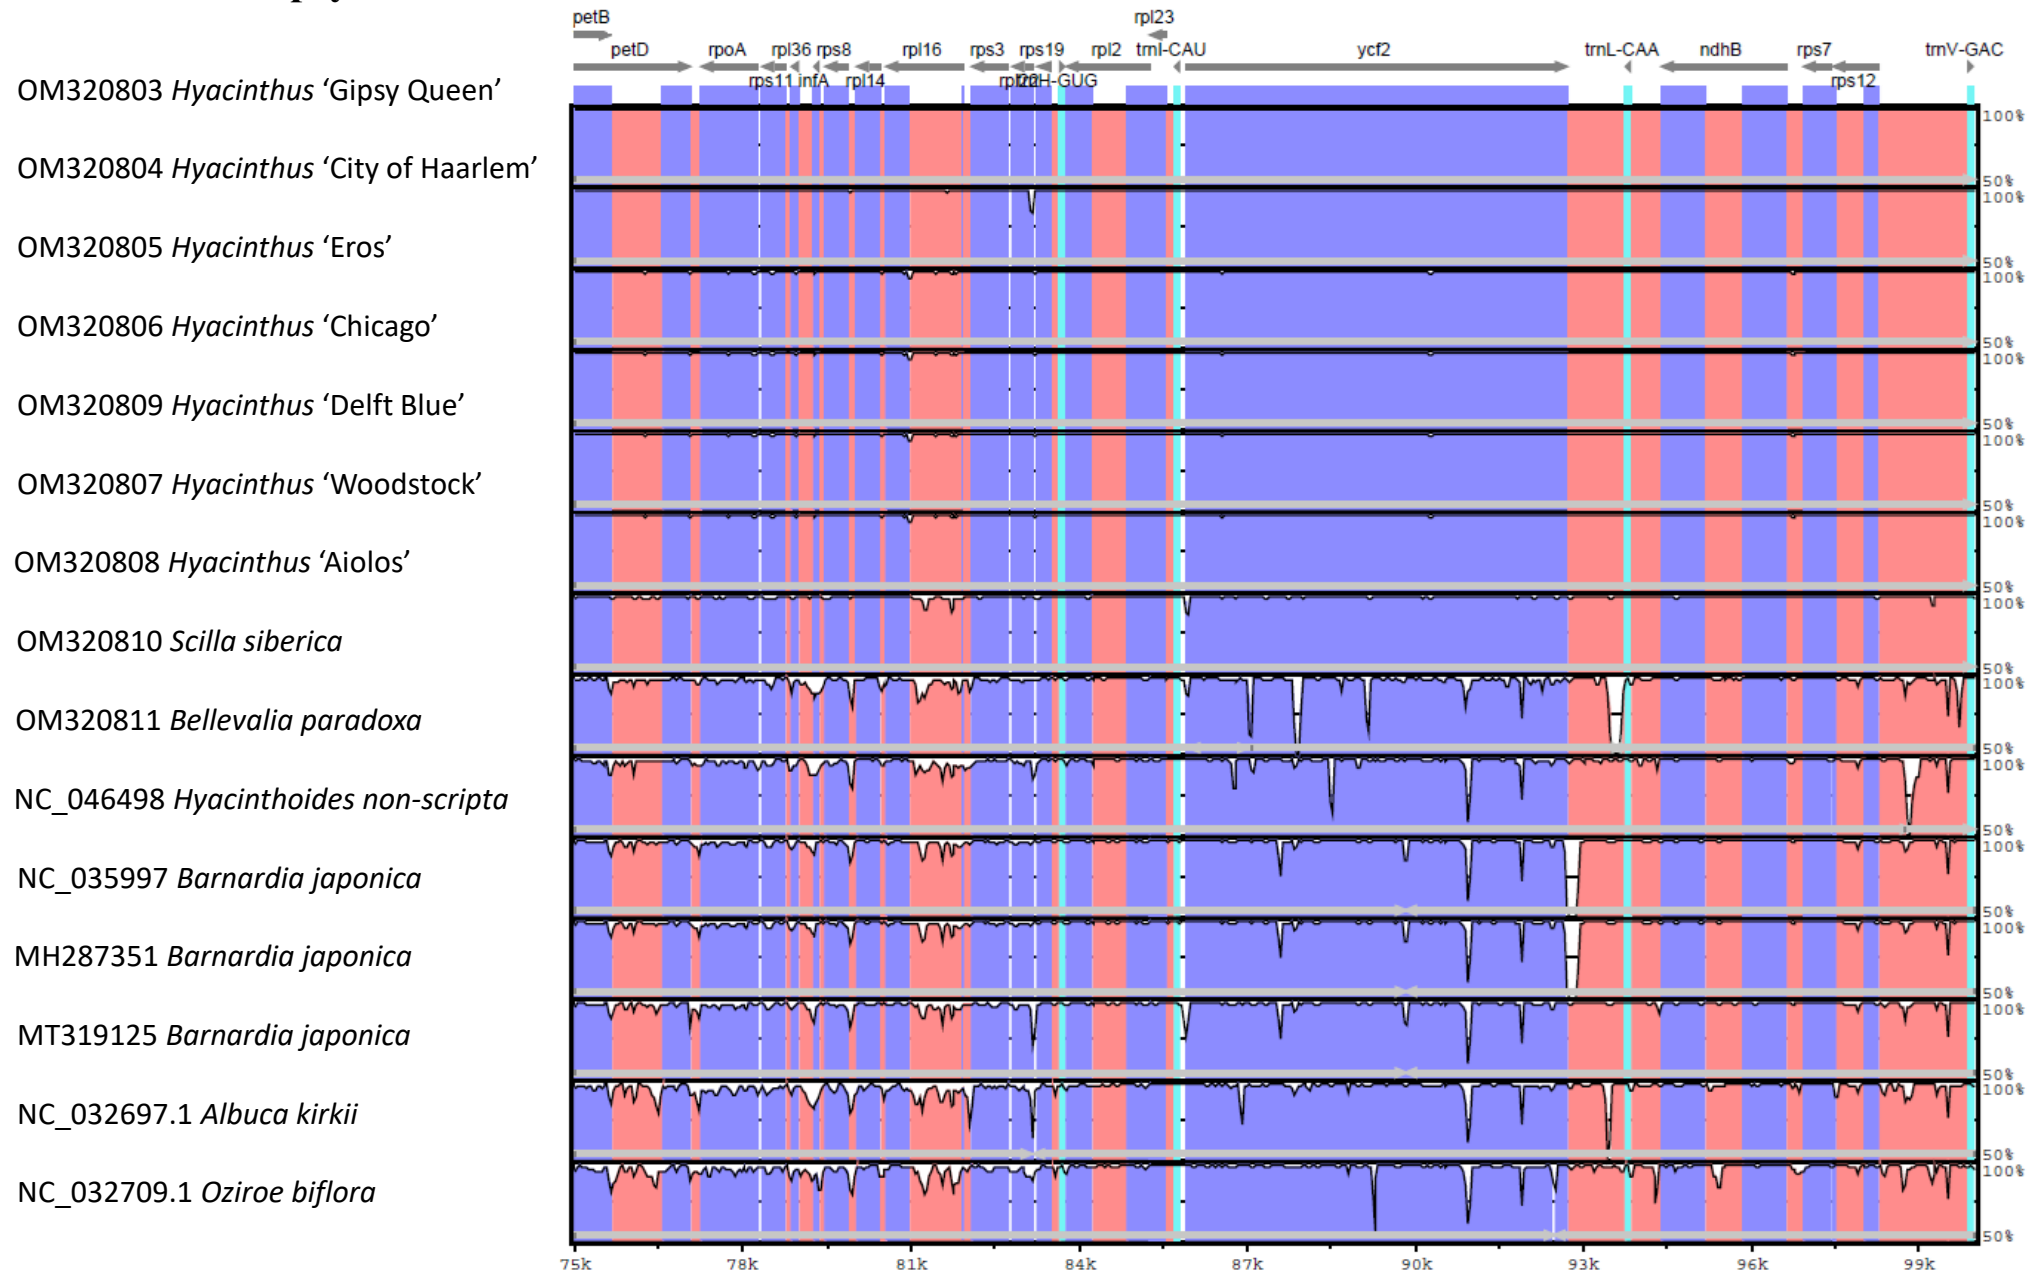

**Figure S5 - Alignment visualisation of fifteen Scilloideae chloroplast genomes using *Hyacinthus orientalis* L. ‘Gipsy Queen’ as reference**

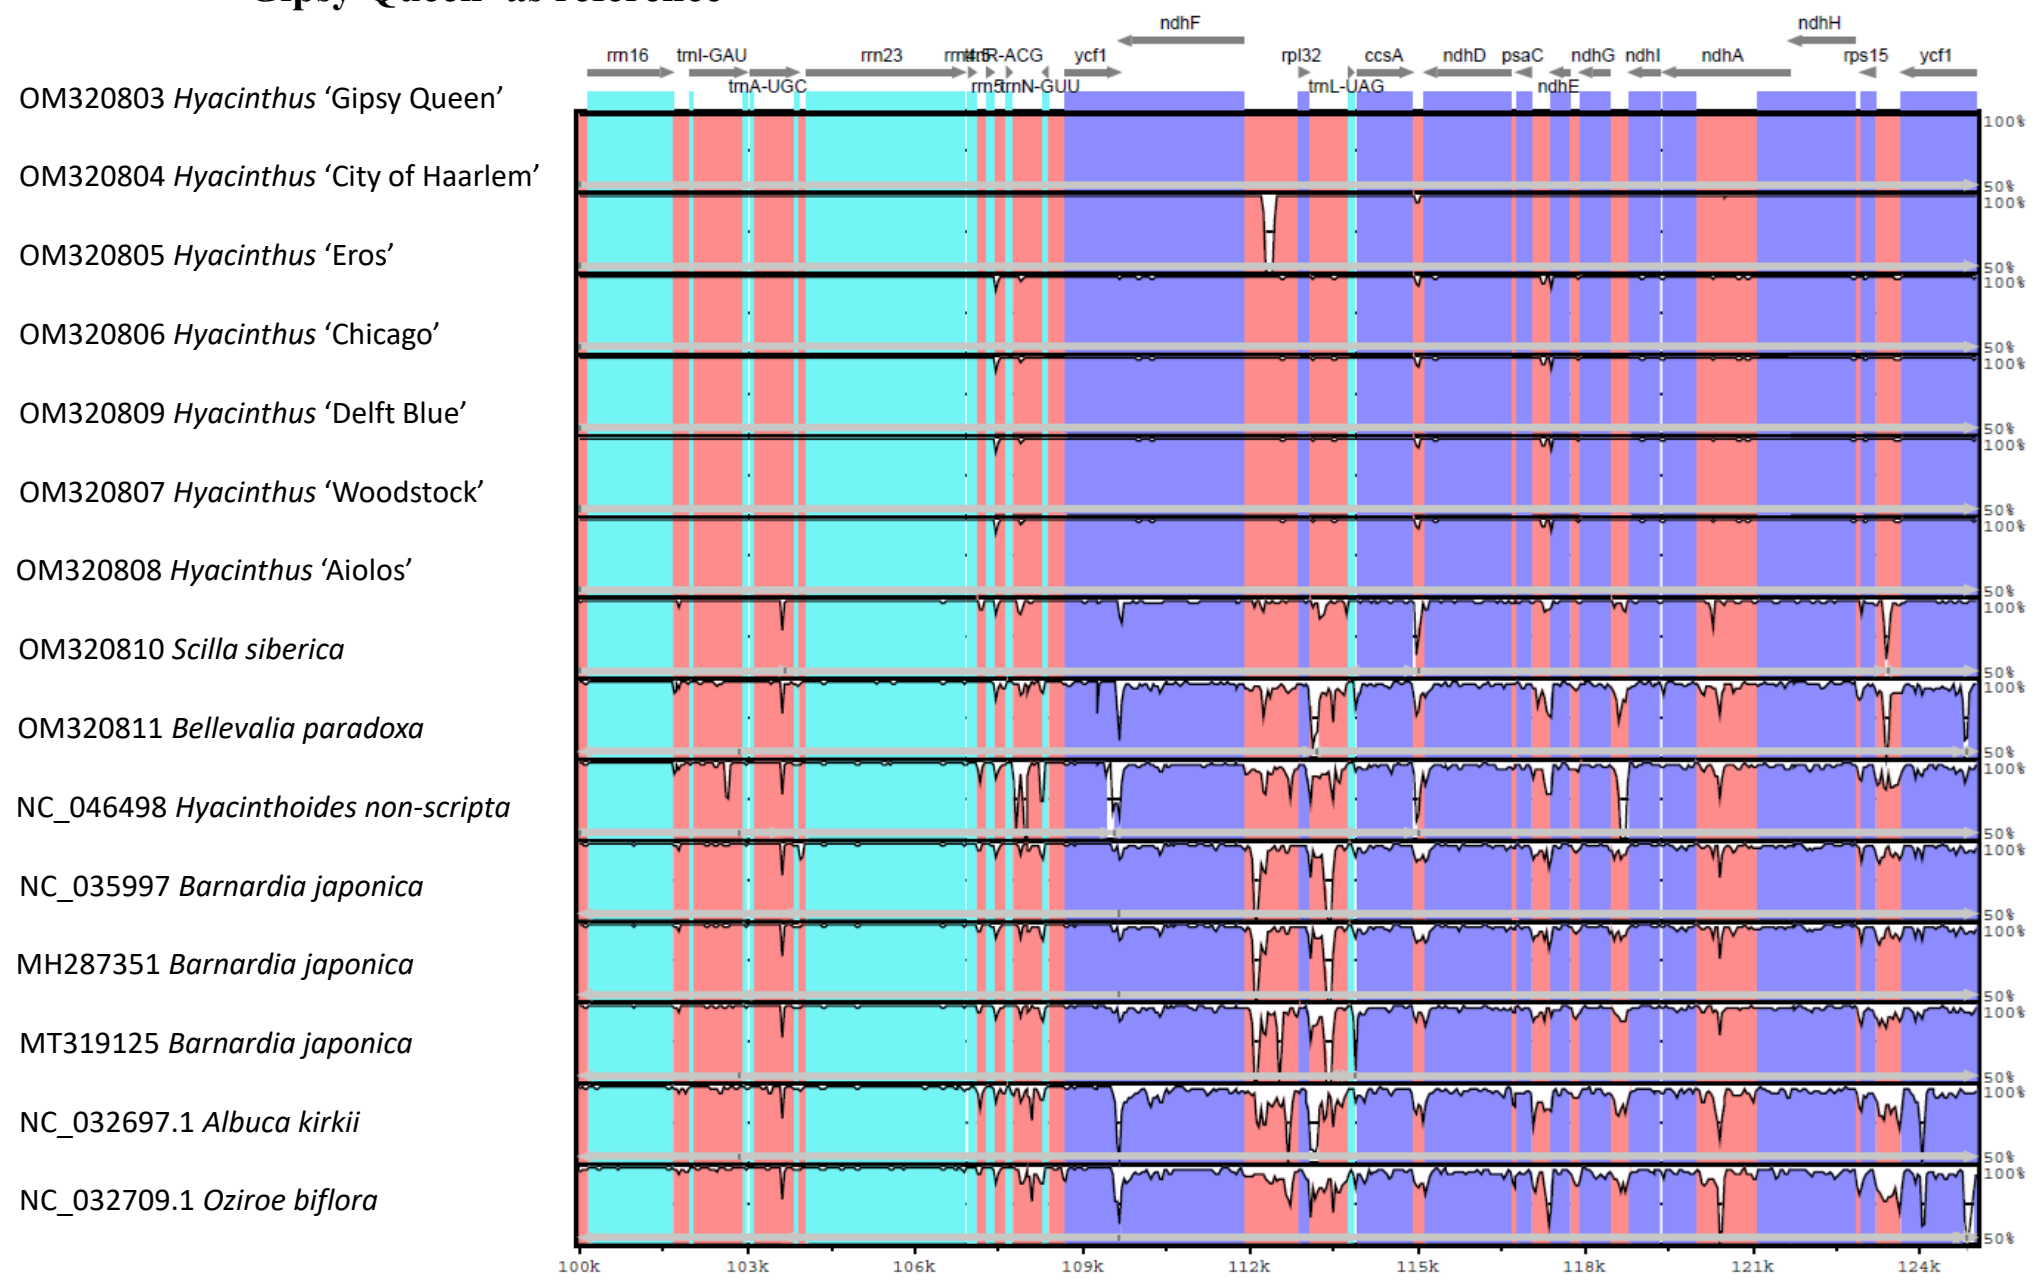



**Figure S5 - Alignment visualisation of fifteen Scilloideae chloroplast genomes using *Hyacinthus orientalis* L. ‘Gipsy Queen’ as reference**

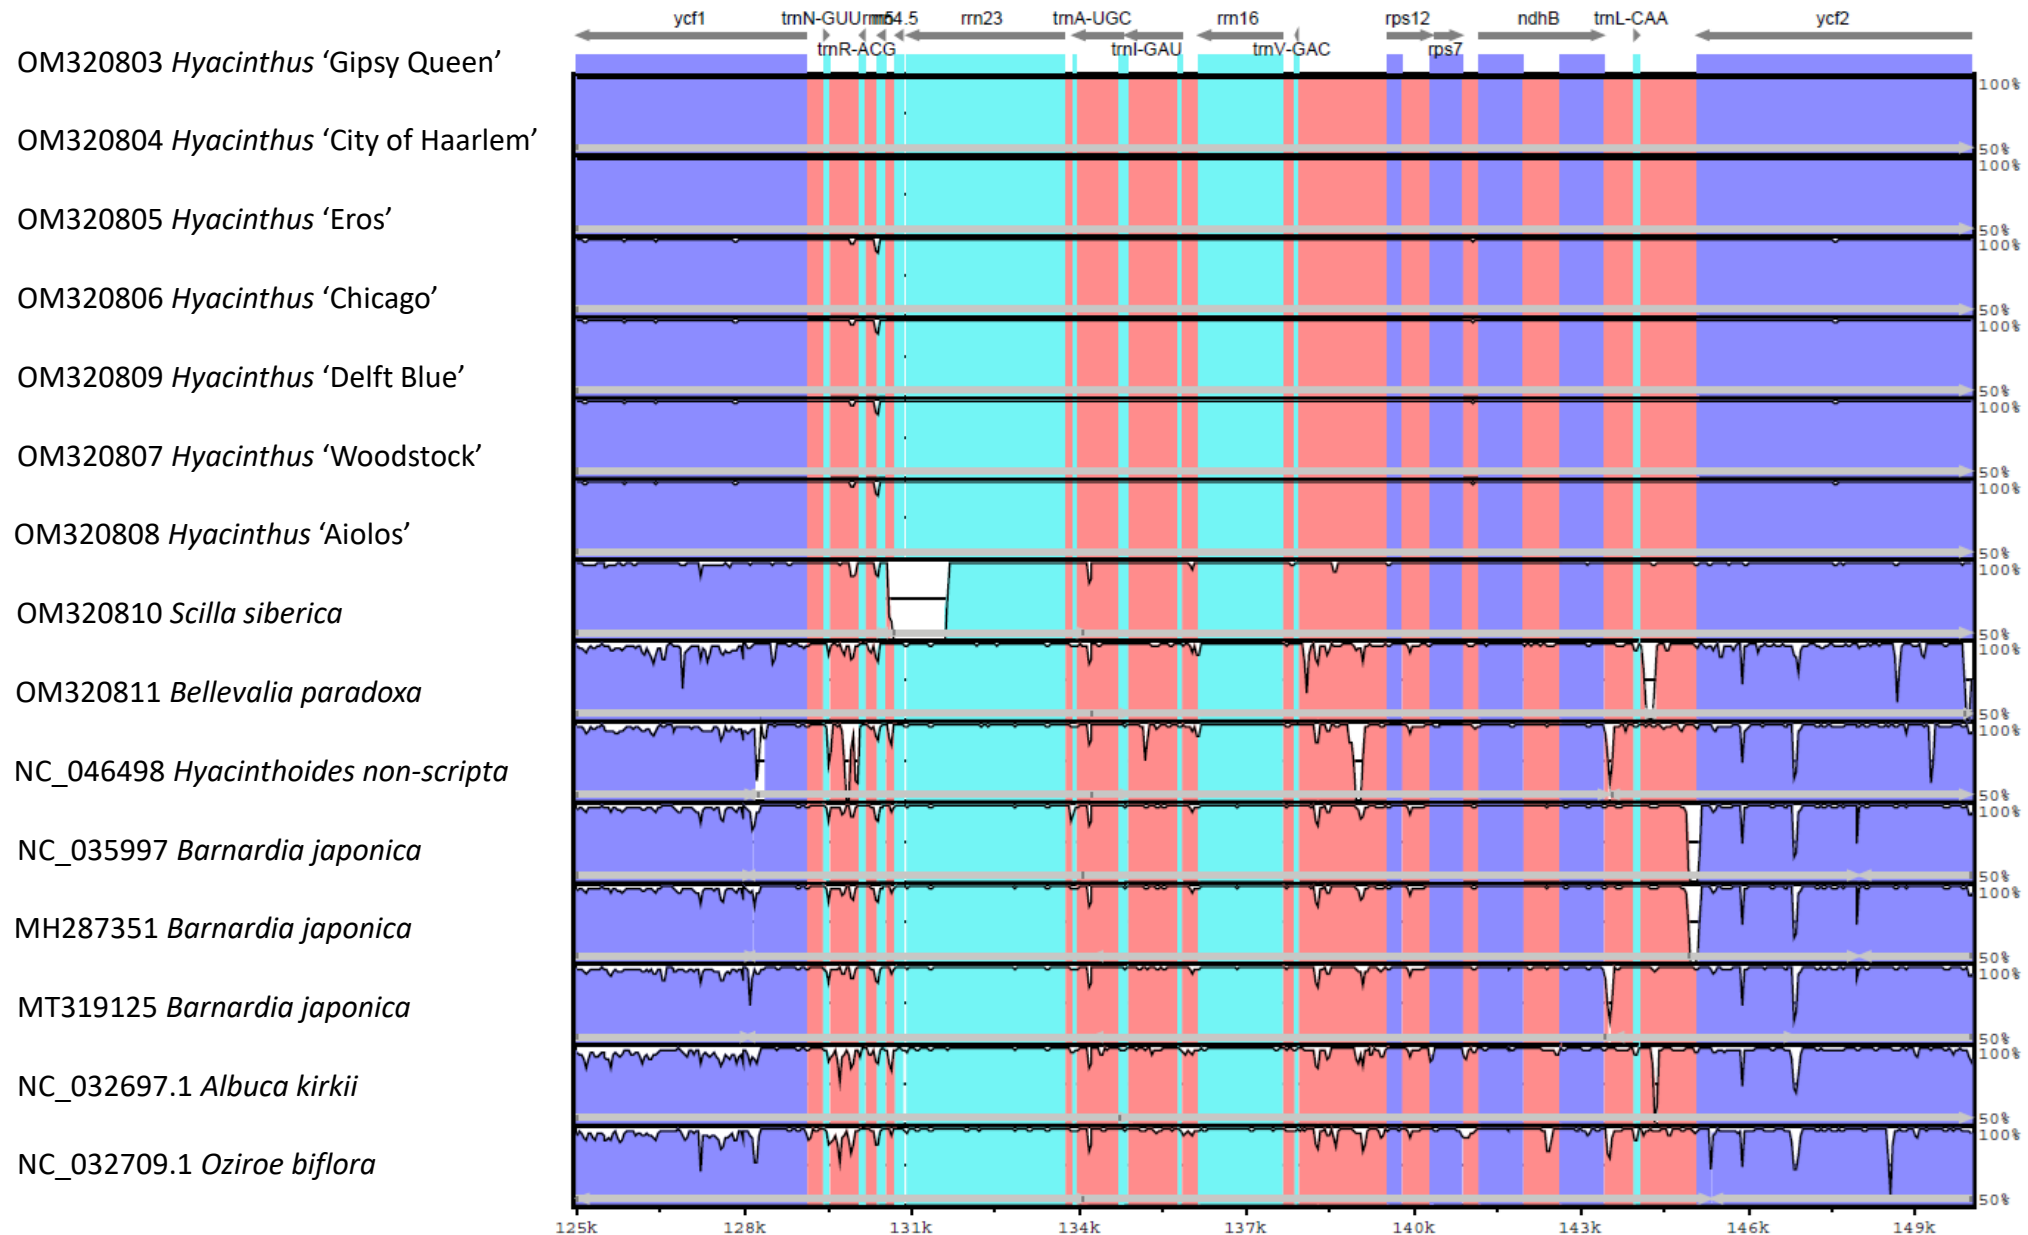

**Figure S5 - Alignment visualisation of fifteen Scilloideae chloroplast genomes using *Hyacinthus orientalis* L. ‘Gipsy Queen’ as reference**

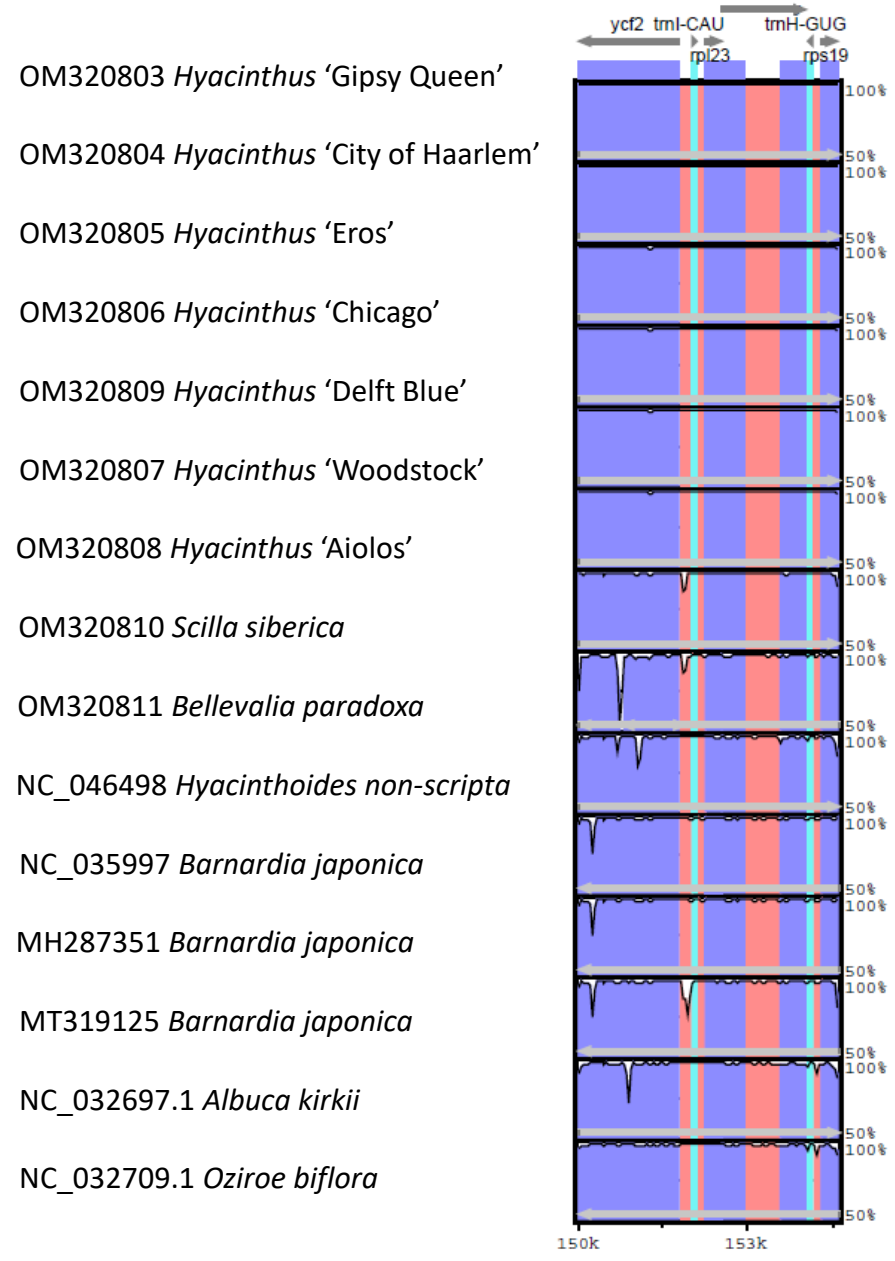

Supplement: s1 [file s1]
