# Supplementary material
Source: MDPI journal article supplement (https://www.mdpi.com/2311-7524/8/5/453)
Supplement: s1 [file s1]

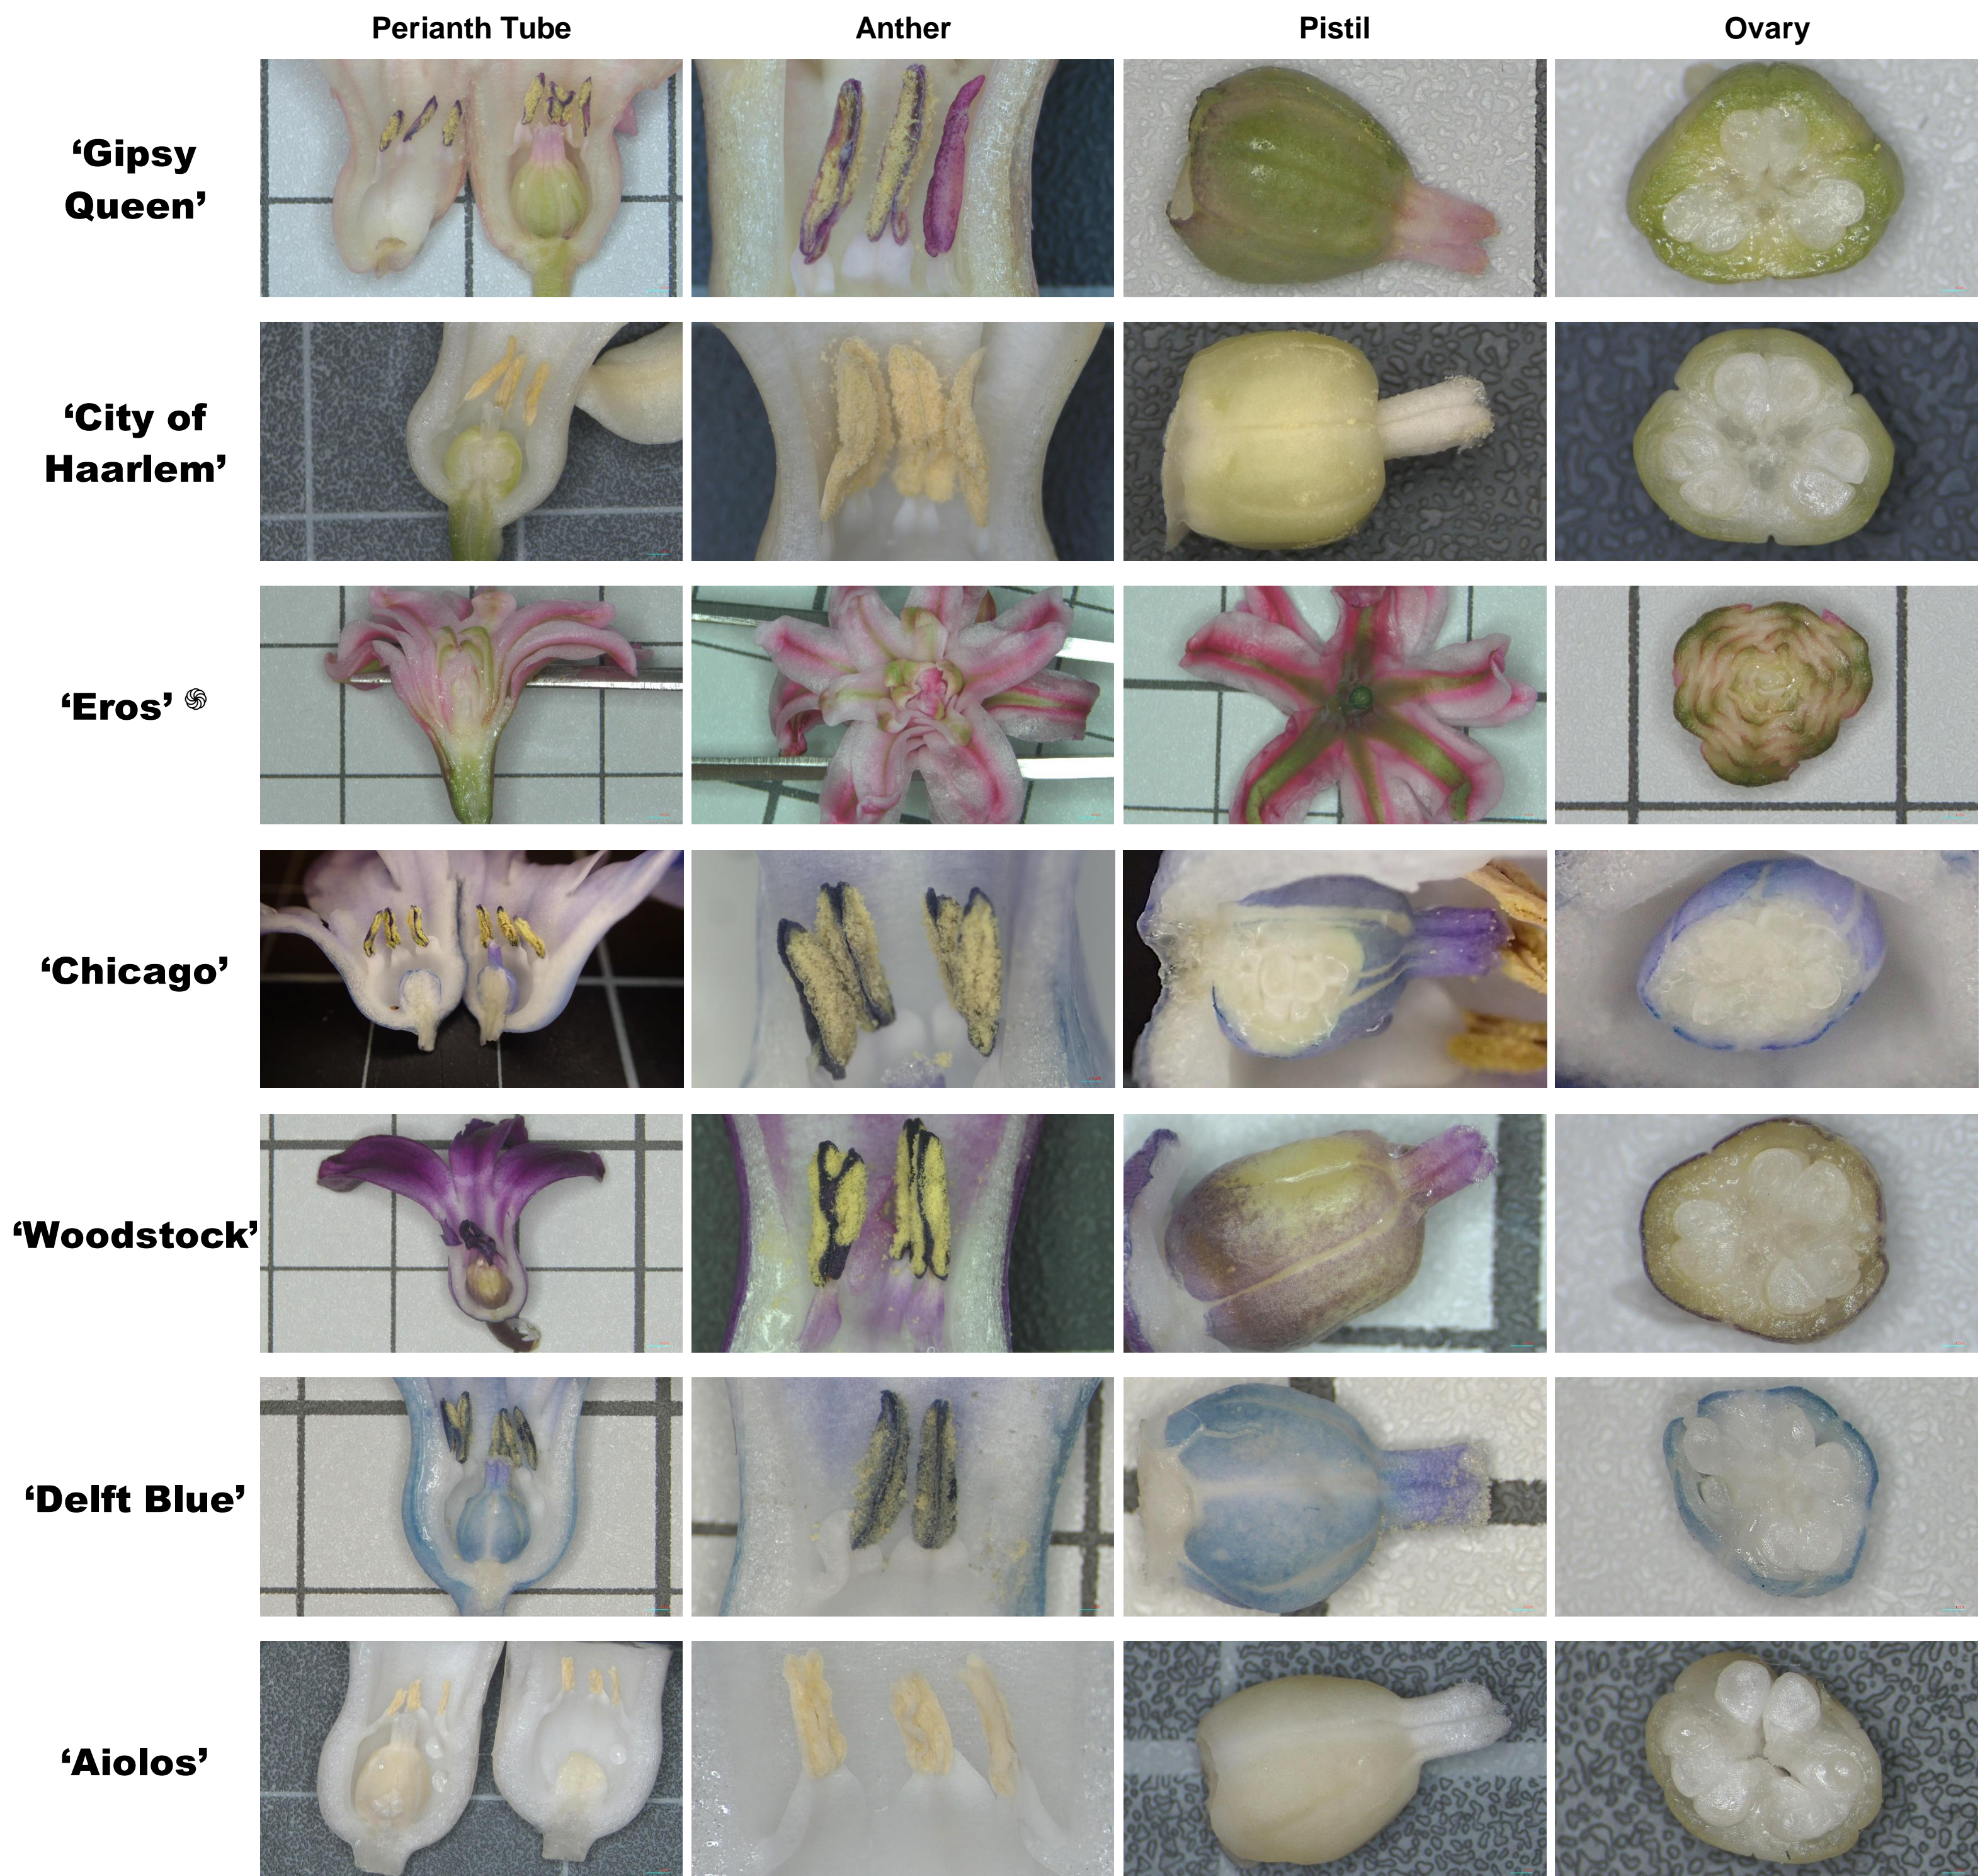

☞ For the cultivar ‘Eros’, no anther, pistils and ovules were observed after dissected. The photos for ‘Eros’ from left to right were the longitudinal section of perianth tube, top view of corolla, bottom view of corolla and the transverse section of perianth tube.

**Figure S2 – Microscopic observation of the seven studied *Hyacinthus* cultivars**
