# Supplementary material
Source: MDPI journal article supplement (https://www.mdpi.com/2311-7524/8/5/453)
Supplement: s1 [file s1 › Figure_S1.pdf]

**Figure S1 – Voucher specimens of  
K. H. Wong 127, 139, 144, 047, 114,  
118, 120, 126 and 141**

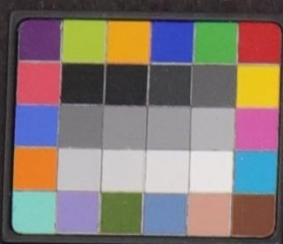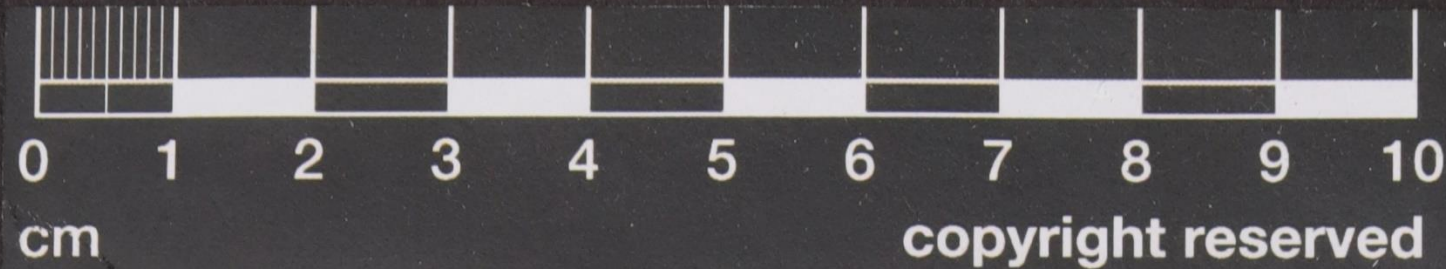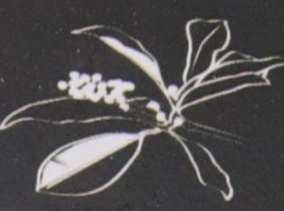

胡秀英植物標本館  
SHIU-YING HU HERBARIUM

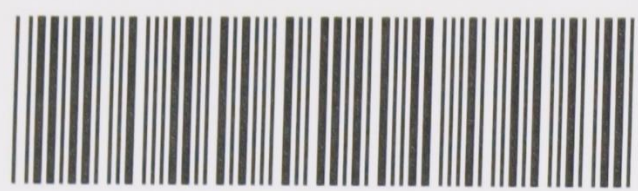

CUHK05312

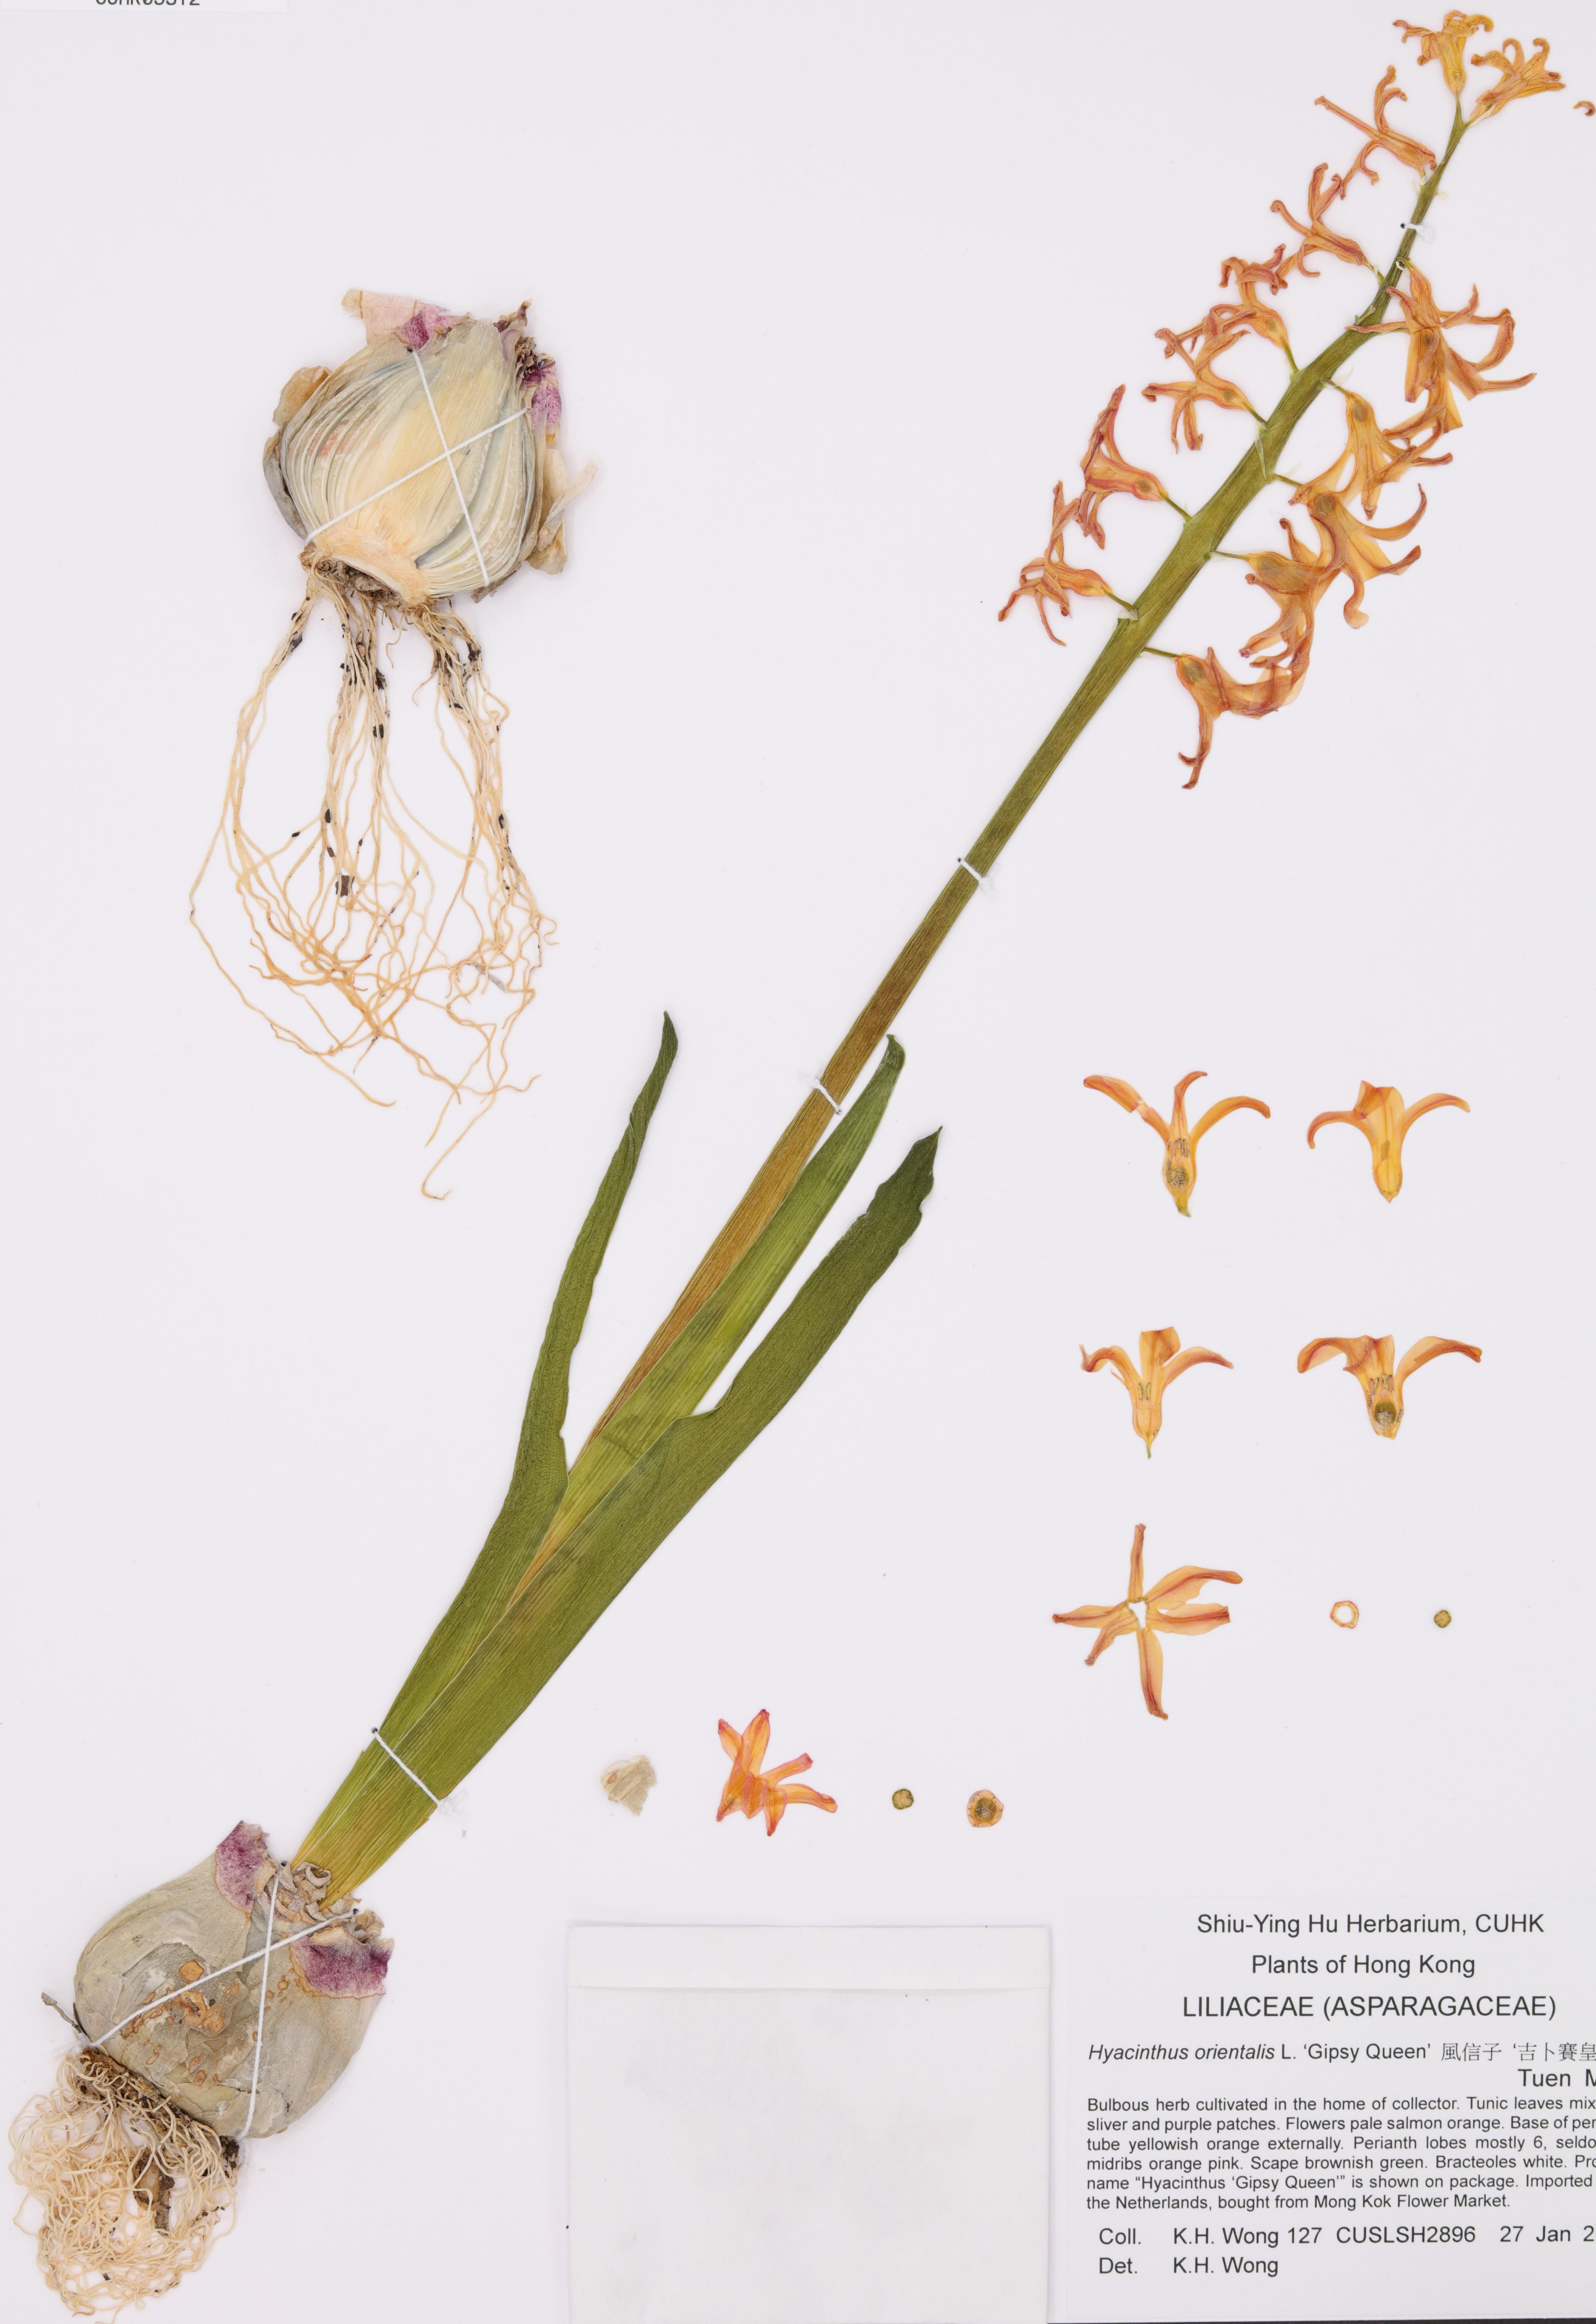

Shiu-Ying Hu Herbarium, CUHK

Plants of Hong Kong

LILIACEAE (ASPARAGACEAE)

*Hyacinthus orientalis* L. 'Gipsy Queen' 風信子 '吉卜賽皇后'

Tuen Mun

Bulbous herb cultivated in the home of collector. Tunic leaves mixed in silver and purple patches. Flowers pale salmon orange. Base of perianth tube yellowish orange externally. Perianth lobes mostly 6, seldom 8, midribs orange pink. Scape brownish green. Bracteoles white. Product name "Hyacinthus 'Gipsy Queen'" is shown on package. Imported from the Netherlands, bought from Mong Kok Flower Market.

Coll. K.H. Wong 127 CUSLSH2896 27 Jan 2021

Det. K.H. Wong

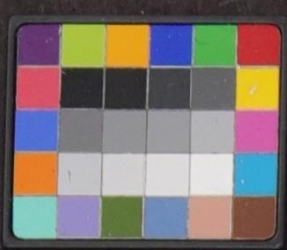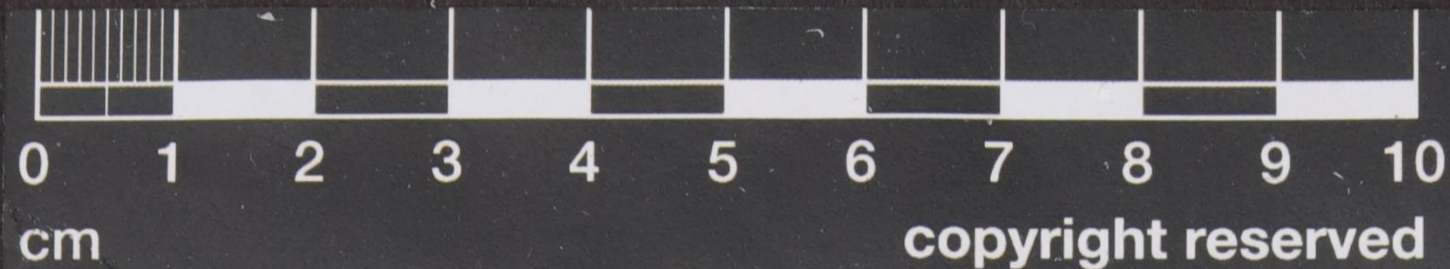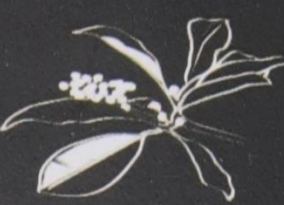

胡秀英植物標本館  
SHIU-YING HU HERBARIUM

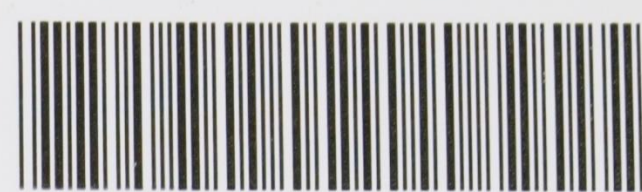

CUHK05574

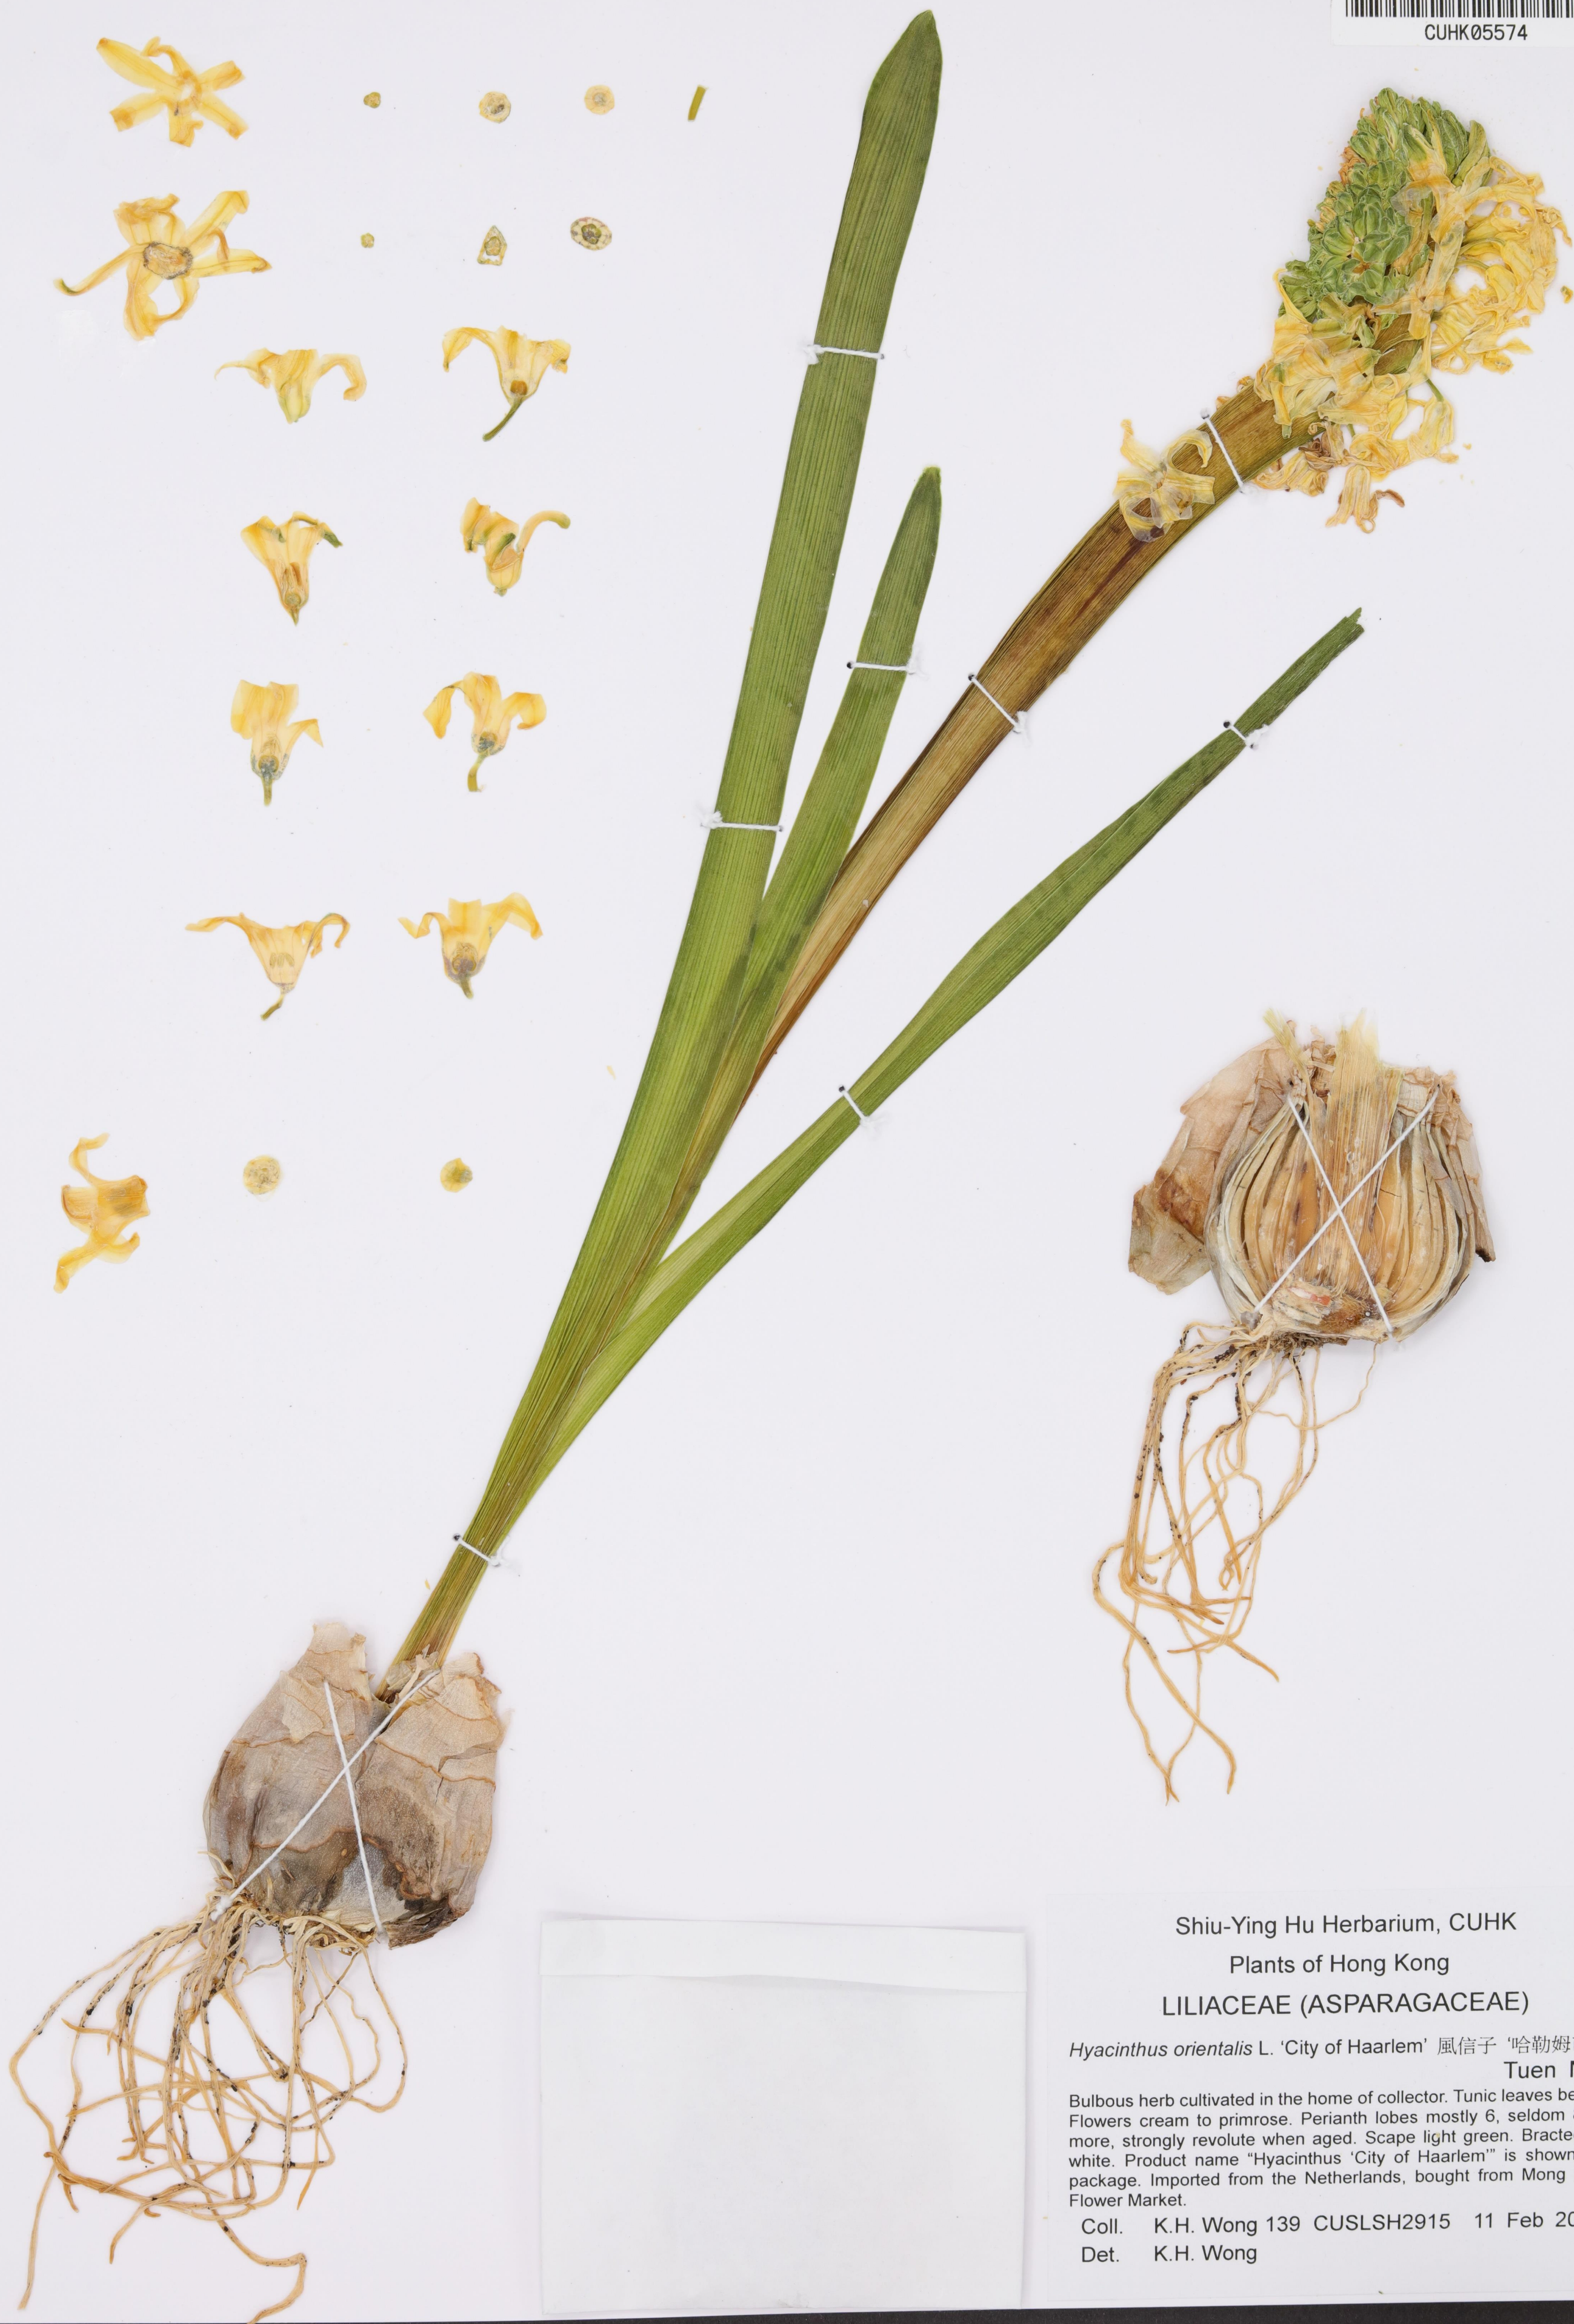

Shiu-Ying Hu Herbarium, CUHK

Plants of Hong Kong

LILIACEAE (ASPARAGACEAE)

*Hyacinthus orientalis* L. 'City of Haarlem' 風信子 '哈勒姆市'

Tuen Mun

Bulbous herb cultivated in the home of collector. Tunic leaves beige. Flowers cream to primrose. Perianth lobes mostly 6, seldom 8 or more, strongly revolute when aged. Scape light green. Bracteoles white. Product name "Hyacinthus 'City of Haarlem'" is shown on package. Imported from the Netherlands, bought from Mong Kok Flower Market.

Coll. K.H. Wong 139 CUSLSH2915 11 Feb 2021

Det. K.H. Wong

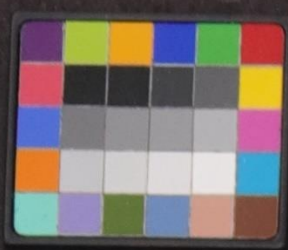

0 1 2 3 4 5 6 7 8 9 10  
cm  
copyright reserved

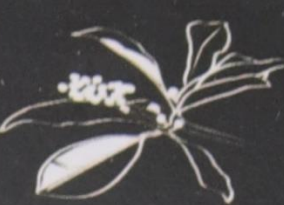

胡秀英植物標本館  
SHIU-YING HU HERBARIUM

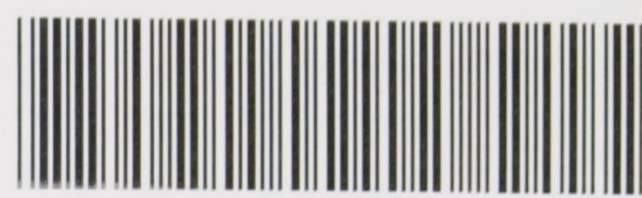

CUHK05309

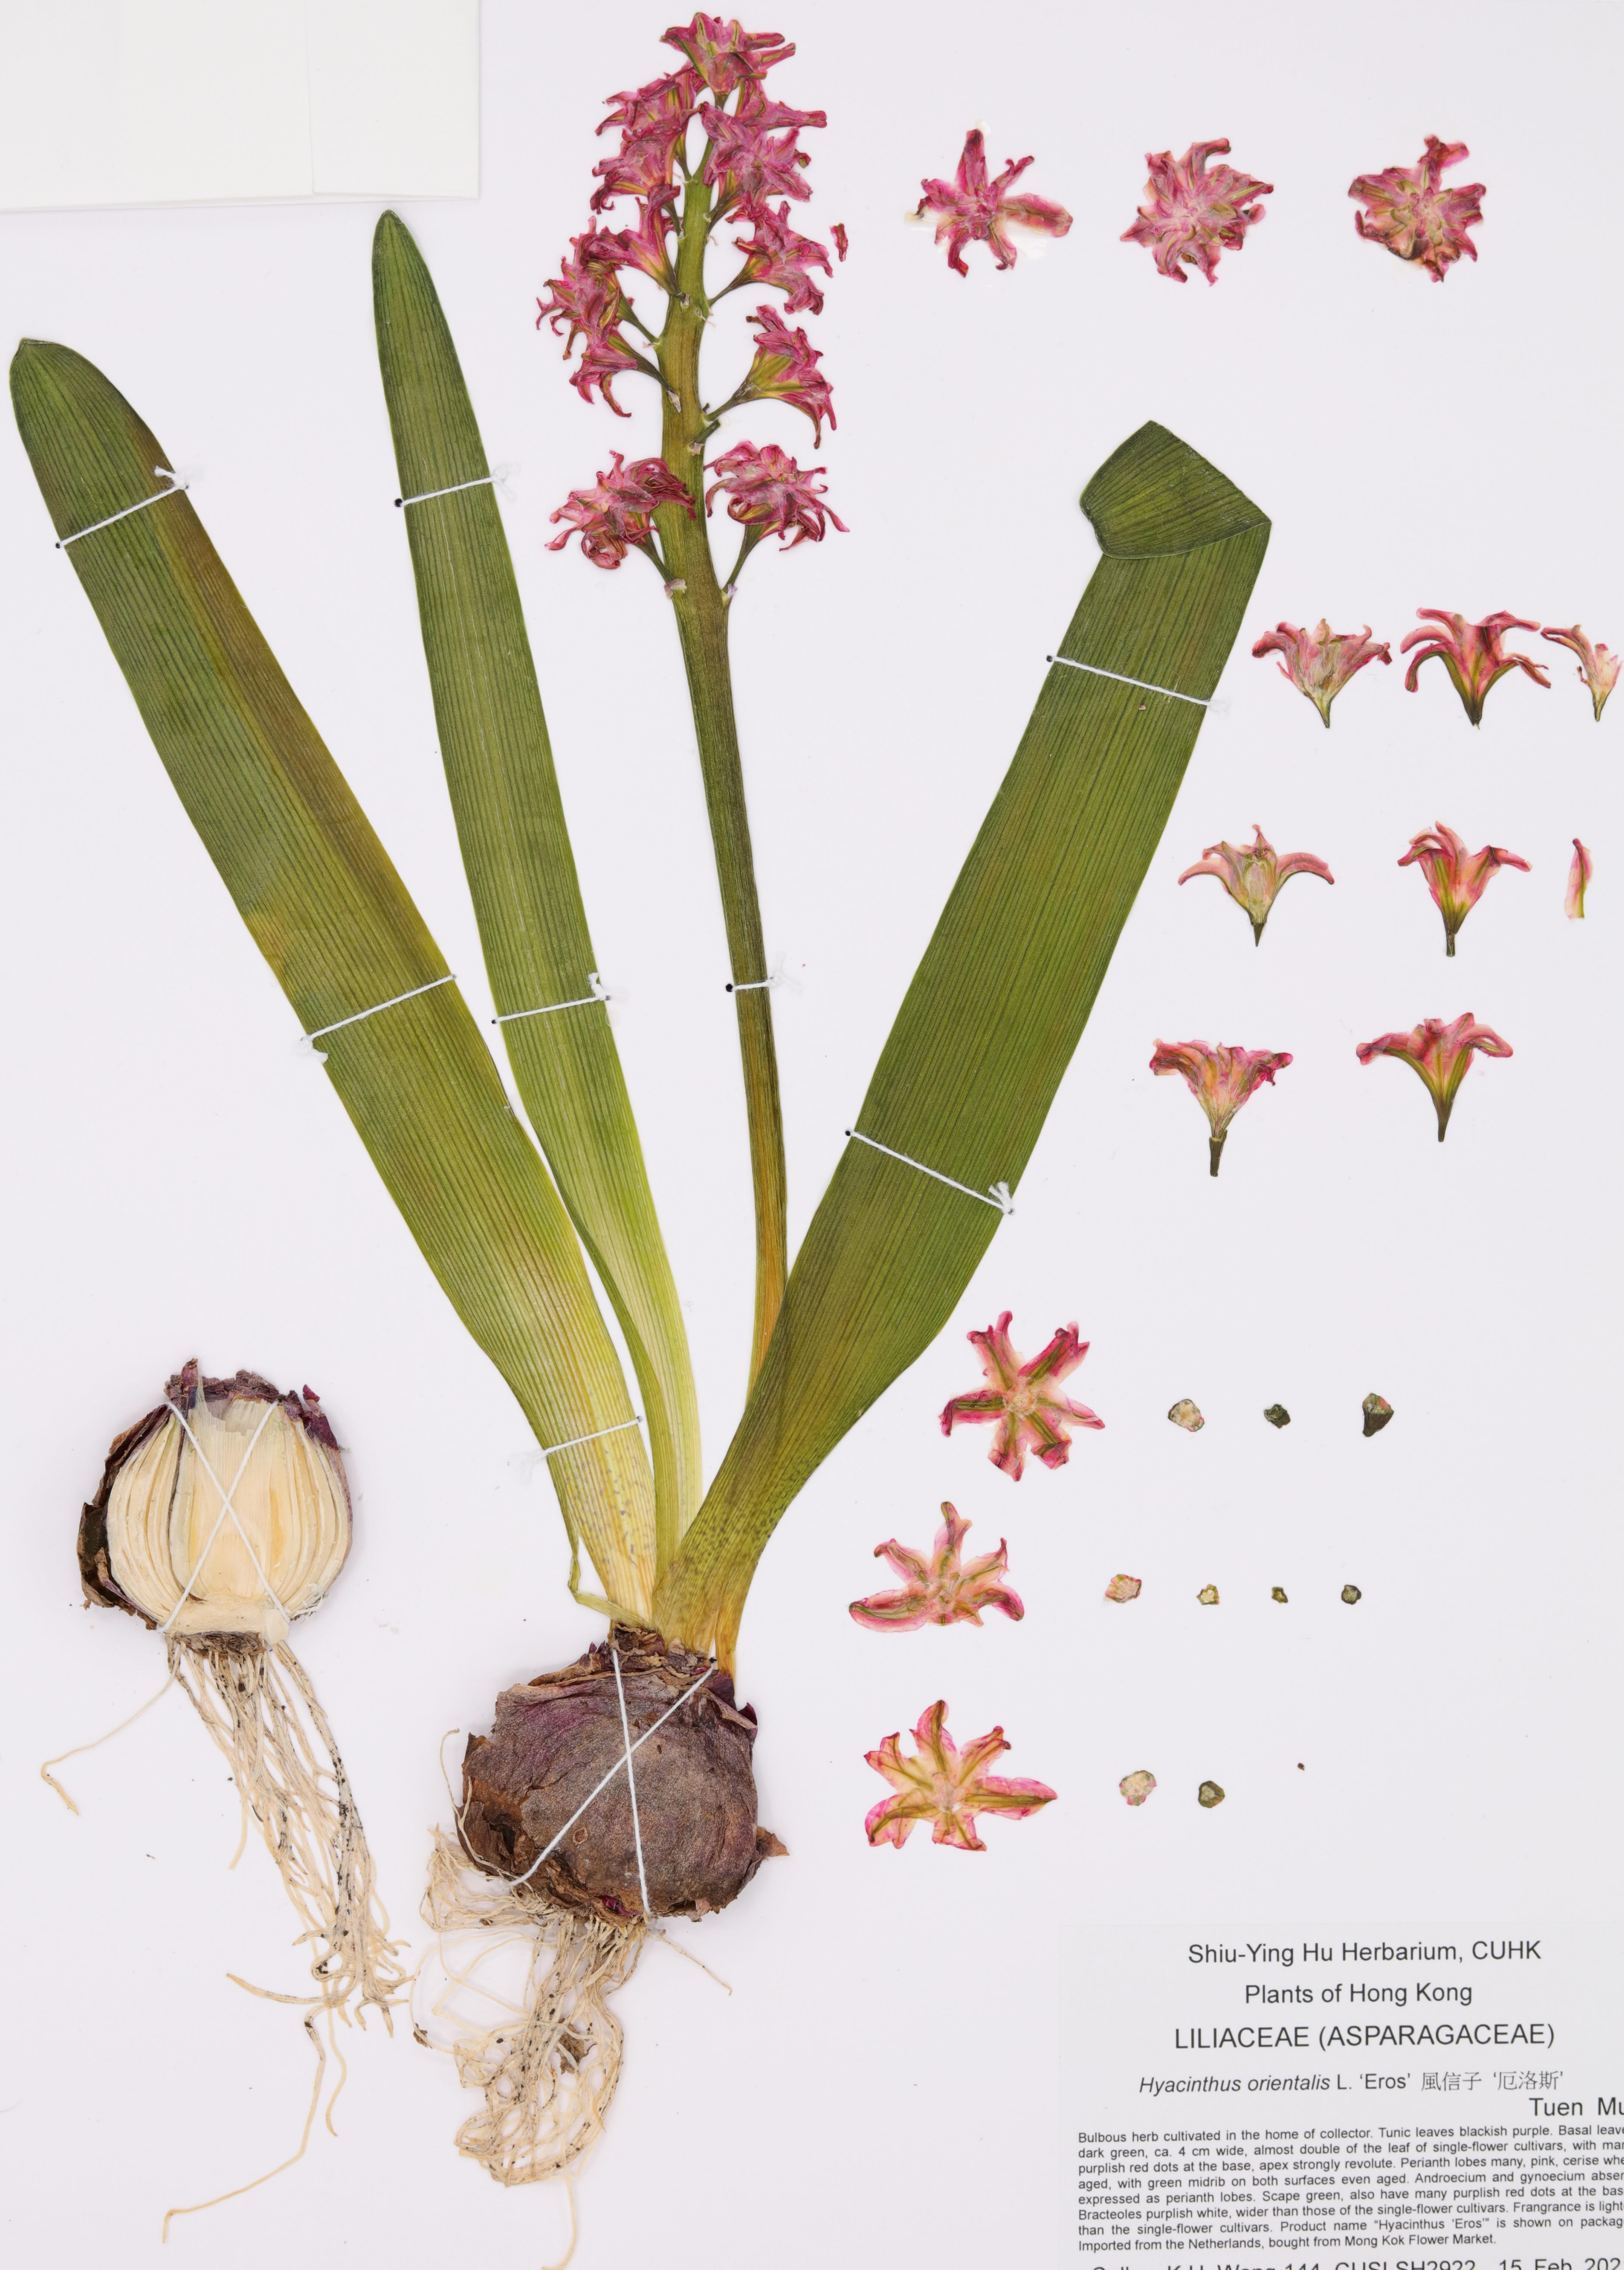

Shiu-Ying Hu Herbarium, CUHK

Plants of Hong Kong

LILIACEAE (ASPARAGACEAE)

*Hyacinthus orientalis* L. 'Eros' 風信子 '厄洛斯'

Tuen Mun

Bulbous herb cultivated in the home of collector. Tunic leaves blackish purple. Basal leaves dark green, ca. 4 cm wide, almost double of the leaf of single-flower cultivars, with many purplish red dots at the base, apex strongly revolute. Perianth lobes many, pink, cerise when aged, with green midrib on both surfaces even aged. Androecium and gynoecium absent, expressed as perianth lobes. Scape green, also have many purplish red dots at the base. Bracteoles purplish white, wider than those of the single-flower cultivars. Fragrance is lighter than the single-flower cultivars. Product name "Hyacinthus 'Eros'" is shown on package. Imported from the Netherlands, bought from Mong Kok Flower Market.

Coll. K.H. Wong 144 CUSLSH2922 15 Feb 2021  
Det. K.H. Wong

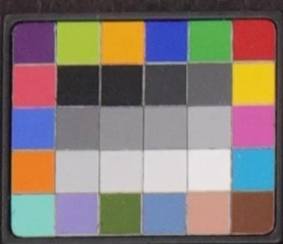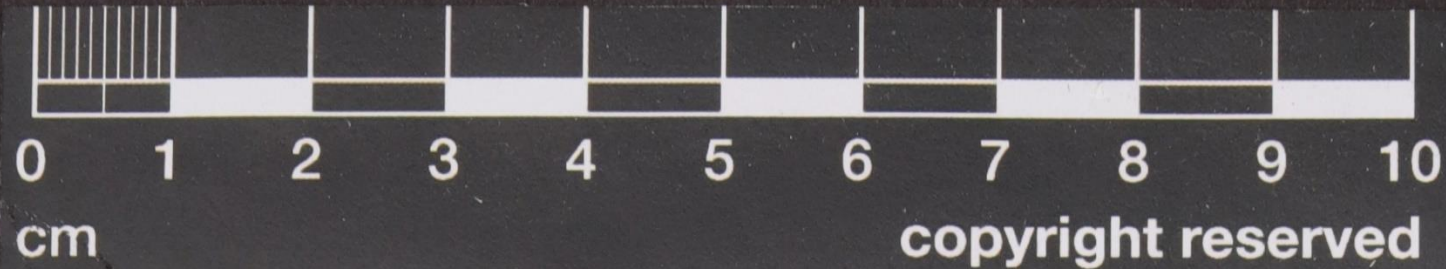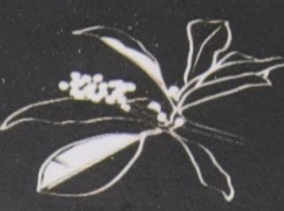

胡秀英植物標本館  
SHIU-YING HU HERBARIUM

*Hyacinthus orientalis* L. 'Chicago'

Det. K.H. Wong

Date: 08 July 2021

Shiu-Ying Hu Herbarium, School of Life Sciences, CUHK

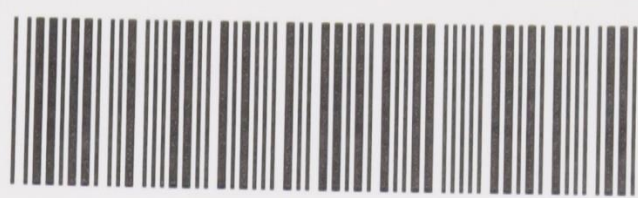

CUHK05305

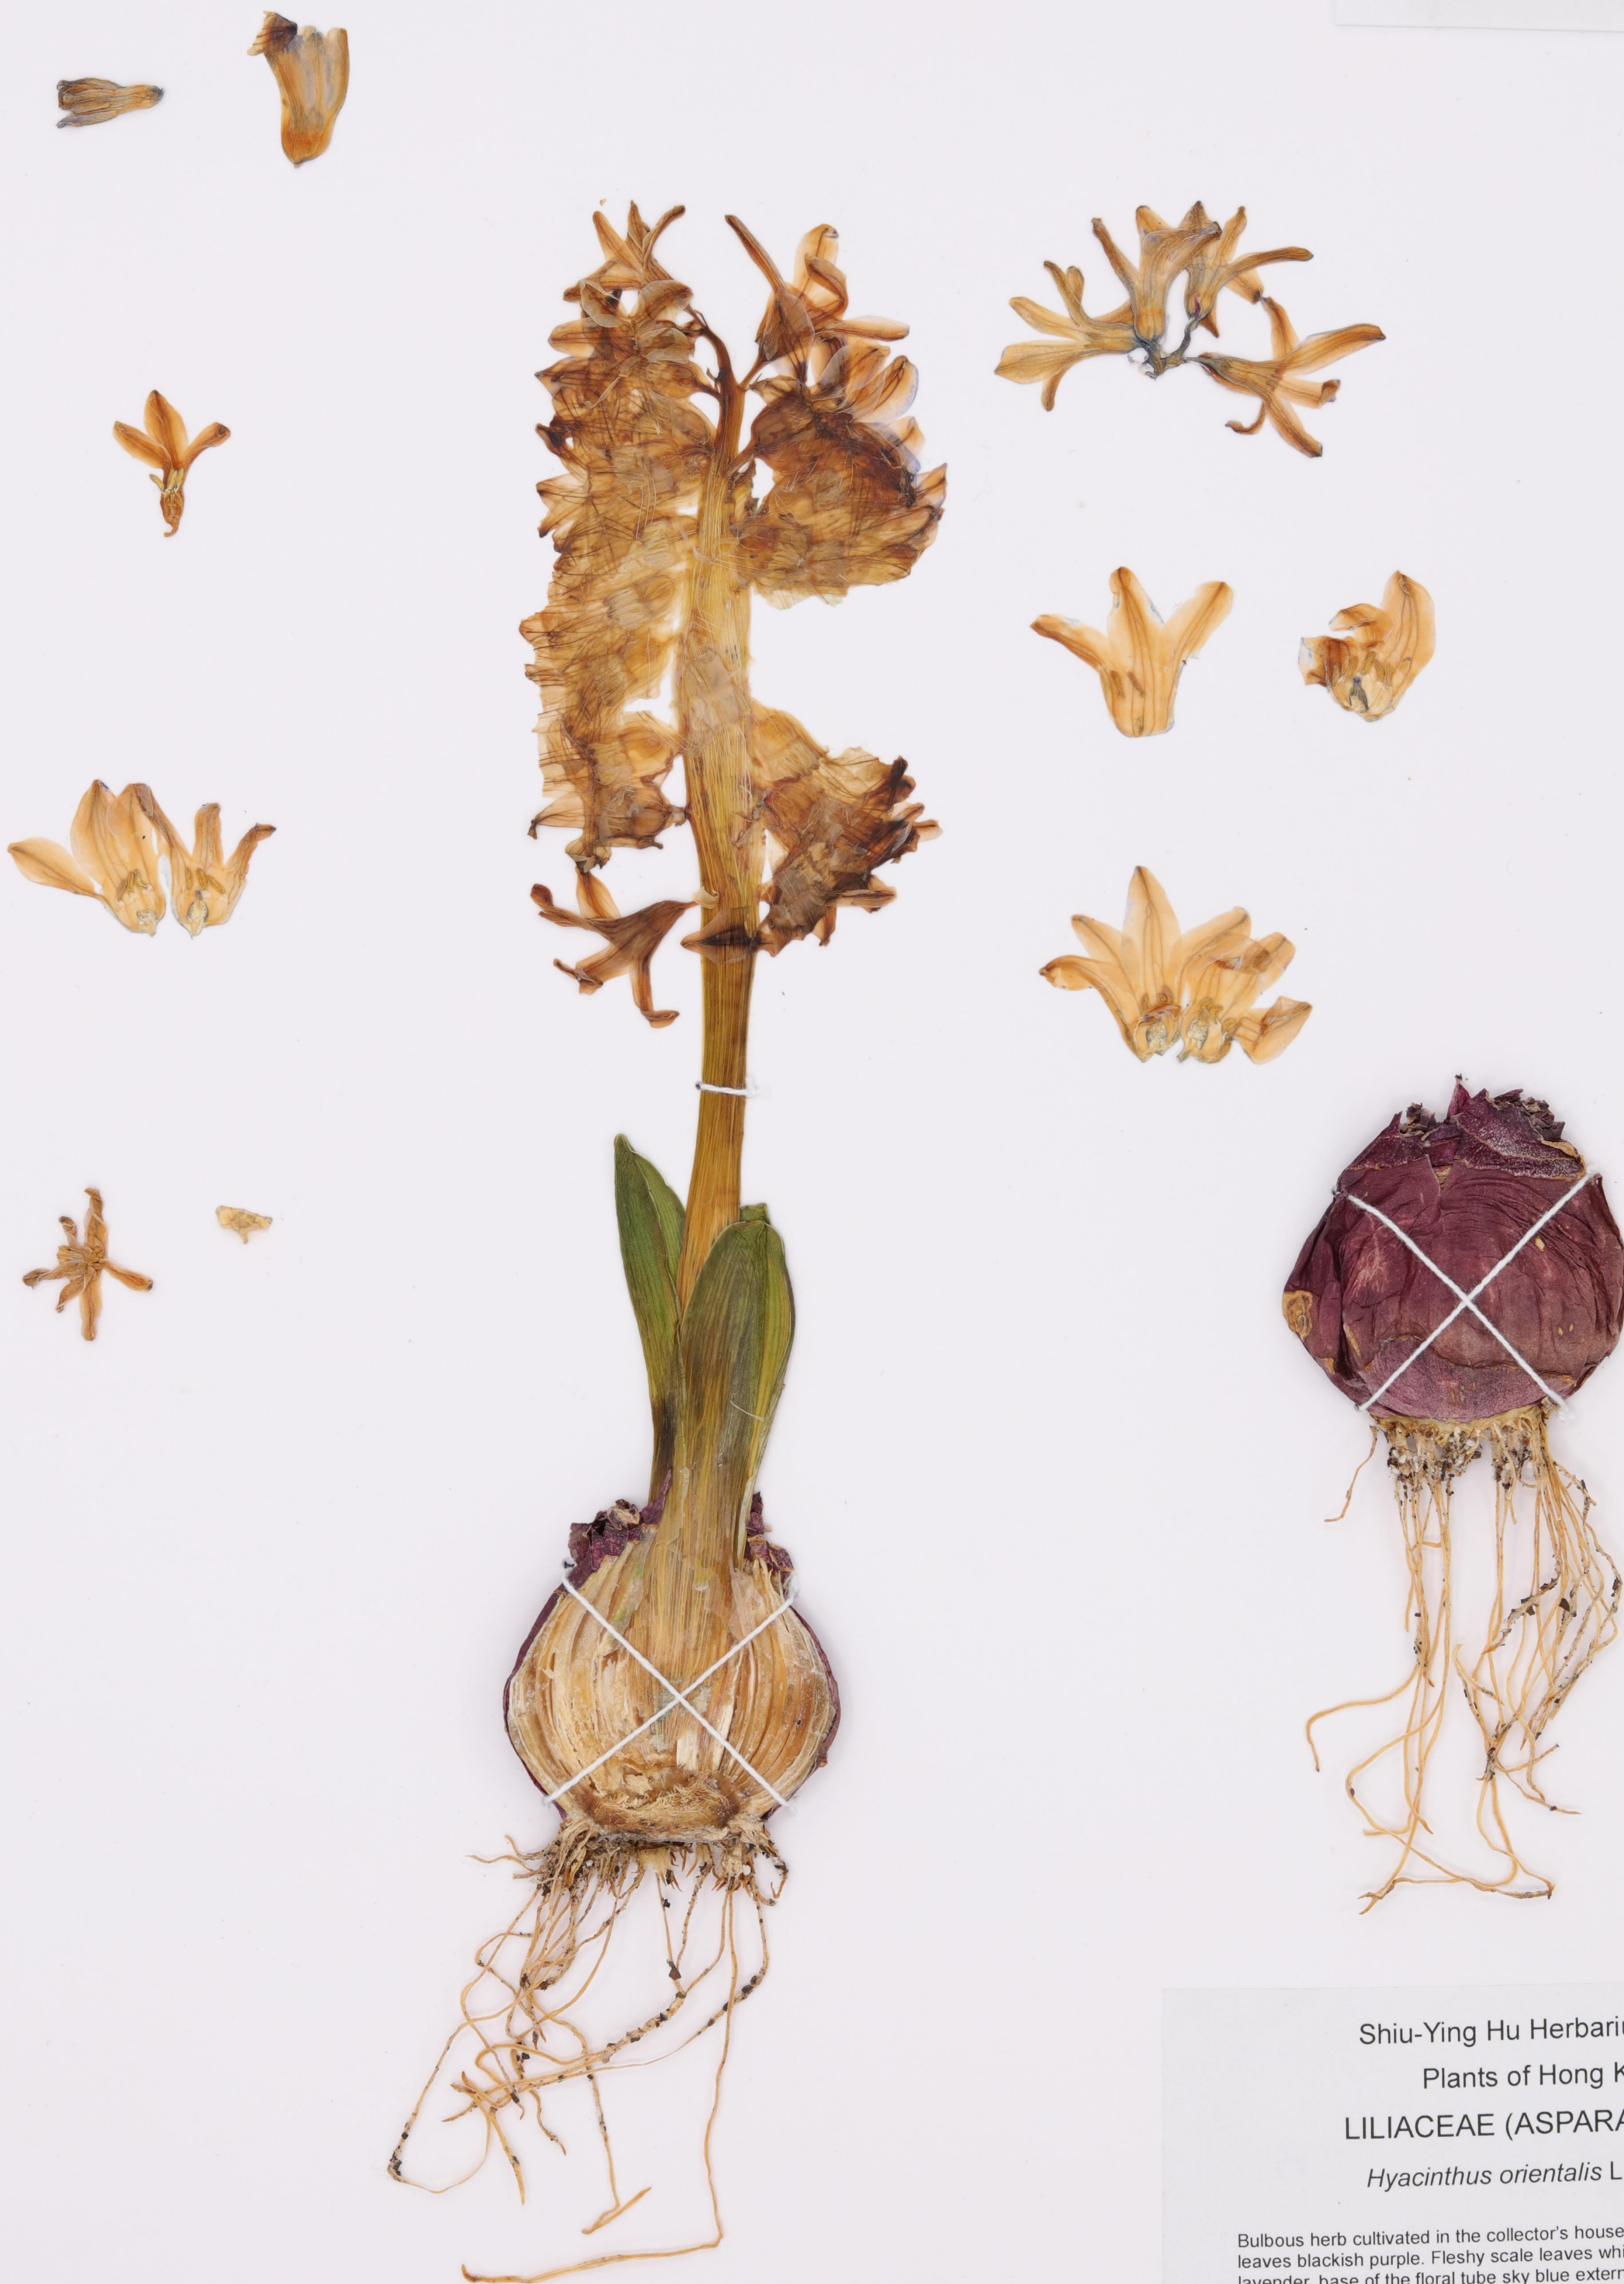

Shiu-Ying Hu Herbarium, CUHK  
Plants of Hong Kong  
LILIACEAE (ASPARAGACEAE)

*Hyacinthus orientalis* L. 風信子

Tuen Mun

Bulbous herb cultivated in the collector's house, glabrous throughout. Tunic leaves blackish purple. Fleshy scale leaves white. Roots white. Flower pale lavender, base of the floral tube sky blue externally. Scape dark purple. Petals mostly 6, seldom 8. Bracteoles plaque-like on the lower scape, filiform on the upper scape, both white. Cultivar name 'Chicago' as shown on the product package. Imported from the Netherlands.

Coll. K.H. Wong 047 CUSLSH2460 22 Jan 2020  
Det. K.H. Wong

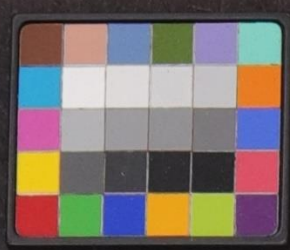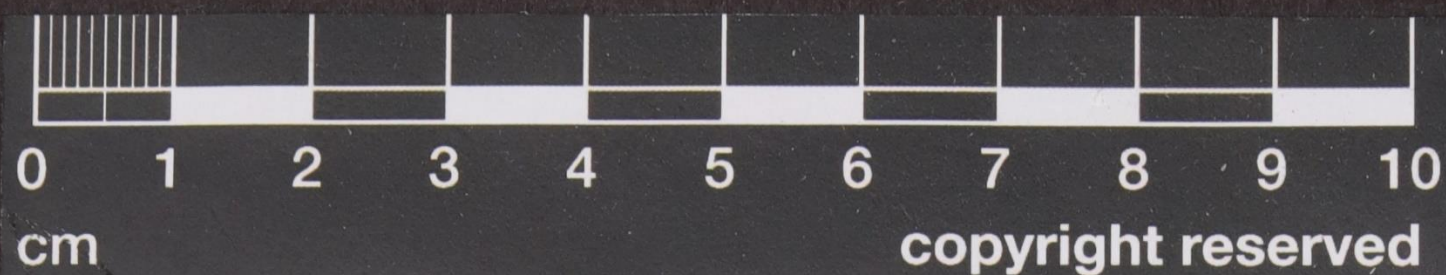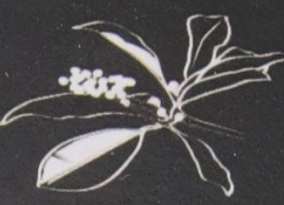

胡秀英植物標本館  
SHIU-YING HU HERBARIUM

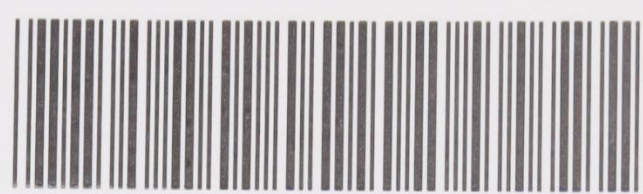

CUHK05317

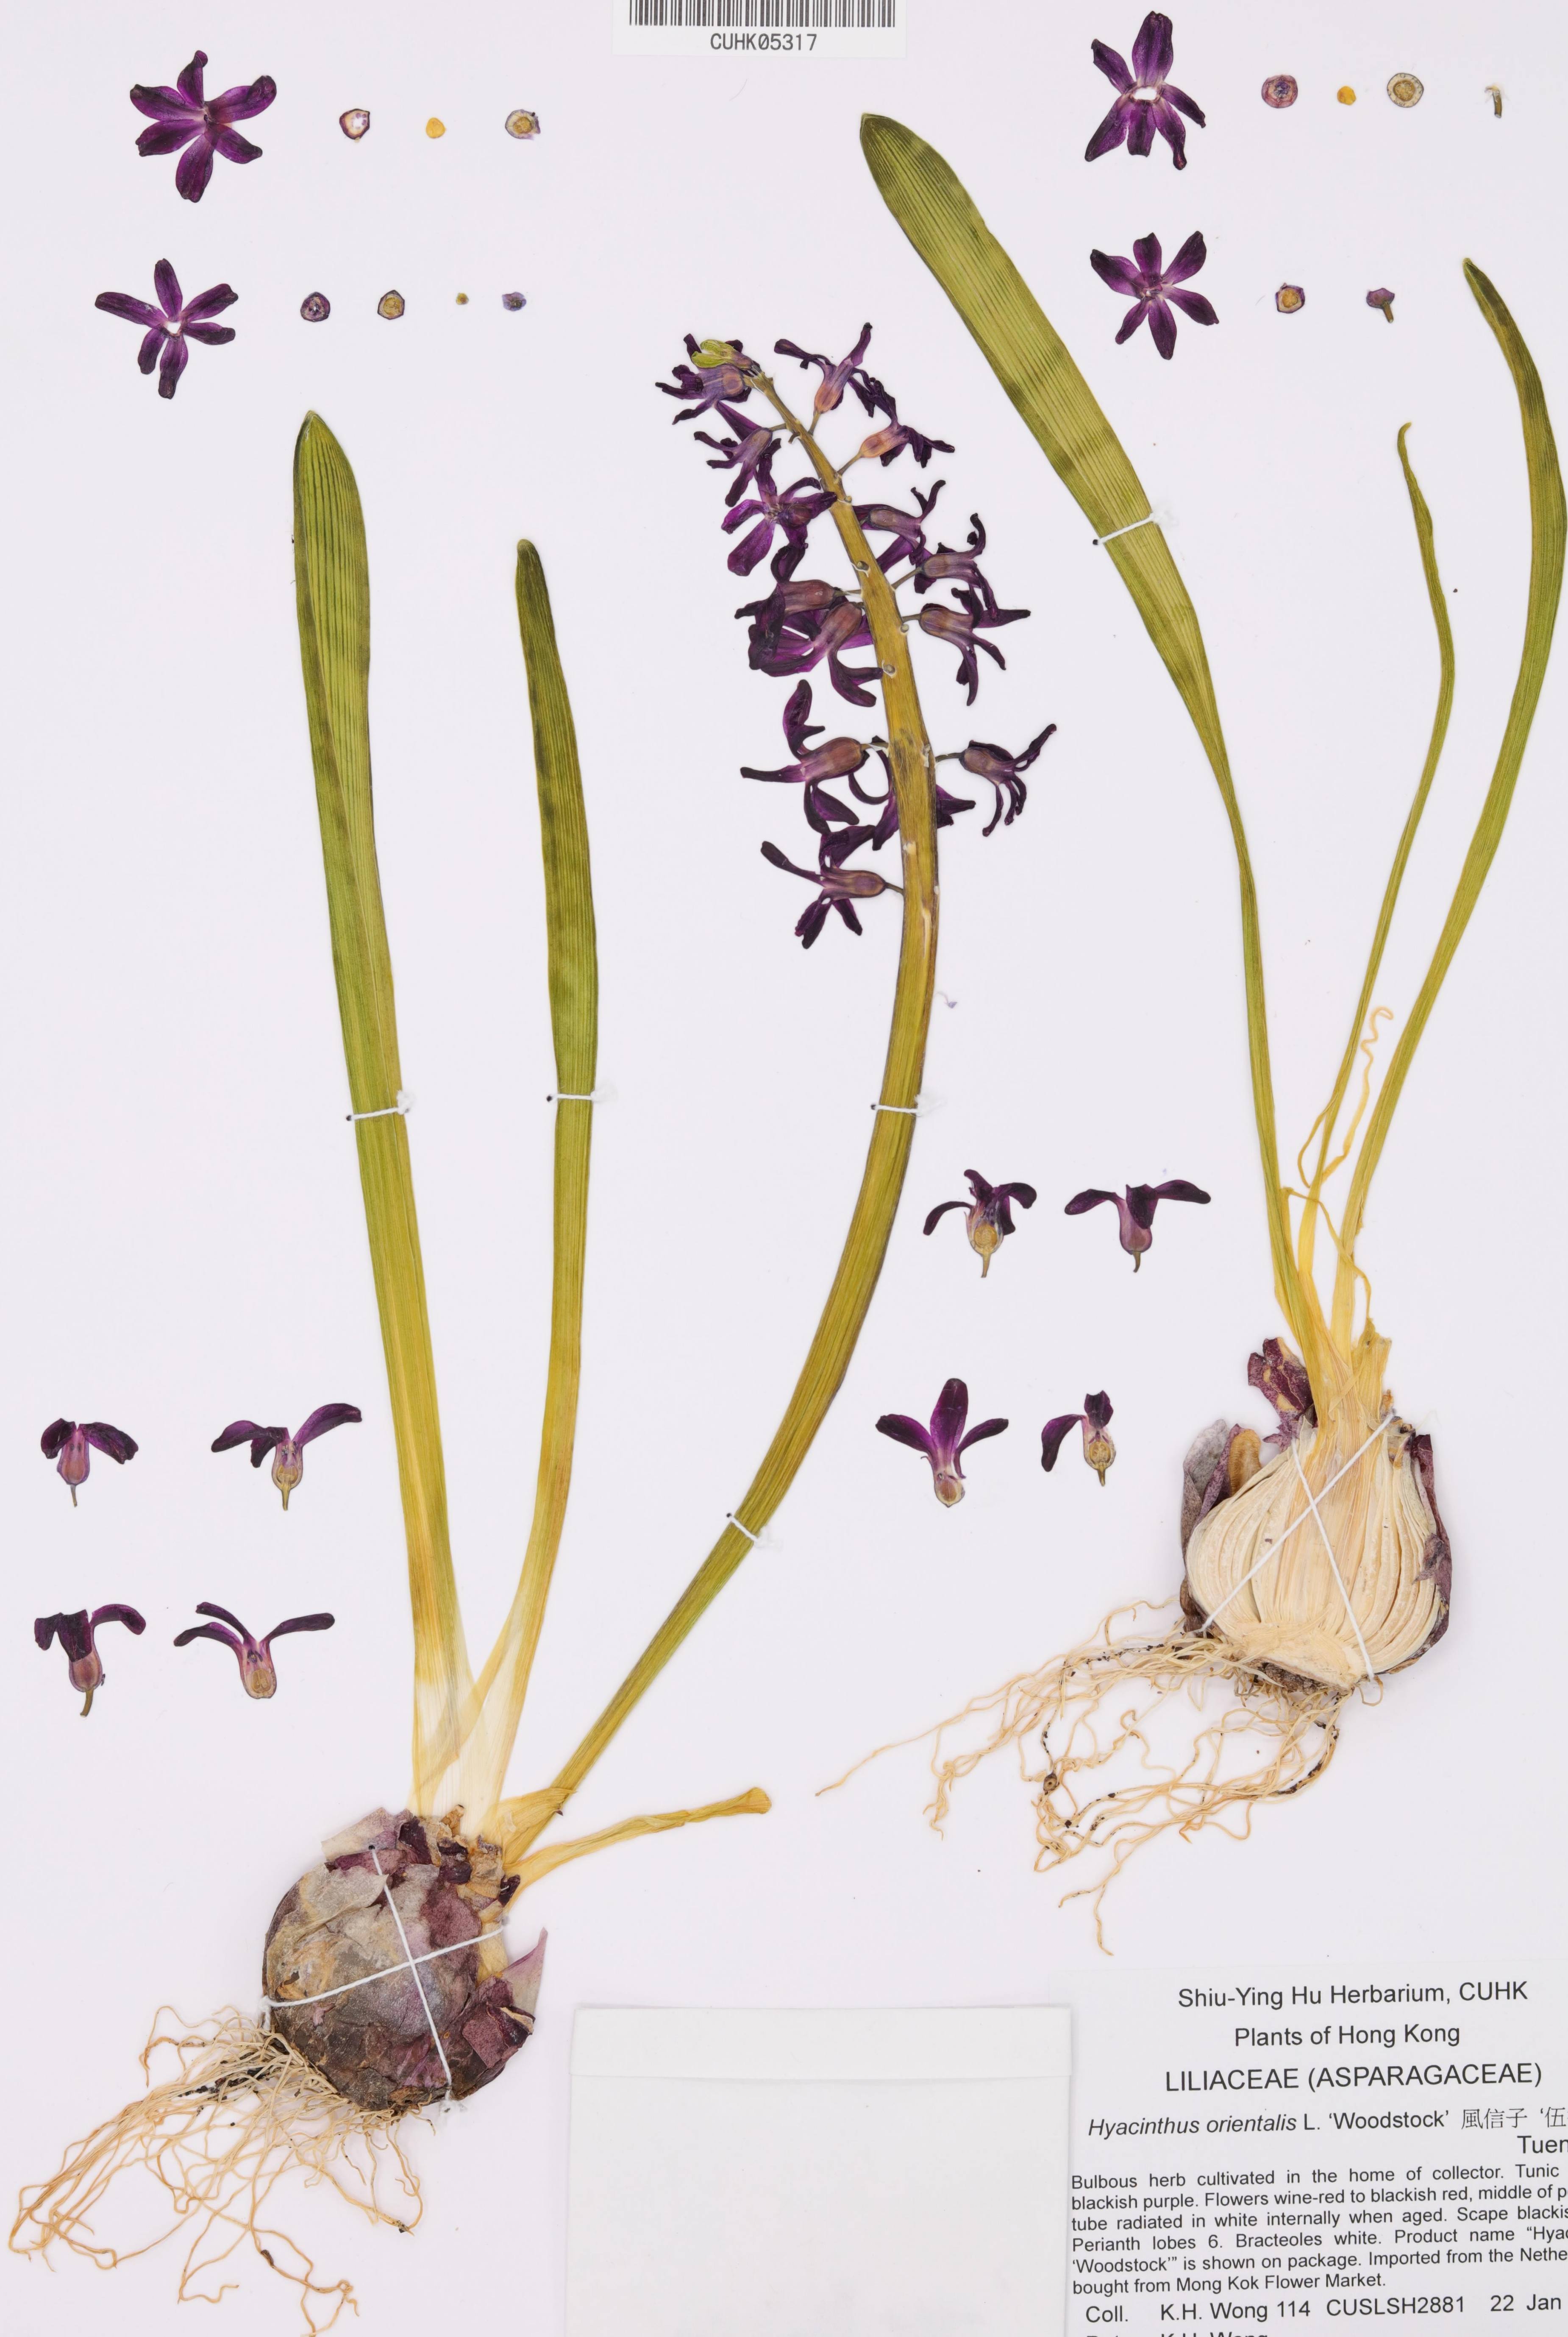

Shiu-Ying Hu Herbarium, CUHK

Plants of Hong Kong

LILIACEAE (ASPARAGACEAE)

*Hyacinthus orientalis* L. 'Woodstock' 風信子 '伍德' Tuen Mun

Bulbous herb cultivated in the home of collector. Tunic leaves blackish purple. Flowers wine-red to blackish red, middle of perianth tube radiated in white internally when aged. Scape blackish red. Perianth lobes 6. Bracteoles white. Product name "Hyacinthus 'Woodstock'" is shown on package. Imported from the Netherlands, bought from Mong Kok Flower Market.

Coll. K.H. Wong 114 CUSLSH2881 22 Jan 2021

Det. K.H. Wong

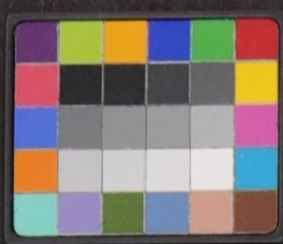

0 1 2 3 4 5 6 7 8 9 10  
cm  
copyright reserved

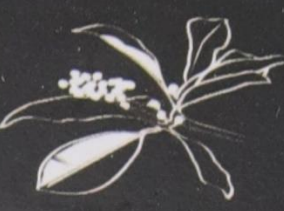

胡秀英植物標本館  
SHIU-YING HU HERBARIUM

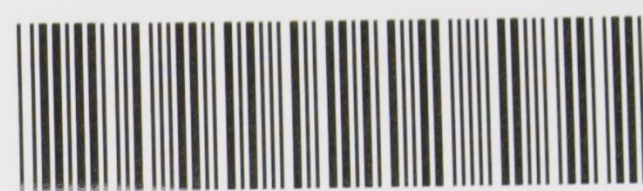

CUHK05307

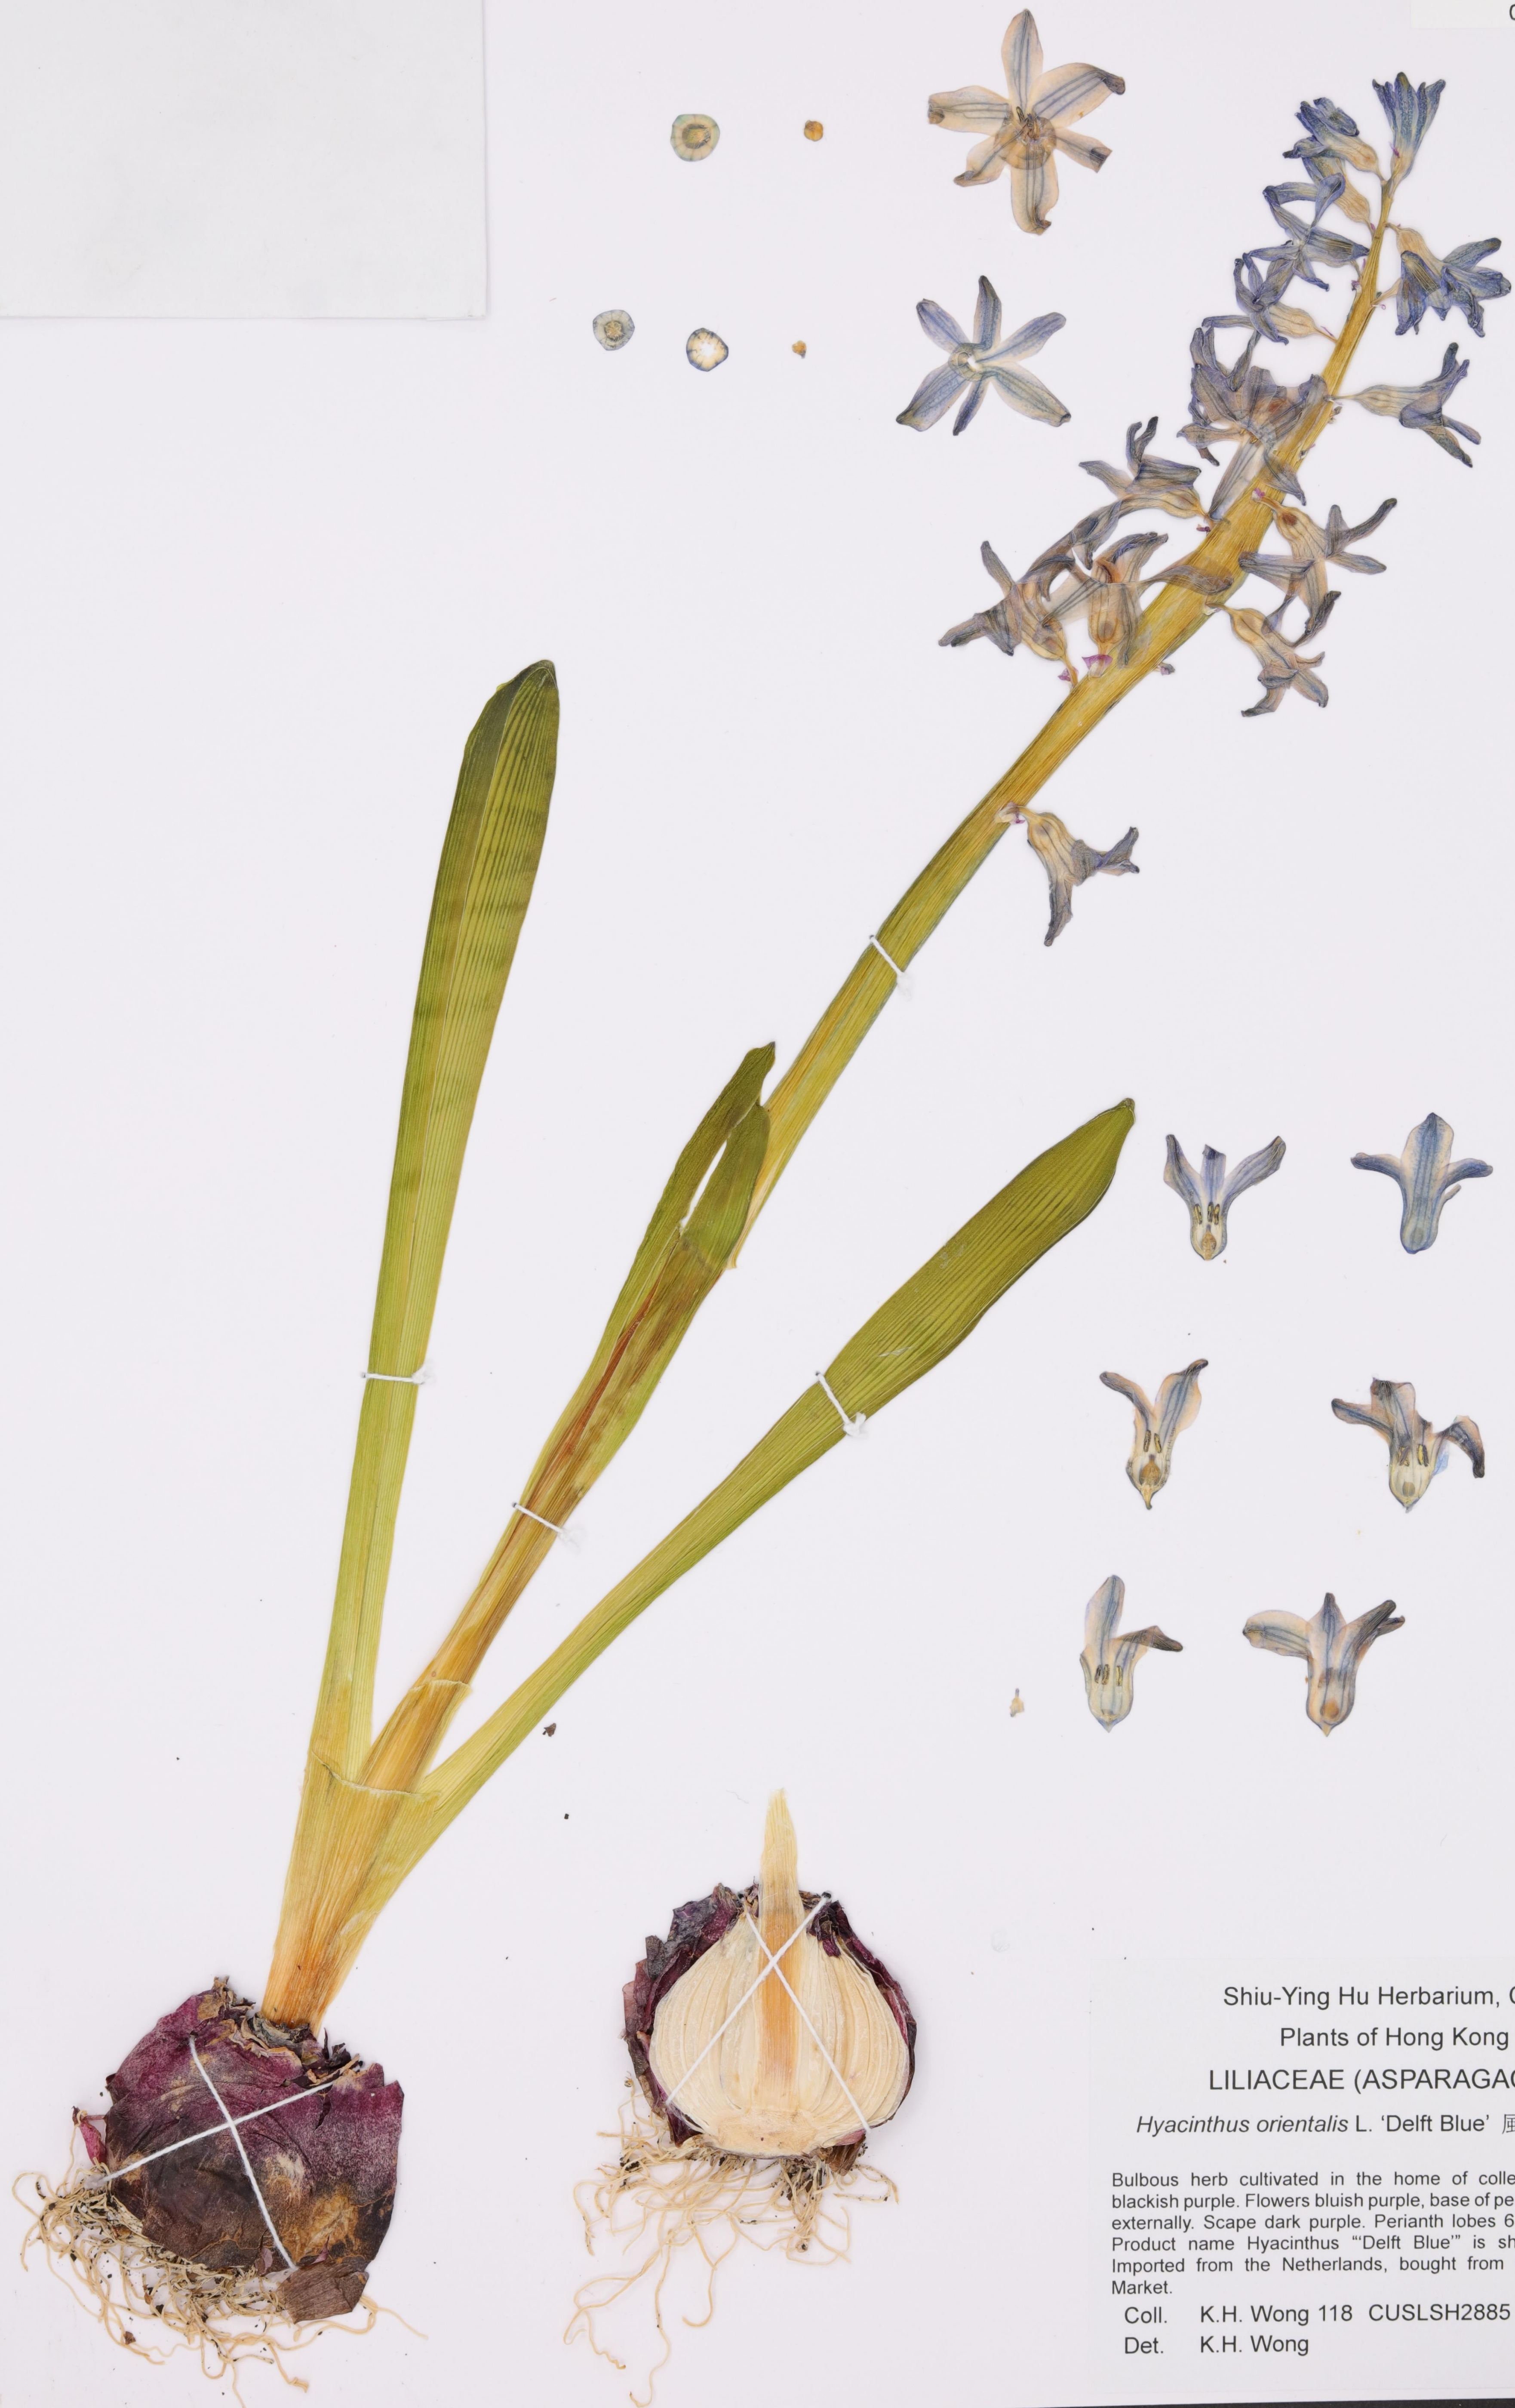

Shiu-Ying Hu Herbarium, CUHK

Plants of Hong Kong

LILIACEAE (ASPARAGACEAE)

*Hyacinthus orientalis* L. 'Delft Blue' 風信子 '紬藍'

Tuen Mun

Bulbous herb cultivated in the home of collector. Tunic leaves blackish purple. Flowers bluish purple, base of perianth tube sky blue externally. Scape dark purple. Perianth lobes 6. Bracteoles white. Product name Hyacinthus "Delft Blue" is shown on package. Imported from the Netherlands, bought from Mong Kok Flower Market.

Coll. K.H. Wong 118 CUSLSH2885 22 Jan 2021

Det. K.H. Wong

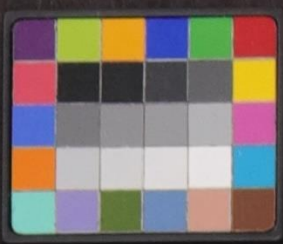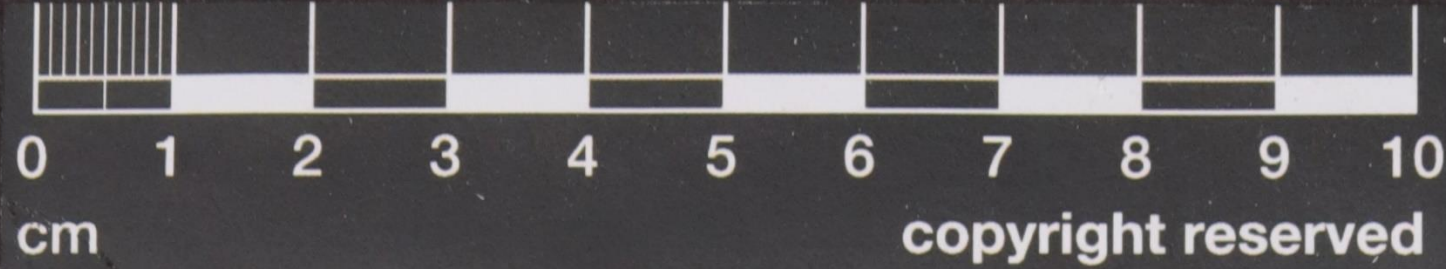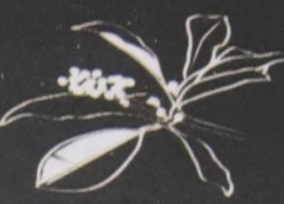

胡秀英植物標本館  
SHIU-YING HU HERBARIUM

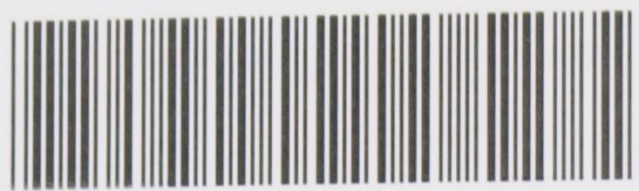

CUHK05303

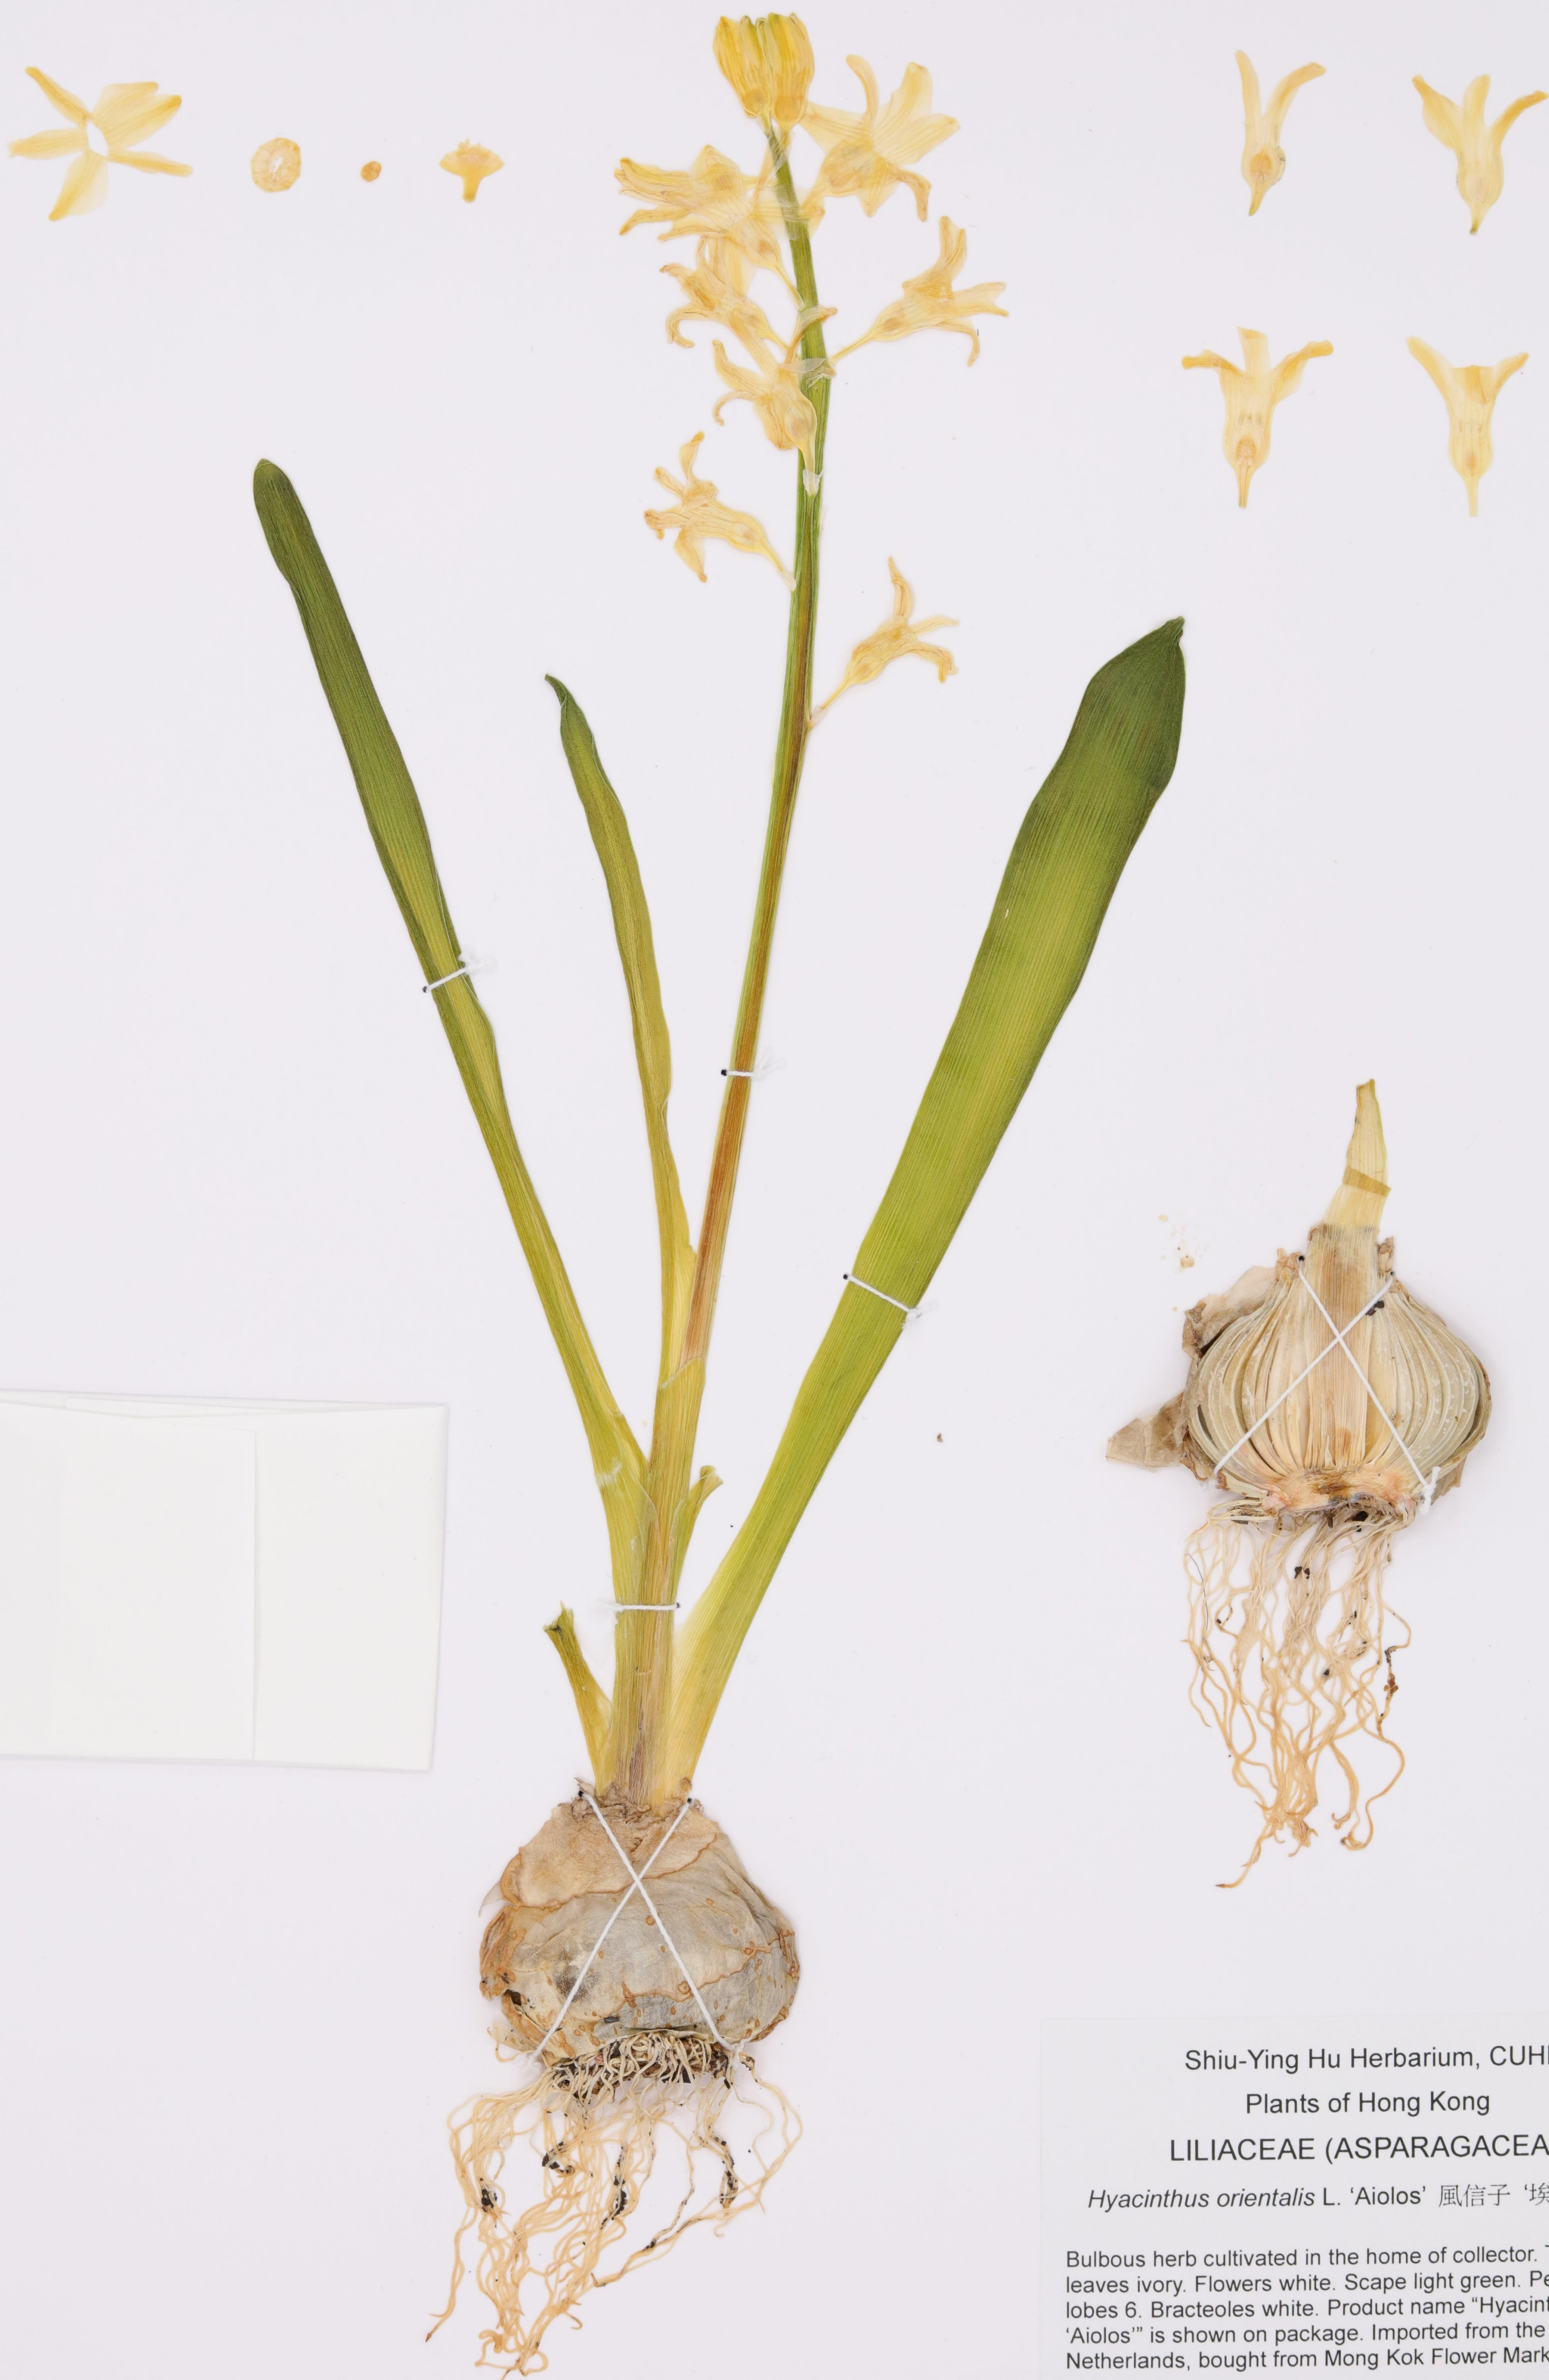

Shiu-Ying Hu Herbarium, CUHK

Plants of Hong Kong

LILIACEAE (ASPARAGACEAE)

*Hyacinthus orientalis* L. 'Aiolos' 風信子 '埃俄羅斯'

Tuen Mun

Bulbous herb cultivated in the home of collector. Tunic leaves ivory. Flowers white. Scape light green. Perianth lobes 6. Bracteoles white. Product name "Hyacinthus 'Aiolos'" is shown on package. Imported from the Netherlands, bought from Mong Kok Flower Market.

Coll. K.H. Wong 120 CUSLSH2887 22 Jan 2021

Det. K.H. Wong

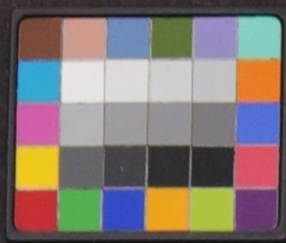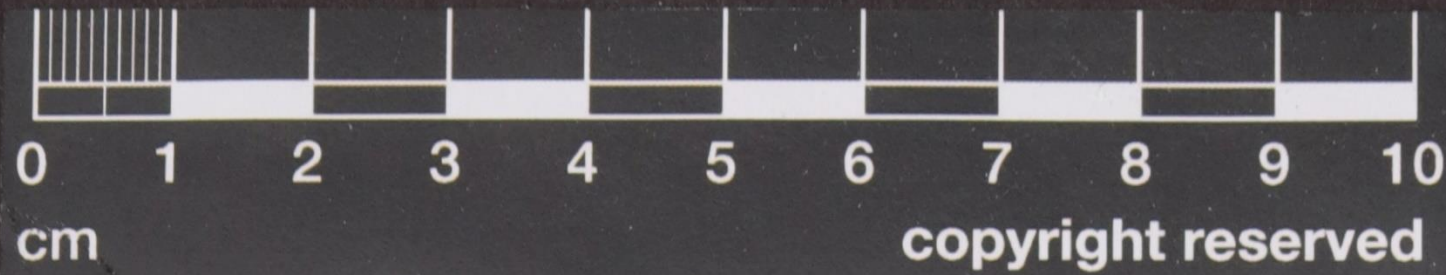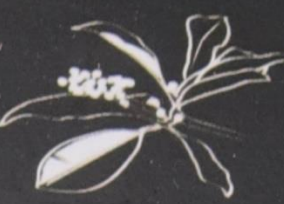

胡秀英植物標本館  
SHIU-YING HU HERBARIUM

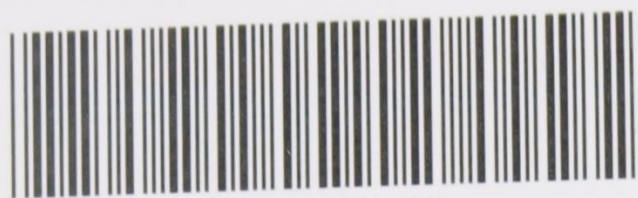

CUHK05320

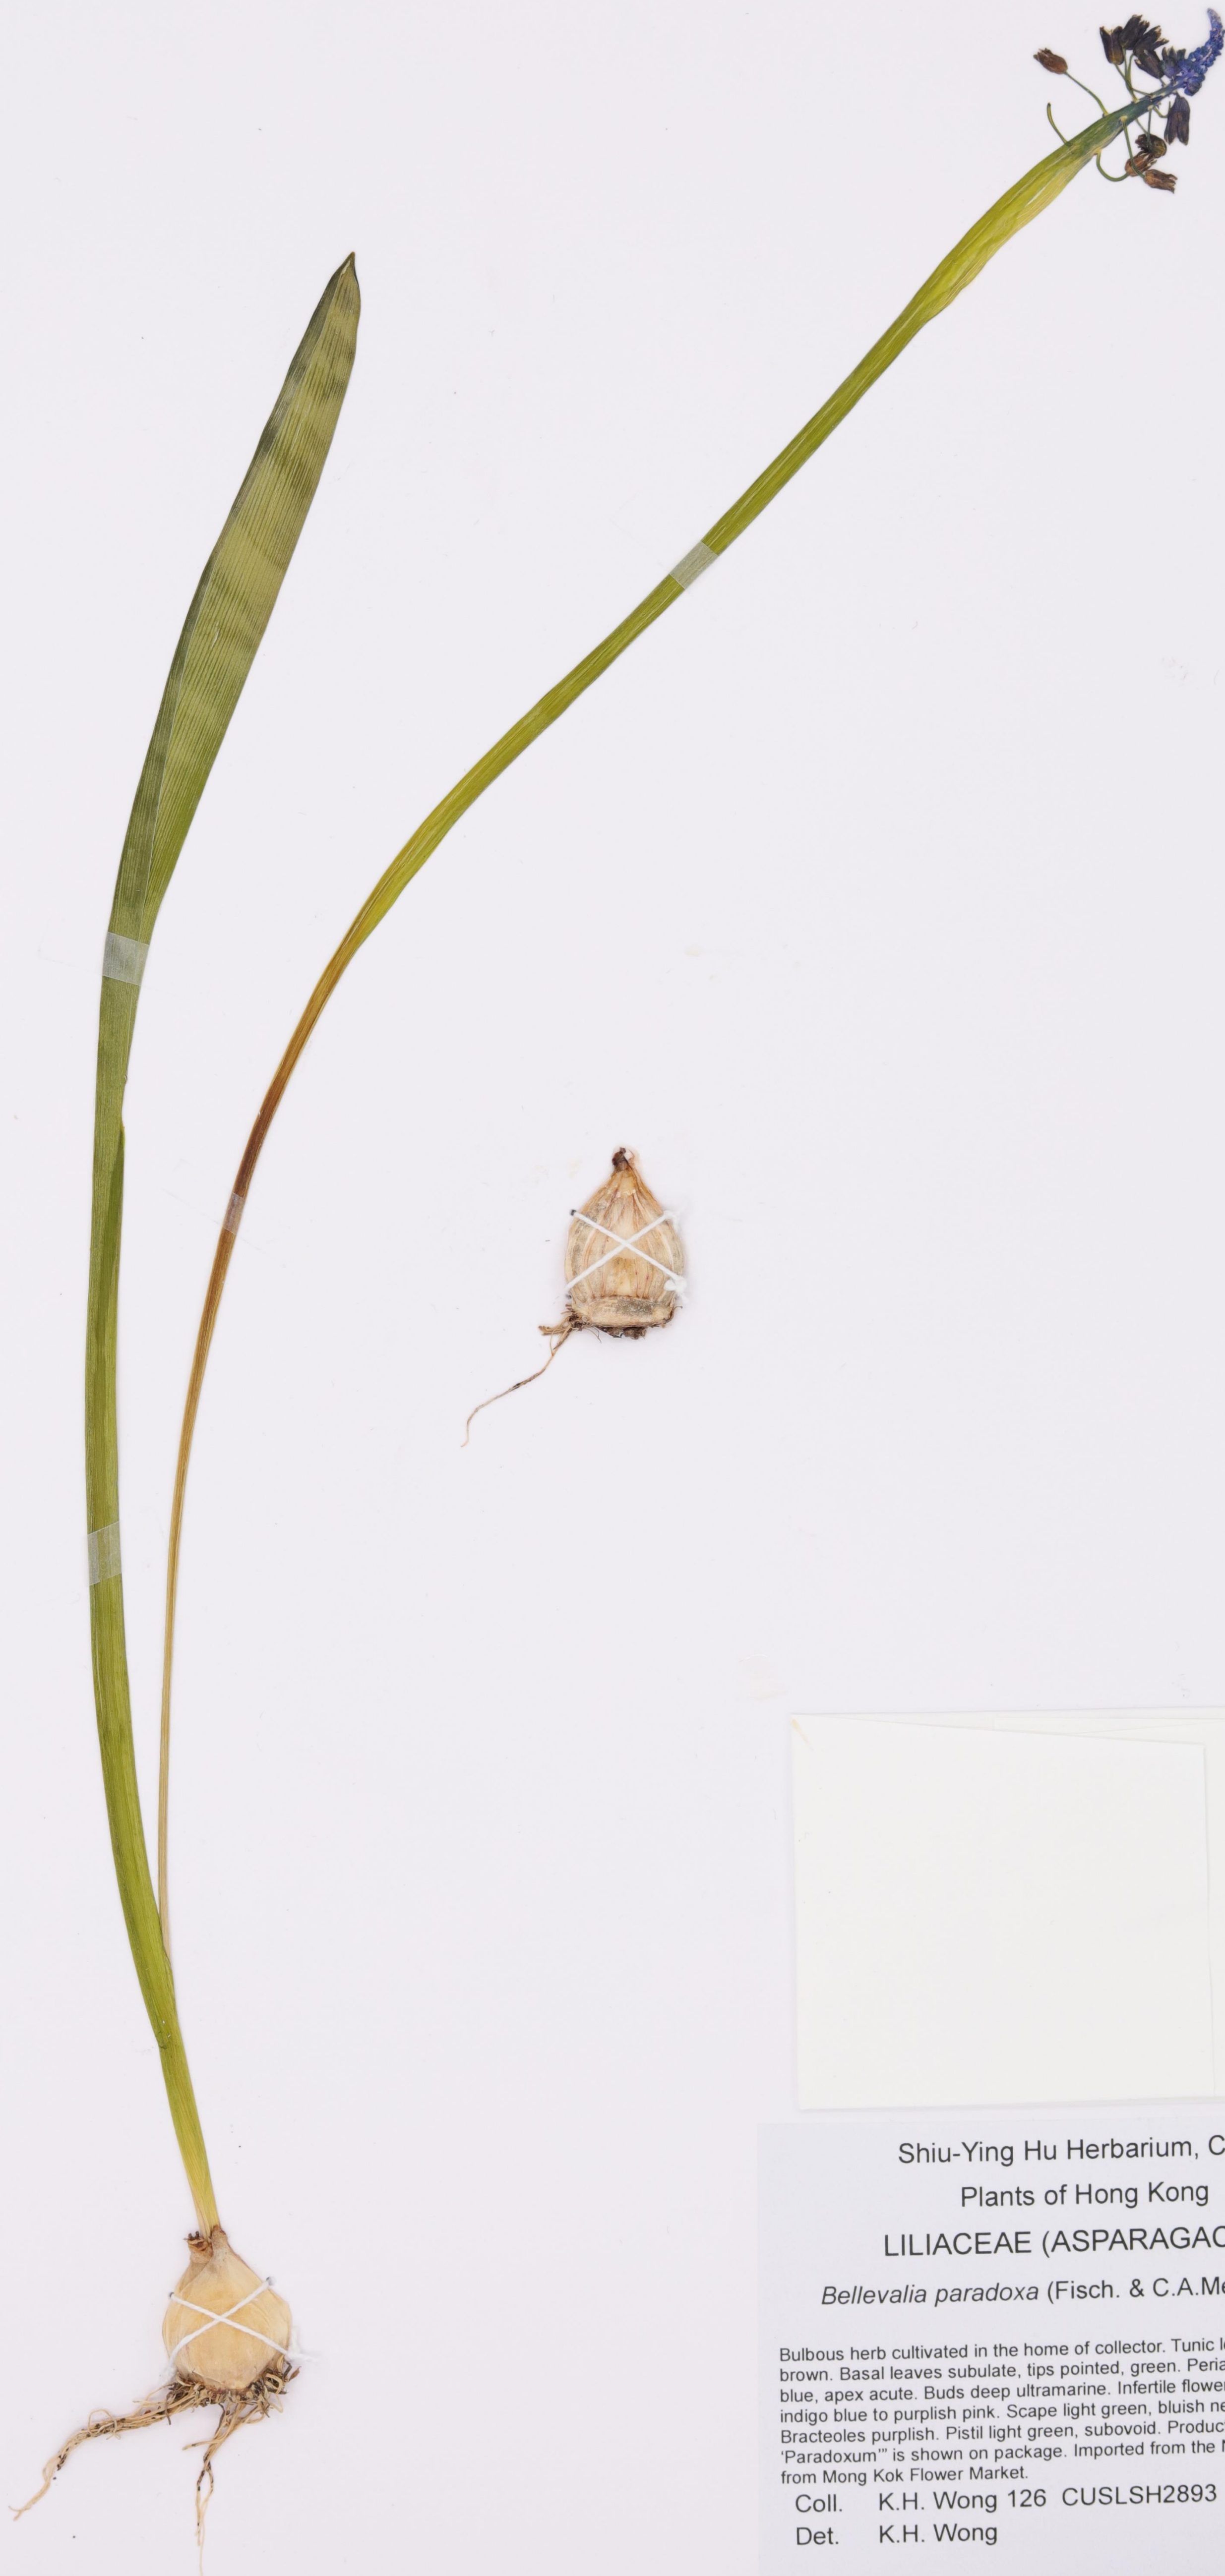

Shiu-Ying Hu Herbarium, CUHK

Plants of Hong Kong

LILIACEAE (ASPARAGACEAE)

*Bellevia paradoxa* (Fisch. & C.A.Mey.) Boiss.

Tuen Mun

Bulbous herb cultivated in the home of collector. Tunic leaves ivory to brown. Basal leaves subulate, tips pointed, green. Perianth lobes 6, indigo blue, apex acute. Buds deep ultramarine. Infertile flowers in the raceme tips indigo blue to purplish pink. Scape light green, bluish near flowers. Bracteoles purplish. Pistil light green, subovoid. Product name "Muscari 'Paradoxum'" is shown on package. Imported from the Netherlands, bought from Mong Kok Flower Market.

Coll. K.H. Wong 126 CUSLSH2893 24 Jan 2021

Det. K.H. Wong

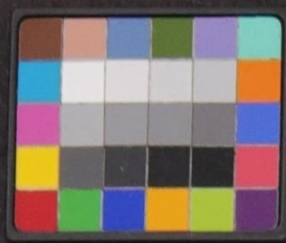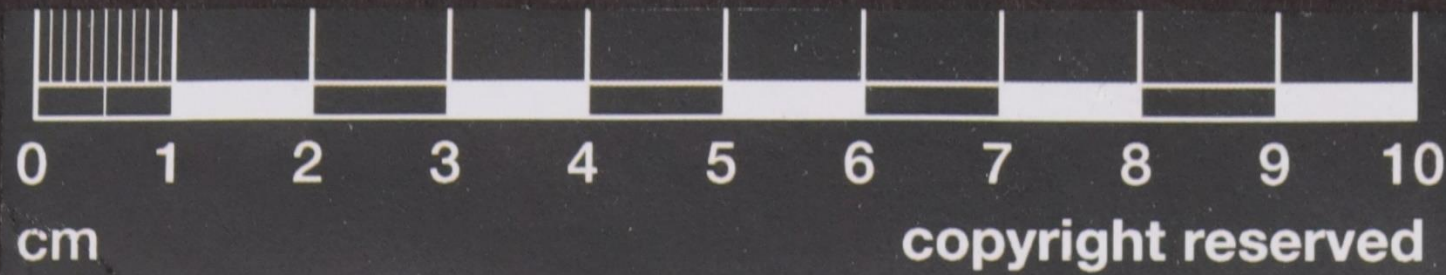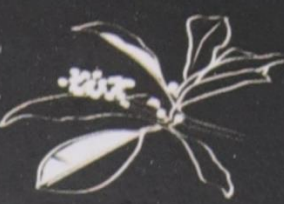

胡秀英植物標本館  
SHIU-YING HU HERBARIUM

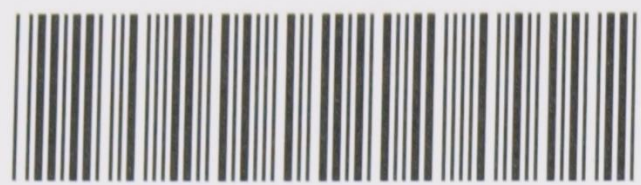

CUHK05324

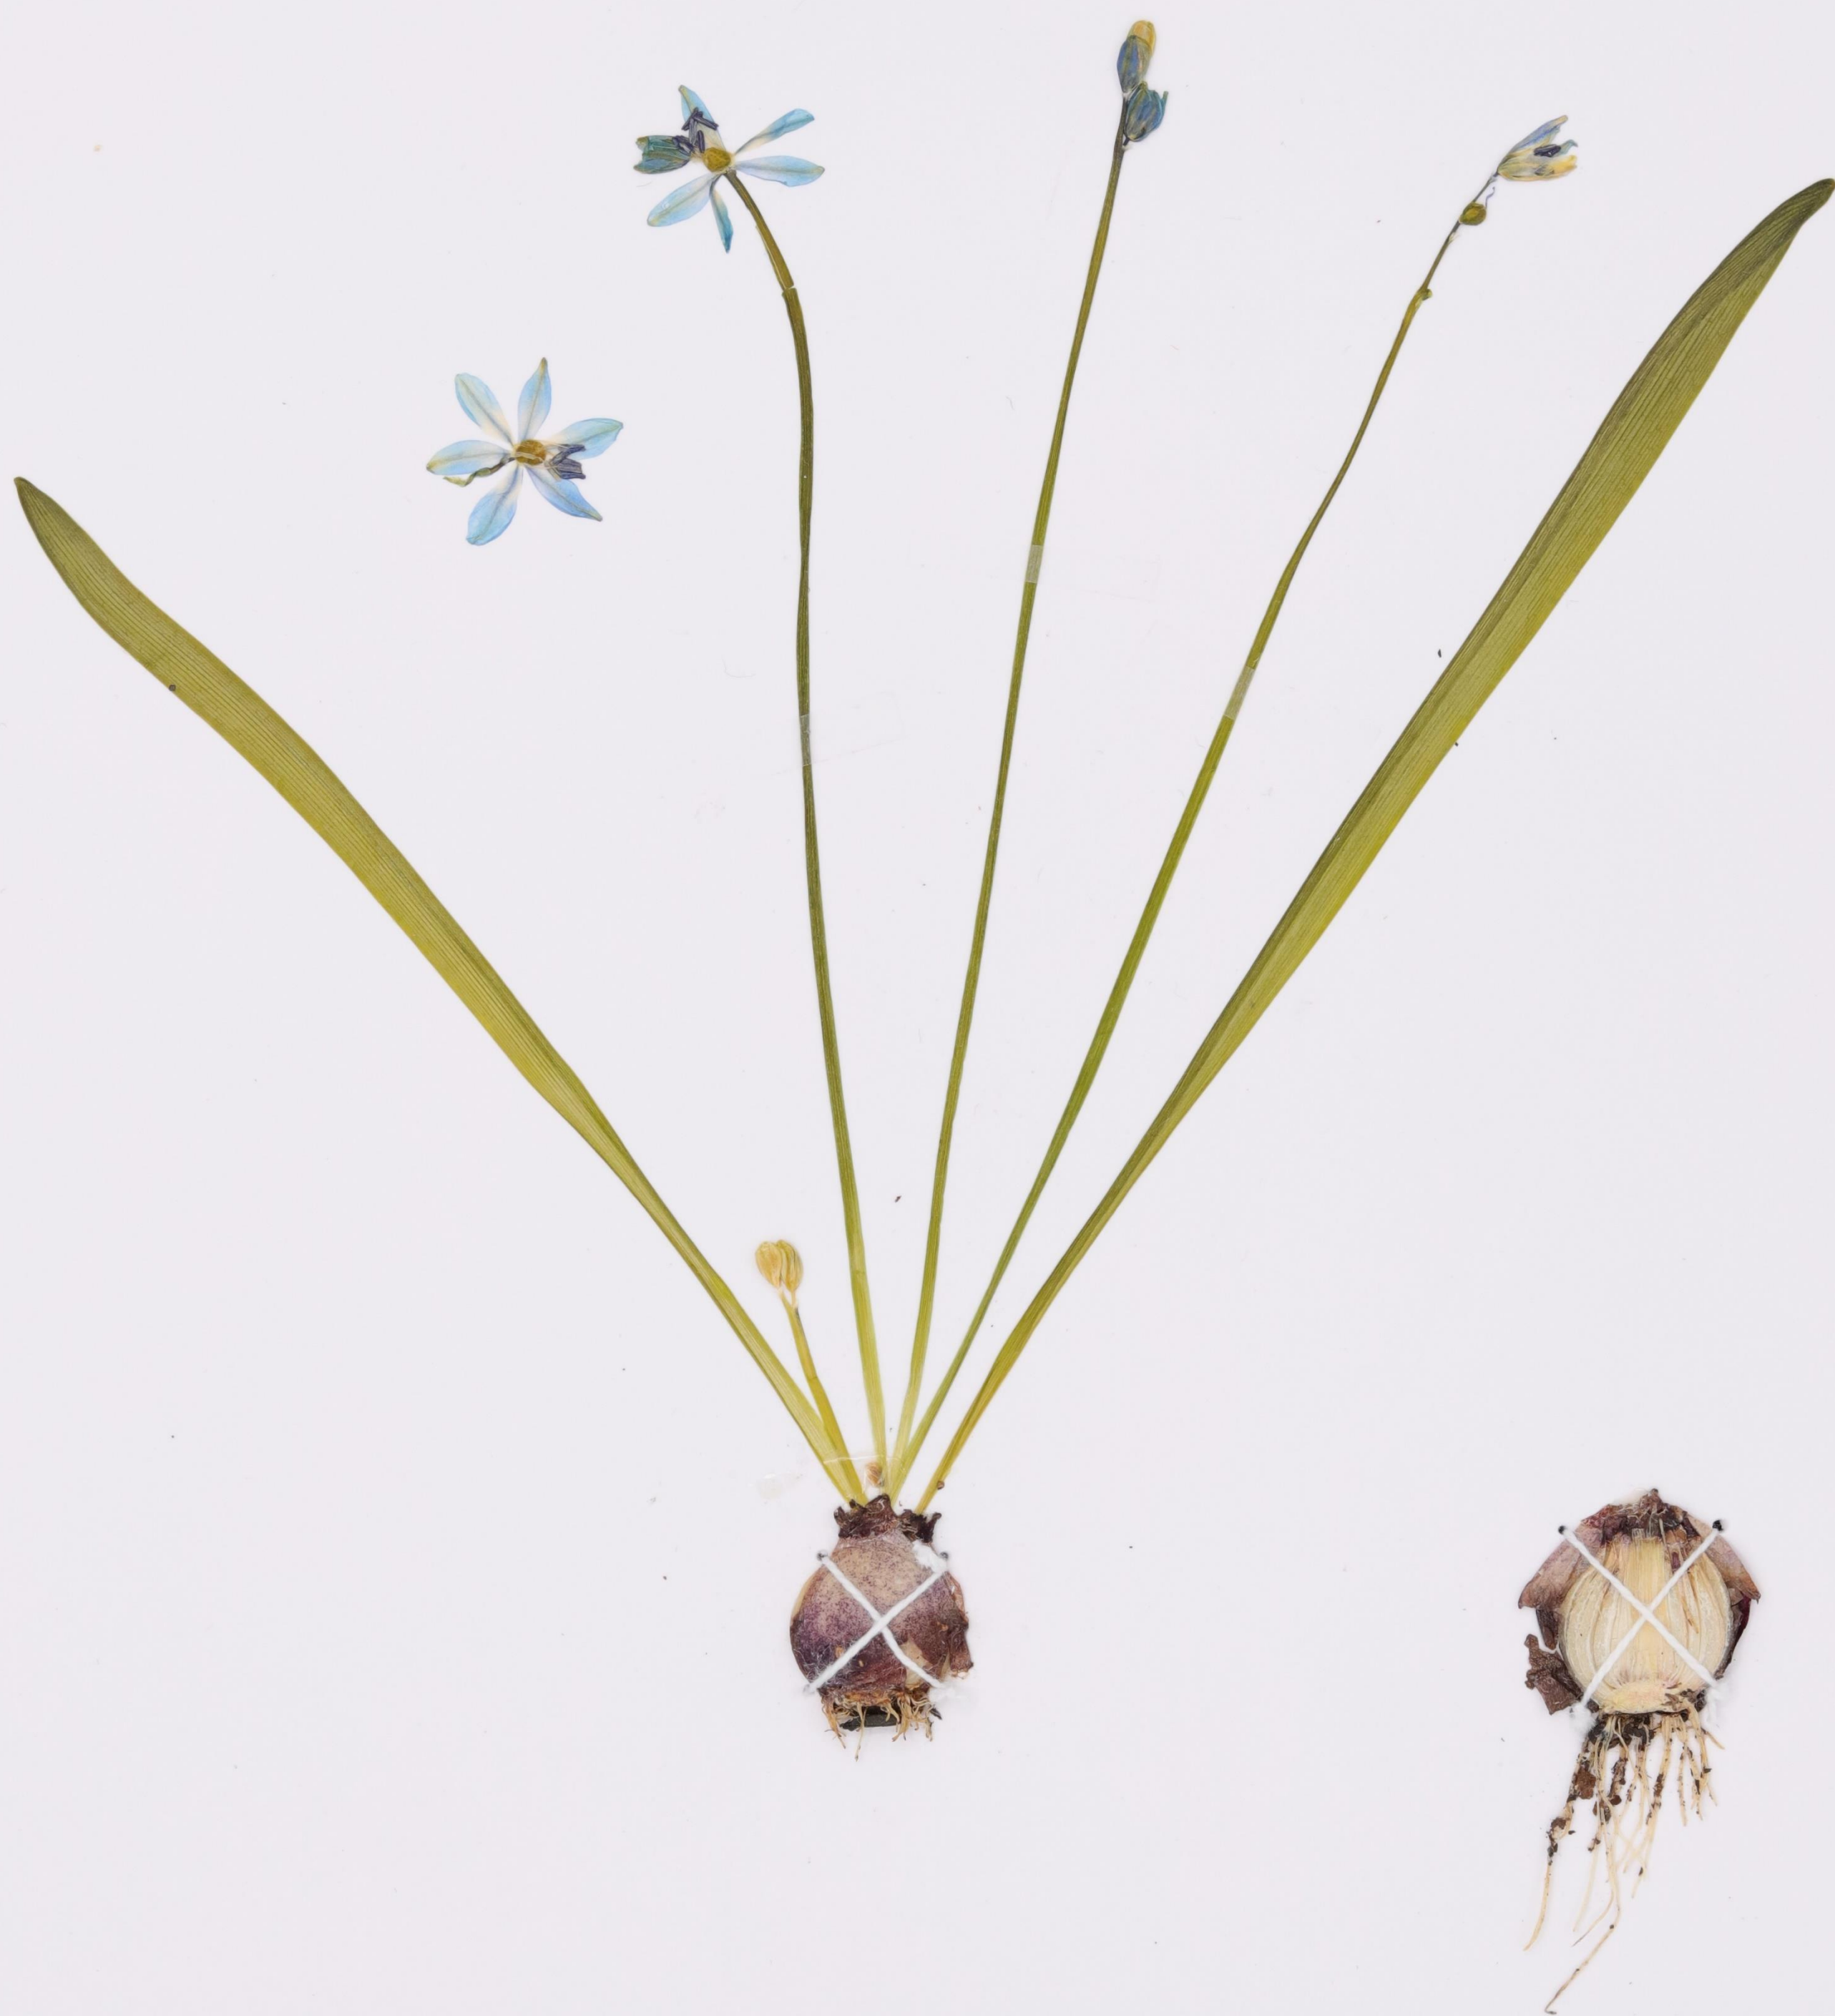

Shiu-Ying Hu Herbarium, CUHK

Plants of Hong Kong

LILIACEAE (ASPARAGACEAE)

*Scilla siberica* Haw. 西伯利亞綿棗兒

Tuen Mun

Bulbous herb cultivated in the home of collector. Tunic leaves blackish purple. Basal leaves green. Flowers sky blue. Scape light green, purplish blue near flowers. Petals 6. Anthers dark purple. Ovary triangularly ovoid. Some flowers with whitish center and whitish anthers. Product name "Scilla 'Siberica'" is shown on package. Imported from the Netherlands, bought from Mong Kok Flower Market.

Coll. K.H. Wong 141 CUSLSH2917 11 Feb 2021

Det. K.H. Wong
