# Supplementary material
Source: MDPI journal article supplement (https://www.mdpi.com/2311-7524/8/5/453)
Supplement: s1 [file s1 › Figure_S4.pdf]

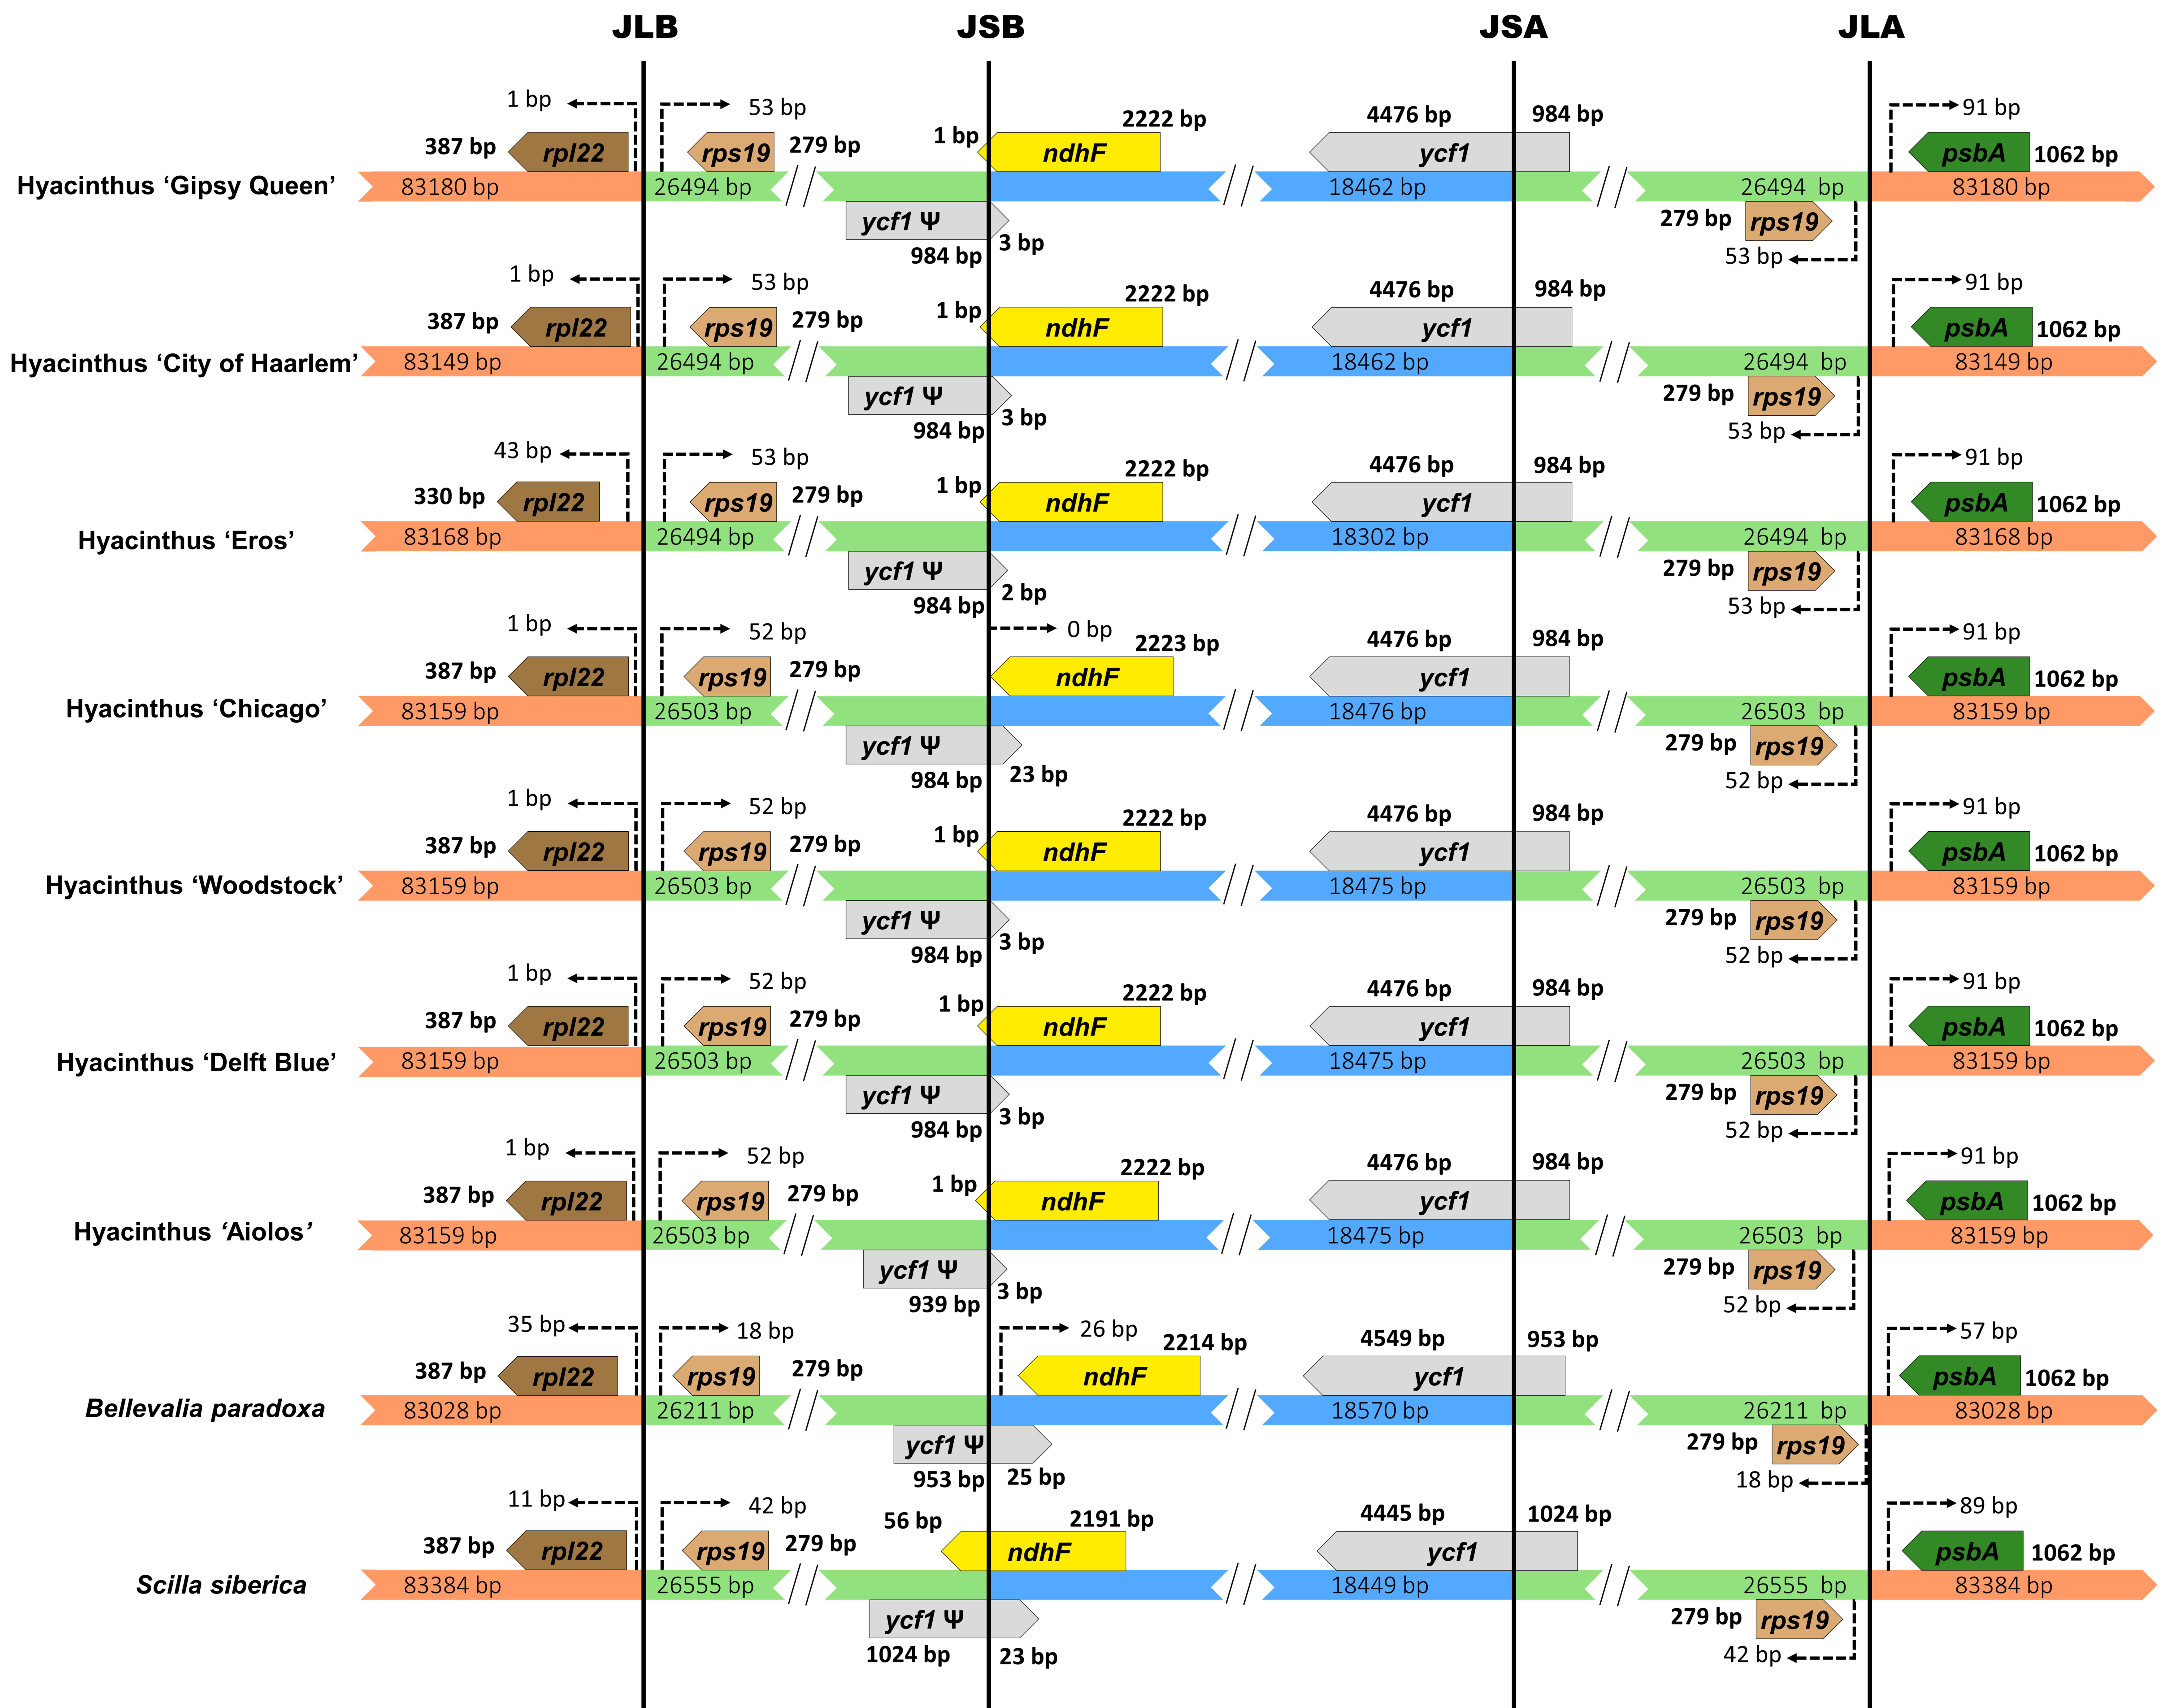

**Figure S4 – Visualisation of the boundary variations across the nine newly assembled chloroplast genomes**

Caption: The diagram was not draw in scale. Size of the gene within the specified regions were indicated by the numbers in bold. Distances from the specified junctions were indicated by the numbers next to the slashed arrows. Lengths of the respective regions were depicted by the numbers within the coloured bands. The directionalities of each gene were reflected by the direction of obtuse angles of the pentagons. Genes specified with Ψ were pseudogenes.
